# Supplementary material for: Systematic reference sample generation for multiplexed serological assays
Source: Springer Nature journal article supplement (doi:10.1038/srep03259), 2013-11-19
Supplement: 41598_2013_BFsrep03259_MOESM1_ESM.pdf [file 41598_2013_BFsrep03259_MOESM1_ESM.pdf]

# **Systematic reference sample generation for multiplexed serological assays**

Hannes Planatscher<sup>1</sup>, Stefanie Rimmele<sup>1</sup>, Gerd Michel<sup>2,3</sup>, Oliver Pötz<sup>1</sup>, Thomas Joos<sup>1</sup>, Nicole Schneiderhan-Marra<sup>1</sup>

- 1- NMI Natural and Medical Sciences Institute at the University of Tuebingen, Markwiesenstr. 55, 72770 Reutlingen, Germany
- 2- FIND, Foundation for Innovative New Diagnostics, Avenue de Budé 16, 1202 Geneva, Switzerland
- 3- present address: Grand Rue 33, 1297 Founex, Switzerland

## Supplement A) Table of screened TB antigens

(all proteins are derived from *E.coli* expression systems)

| Gene Locus | Symbol | description                                                |
|------------|--------|------------------------------------------------------------|
| Rv0212c    | nadR   | asnC-family transcriptional regulator                      |
| Rv0272c    |        | hypothetical protein                                       |
| Rv0302     |        | transcriptional regulator, tetR/acrR-family                |
| Rv0379     | secE2  | protein transport protein                                  |
| Rv0394c    |        | secreted protein                                           |
| Rv0440     | groEL  | 60 kda chaperonin 2 groEL2                                 |
| Rv0456c    | echA2  | enoyl-CoA hydratase                                        |
| Rv0583c    | lpqN   | lipoprotein                                                |
| Rv0632c    | echA3  | enoyl-CoA hydratase                                        |
| Rv0798c    | cfp29  | 29 kda antigen                                             |
| Rv0801     |        | conserved hypothetical protein                             |
| Rv0934     | pstS1  | periplasmic phosphate-binding lipoprotein                  |
| Rv0944     |        | formamidopyrimidine-DNA glycosylase                        |
| Rv0984     | moaB2  | pterin-4-alpha-carbinolamine dehydratase                   |
| Rv1030     | kdpB   | potassium-transporting ATPase B chain                      |
| Rv1175c    | fadH   | NADPH dependent 2,4-dienoyl-CoA reductase                  |
| Rv1196     | PPE18  | PPE family protein                                         |
| Rv1242     |        | conserved hypothetical protein                             |
| Rv1284     |        | conserved hypothetical protein                             |
| Rv1411c    | lprG   | lipoprotein                                                |
| Rv1566c    |        | invasion-associated protein                                |
| Rv1629     | polA   | DNA polymerase I                                           |
| Rv1837c    | glcB   | malate synthase G                                          |
| Rv1860     | apa    | alanine and proline rich secreted protein                  |
| Rv1886c    | fbpB   | secreted fibronectin-binding protein antigen 85-B          |
| Rv1926c    | mpt63  | immunogenic protein                                        |
| Rv1980c    | mpt64  | immunogenic protein                                        |
| Rv1984c    | cfp21  | cutinase precursor                                         |
| Rv2031c    | hspX   | heat shock protein                                         |
| Rv2094c    | tatA   | SEC-independent protein translocase membrane-bound protein |
| Rv2151c    | ftsQ   | cell division protein                                      |
| Rv2252     |        | conserved hypothetical protein                             |
| Rv2282c    |        | transcriptional regulator, lysR-family                     |
| Rv2544     | lppB   | lipoprotein                                                |
| Rv2618     |        | conserved hypothetical protein                             |
| Rv2870c    | dxr    | 1-deoxy-D-xylulose 5-phosphate reductoisomerase            |
| Rv2873     | mpt83  | cell surface lipoprotein                                   |
| Rv2875     | mpt70  | major secreted immunogenic protein                         |
| Rv2927c    |        | conserved hypothetical protein                             |
| Rv2984     | ppk    | polyphosphate kinase                                       |
| Rv3050c    |        | transcriptional regulator, asnC-family                     |
| Rv3243c    |        | hypothetical protein                                       |
| Rv3248c    | sahH   | adenosylhomocysteinase                                     |

|         |      |                                                      |
|---------|------|------------------------------------------------------|
| Rv3319  | sdhB | succinate dehydrogenase iron-sulphur protein subunit |
| Rv3326  |      | transposase                                          |
| Rv3362c |      | ATP/GTP-binding protein                              |
| Rv3376  |      | conserved hypothetical protein                       |
| Rv3495c | lprN | MCE-family lipoprotein mce4E                         |
| Rv3616c |      | conserved alanine and glycine rich protein           |
| Rv3628  | ppa  | inorganic pyrophosphatase                            |
| Rv3762c |      | hydrolase                                            |
| Rv3763  | lpqH | 19 kda lipoprotein antigen precursor                 |
| Rv3775  | lipE | lipase                                               |
| Rv3804c | fbpA | secreted fibronectin-binding protein antigen         |
| Rv3864  |      | conserved hypothetical protein                       |
| Rv3874  | esxB | 10 kda culture filtrate antigen                      |
| Rv3878  |      | conserved alanine rich protein                       |
| Rv3881c |      | conserved alanine and glycine rich protein           |

Supplement B) Input Data

| sample | 42_Rv0212_ADI 2 ls | 43_Rv0212_ADI 2 ss | 44_Rv0272c_ADI 3 | 45_Rv0272_ADI 2 ss |
|--------|--------------------|--------------------|------------------|--------------------|
| 100321 | 1326.5             | 1673               | 530              | 3204               |
| 100348 | 493.5              | 636                | 197.5            | 1068               |
| 100364 | 3899.5             | 4902.5             | 2559.5           | 33077              |
| 100388 | 456                | 652                | 1712             | 25701              |
| 100400 | 555                | 627.5              | 521              | 3784.5             |
| 100455 | 947                | 1368.5             | 625              | 4547               |
| 100460 | 1533               | 2192.5             | 3505             | 33261              |
| 100462 | 587                | 722.5              | 228.5            | 466                |
| 100474 | 1862.5             | 1988               | 1293             | 11277.5            |
| 100480 | 1049               | 1354.5             | 733.5            | 2157               |
| 302314 | 884                | 1566.5             | 716              | 3815.5             |
| 302341 | 673.5              | 895                | 294              | 547.5              |
| 302368 | 513.5              | 713.5              | 256              | 496                |
| 3      | 803                | 2122               | 524              | 1279               |
| 5      | 798                | 1109               | 451.5            | 801                |
| 8      | 377                | 965                | 411.5            | 6319               |
| 9      | 216                | 287.5              | 144              | 270.5              |
| 12     | 481                | 588                | 291              | 514                |
| 13     | 730                | 2152               | 456              | 785.5              |
| 15     | 1175               | 2018               | 666.5            | 690                |
| 17     | 342                | 426                | 253              | 318                |
| 20     | 793.5              | 1100               | 558.5            | 671.5              |
| 21     | 543                | 950.5              | 355              | 937.5              |
| 24     | 712                | 1219.5             | 619              | 2543.5             |
| 25     | 417                | 838                | 145              | 872                |
| 26     | 653                | 627                | 227.5            | 391.5              |
| 28     | 801                | 2217.5             | 387              | 847                |
| 29     | 601.5              | 941                | 375              | 1202               |
| 30     | 1167               | 1629               | 602              | 902                |
| 33     | 768                | 1356               | 688              | 3083.5             |
| 39     | 522                | 901                | 226              | 332                |
| 41     | 350                | 554                | 192              | 267                |
| 42     | 513.5              | 861                | 254              | 442                |
| 44     | 327.5              | 480                | 155              | 214.5              |
| 60     | 364.5              | 545                | 185              | 327                |
| 74     | 540.5              | 520                | 201.5            | 915                |
| 78     | 1169               | 1919               | 773.5            | 927                |
| 84     | 471.5              | 529                | 311.5            | 551                |
| 88     | 140                | 176.5              | 56               | 117                |
| 96     | 225                | 205                | 156              | 259                |
| 98     | 591                | 682                | 395              | 607                |
| 99     | 459                | 1360               | 460              | 438                |
| 100    | 300                | 389                | 184              | 259.5              |
| 102    | 628                | 854                | 424              | 1516               |
| 109    | 799                | 1318               | 478              | 692                |
| 111    | 1001               | 1281               | 775              | 1223               |
| 113    | 2064               | 3058.5             | 926              | 1197               |
| 119    | 542                | 829                | 221              | 437.5              |
| 122    | 513                | 820                | 320              | 401                |

|          |        |        |       |        |
|----------|--------|--------|-------|--------|
| 123      | 328    | 464    | 148.5 | 336    |
| 125      | 381    | 464.5  | 282.5 | 416    |
| 128      | 760    | 1451.5 | 456   | 644    |
| 129      | 2348.5 | 4146.5 | 1545  | 2863   |
| 130      | 661    | 664.5  | 455   | 474    |
| 131      | 617    | 683    | 440   | 379.5  |
| 134      | 653.5  | 591    | 169.5 | 311    |
| 138      | 200    | 278    | 96    | 179    |
| 141      | 208.5  | 314.5  | 125.5 | 210    |
| 142      | 218    | 301    | 157   | 188.5  |
| 143      | 670    | 762    | 498.5 | 572    |
| 149      | 327    | 370    | 159   | 273.5  |
| 150      | 743    | 1073   | 433   | 1658   |
| 154      | 674    | 1385.5 | 549.5 | 726    |
| 155      | 254    | 361    | 201   | 244    |
| 157      | 333.5  | 384.5  | 202   | 317    |
| 158      | 944    | 2267.5 | 540   | 709    |
| 159      | 612    | 557    | 354   | 339    |
| 164      | 581    | 957.5  | 324   | 448    |
| 166      | 753    | 1445   | 475   | 926    |
| 187      | 926    | 1080   | 412   | 1367.5 |
| 188      | 457.5  | 560    | 196.5 | 458    |
| 190      | 594    | 1133   | 330   | 442    |
| 191      | 269    | 388    | 733.5 | 14318  |
| 192      | 494    | 734.5  | 248   | 466    |
| 193      | 507    | 680    | 302.5 | 792    |
| 195      | 625    | 941    | 304   | 492    |
| 198      | 222.5  | 224    | 136   | 619.5  |
| 205      | 2207   | 3716   | 1271  | 1772.5 |
| 208      | 146    | 177.5  | 105   | 275    |
| 210      | 282    | 396.5  | 163   | 250    |
| 212      | 613.5  | 834    | 397   | 546    |
| 215 1260 | 325.5  | 509    | 190   | 309    |
| 215 1746 | 143.5  | 170.5  | 77    | 137.5  |
| 222      | 332.5  | 424    | 169.5 | 262    |
| 227      | 420    | 494    | 121   | 371    |
| 228      | 513    | 575.5  | 397.5 | 496    |
| 240      | 283.5  | 283    | 110   | 177    |
| 247      | 433.5  | 616.5  | 281   | 385.5  |
| 248      | 1164   | 1940   | 770.5 | 852    |
| 251      | 144    | 231    | 98    | 148    |
| 252      | 2383.5 | 3728   | 1565  | 2569   |
| 256      | 374    | 748.5  | 238   | 435    |
| 258      | 2448   | 3275   | 2085  | 12283  |
| 261      | 489.5  | 2538   | 240   | 484    |
| 263      | 676    | 1877.5 | 371   | 559    |
| 265      | 1885.5 | 2891   | 1307  | 1532   |
| 268      | 367    | 825    | 228.5 | 341.5  |
| 271      | 819.5  | 1403   | 455   | 504    |
| 273      | 420    | 592    | 275   | 489    |

|          |        |        |        |        |
|----------|--------|--------|--------|--------|
| 275      | 259    | 439    | 109    | 177.5  |
| 277      | 879    | 1043   | 382    | 601.5  |
| 280      | 326    | 539.5  | 191    | 374    |
| 283      | 1163.5 | 1860   | 941.5  | 1568   |
| 284      | 541    | 613    | 243    | 502    |
| 293      | 1146.5 | 1973.5 | 626    | 957    |
| 298      | 29     | 26     | 17     | 32     |
| 300      | 499.5  | 514.5  | 278    | 404    |
| 301      | 1411   | 2545   | 1133   | 1132   |
| 303      | 275    | 332    | 181    | 243    |
| 305      | 241    | 349.5  | 163    | 209    |
| 307      | 281    | 384.5  | 110    | 746.5  |
| 308      | 584    | 702    | 334.5  | 420    |
| 311      | 219    | 222    | 127    | 230    |
| 314      | 97     | 101    | 62     | 89.5   |
| 325      | 643    | 1820   | 297    | 569.5  |
| 327      | 269    | 623    | 153.5  | 255.5  |
| 328      | 622    | 624.5  | 406.5  | 494    |
| 329      | 656    | 1036   | 341    | 517.5  |
| 332      | 889    | 1473   | 636    | 683    |
| 333      | 579.5  | 668    | 369    | 643.5  |
| 340      | 1597.5 | 2232.5 | 424.5  | 1136   |
| 344      | 531    | 734.5  | 268.5  | 340    |
| 345      | 1048.5 | 2150.5 | 963.5  | 1185   |
| 346      | 1595.5 | 4383.5 | 889    | 1521   |
| 354      | 947    | 1658.5 | 446    | 619    |
| 355      | 832    | 1177   | 501.5  | 671    |
| 358      | 412    | 556    | 222    | 430    |
| 363      | 263    | 343    | 179    | 249    |
| 373      | 418    | 607    | 231    | 390.5  |
| 381      | 315    | 416    | 252    | 292    |
| 382      | 248    | 279.5  | 85     | 155.5  |
| 385      | 451.5  | 528    | 194    | 284    |
| 386      | 280.5  | 320    | 226    | 295    |
| 387      | 671    | 849    | 376    | 498    |
| 392      | 209    | 303    | 123.5  | 219    |
| 395      | 1394.5 | 2260   | 746    | 1147   |
| 397      | 1185   | 1279   | 307.5  | 713    |
| 402      | 82     | 86     | 36     | 86     |
| 410      | 811    | 709.5  | 158    | 458.5  |
| 424      | 243    | 302    | 142    | 278    |
| 446      | 586    | 826    | 295    | 579    |
| 465      | 698.5  | 978    | 471.5  | 600.5  |
| 499      | 566    | 792    | 447    | 497    |
| mean neg | 255.5  | 350    | 112.75 | 231.75 |

| 46_Rv0302_A | 47_Rv0379_A | 48_Rv0394_A | 49_Rv0440_A | 50_Rv0456c_ | 51_Rv0583c_ | 52_Rv0632c_ |
|-------------|-------------|-------------|-------------|-------------|-------------|-------------|
| 161         | 459         | 431         | 367         | 313         | 2601.5      | 434         |
| 322         | 274.5       | 869         | 366         | 1520        | 1224        | 2207.5      |
| 534         | 1754        | 593         | 445         | 3350        | 2685        | 1008        |
| 99          | 272         | 305         | 568         | 192         | 826         | 329         |
| 88          | 391.5       | 8091        | 551.5       | 358.5       | 1971.5      | 1005.5      |
| 209.5       | 388         | 607         | 9622        | 4469        | 3068        | 511         |
| 250         | 740         | 529         | 804.5       | 1616        | 1187        | 1072        |
| 107         | 608         | 255.5       | 218         | 373         | 954.5       | 754         |
| 8451        | 548         | 550         | 418         | 2328        | 1112        | 1341        |
| 296         | 594         | 990.5       | 1928        | 1425        | 3431        | 792.5       |
| 313         | 456         | 715         | 791         | 383         | 948         | 693         |
| 244         | 292         | 303.5       | 492         | 811         | 7107        | 22220       |
| 184.5       | 217         | 220         | 276.5       | 439         | 52162       | 407.5       |
| 177         | 517         | 343         | 390         | 8282        | 880         | 580         |
| 240.5       | 3172        | 476         | 8677        | 216         | 2023        | 654         |
| 723.5       | 3290.5      | 222         | 3206        | 152         | 509         | 397.5       |
| 82.5        | 126         | 111         | 559         | 106         | 967.5       | 252.5       |
| 77          | 2295        | 286.5       | 793         | 180         | 3315        | 29919       |
| 190.5       | 1580        | 414         | 2061        | 4331.5      | 3002.5      | 20410.5     |
| 157         | 1600        | 707.5       | 1233.5      | 863         | 314         | 463.5       |
| 163         | 187         | 217         | 1688        | 205         | 1598.5      | 644         |
| 121         | 549         | 361         | 764         | 897         | 2032        | 544.5       |
| 1382        | 361         | 252.5       | 224.5       | 249         | 785         | 566         |
| 569.5       | 27752       | 408         | 3000        | 471         | 2166        | 796.5       |
| 149.5       | 91.5        | 148         | 138         | 452         | 1709        | 612.5       |
| 81          | 146         | 138         | 326.5       | 149.5       | 5087        | 245         |
| 271         | 299         | 337.5       | 1769.5      | 481.5       | 1273        | 1863        |
| 192         | 364         | 287         | 1382        | 518.5       | 9534.5      | 929         |
| 219         | 10321.5     | 536         | 13919       | 640         | 2373.5      | 872         |
| 258         | 607         | 781         | 8131        | 1351.5      | 516         | 523         |
| 186         | 351         | 313         | 2079.5      | 112         | 529.5       | 386.5       |
| 250         | 126.5       | 204         | 275.5       | 143         | 334         | 579         |
| 154         | 206         | 186         | 174         | 213.5       | 2182        | 1344        |
| 75.5        | 132         | 171         | 179         | 510         | 336.5       | 347         |
| 152         | 145.5       | 197         | 2712        | 173         | 335.5       | 320         |
| 209         | 193         | 188         | 446         | 266         | 631         | 606         |
| 97          | 855         | 631.5       | 674.5       | 338         | 1167        | 652.5       |
| 86          | 222         | 153         | 1290        | 6028.5      | 1038        | 385.5       |
| 44          | 57          | 65          | 81          | 302         | 221         | 67          |
| 225.5       | 8234        | 324         | 197         | 2287.5      | 533.5       | 453         |
| 417         | 478.5       | 545         | 355         | 5874.5      | 2527        | 590         |
| 186         | 278         | 273         | 170         | 263         | 556         | 398         |
| 5303.5      | 128.5       | 165.5       | 715         | 144         | 534         | 320.5       |
| 231         | 306.5       | 298         | 3999        | 278.5       | 680         | 473.5       |
| 213         | 410         | 438         | 381         | 2702.5      | 20906       | 1833        |
| 2787        | 1195        | 527.5       | 3986        | 940         | 3797        | 3158        |
| 230         | 742.5       | 1917        | 526.5       | 1054        | 1045        | 2536        |
| 99          | 507         | 273         | 169         | 1502.5      | 2172        | 223.5       |
| 148         | 15775.5     | 381.5       | 7568        | 210         | 1019.5      | 341         |

|         |         |       |        |        |         |         |
|---------|---------|-------|--------|--------|---------|---------|
| 93      | 517     | 246   | 109.5  | 614    | 1057    | 383     |
| 209     | 26438   | 248   | 465    | 125    | 5632    | 1940.5  |
| 412     | 330.5   | 298   | 265    | 581.5  | 3015.5  | 517     |
| 280     | 1431    | 1816  | 761    | 844    | 962     | 23926   |
| 384     | 28305   | 581   | 233    | 1534   | 1774    | 252     |
| 668     | 23234   | 305   | 344.5  | 228.5  | 1557    | 2482    |
| 133     | 177     | 167   | 2848   | 12941  | 1267    | 222.5   |
| 75      | 90      | 126.5 | 62     | 1572   | 890.5   | 223     |
| 150     | 110     | 259   | 186    | 217.5  | 772     | 252     |
| 87      | 85      | 142   | 173    | 295.5  | 701     | 253     |
| 193.5   | 363     | 307   | 12467  | 509    | 5694    | 8432    |
| 107     | 133.5   | 151.5 | 78     | 871    | 1451    | 192.5   |
| 94      | 537     | 605   | 331.5  | 363.5  | 1163    | 571.5   |
| 226     | 20976   | 558.5 | 6379.5 | 357.5  | 1964.5  | 35197.5 |
| 575.5   | 76      | 85.5  | 684    | 98     | 559     | 256     |
| 155     | 3162    | 334   | 1431   | 201.5  | 1775.5  | 323.5   |
| 180.5   | 779     | 529   | 1069   | 1715   | 5570    | 712.5   |
| 114     | 260     | 228.5 | 191    | 15628  | 1006    | 342     |
| 121.5   | 276     | 274   | 255.5  | 236    | 478     | 9676    |
| 703     | 8607    | 460   | 645    | 304    | 3594.5  | 558     |
| 352     | 306     | 392   | 581    | 382    | 2139    | 552     |
| 81      | 166     | 379   | 452    | 1578   | 1167    | 386     |
| 120     | 438     | 414   | 346    | 220.5  | 1123    | 403     |
| 100.5   | 133.5   | 150.5 | 139.5  | 126.5  | 699.5   | 182     |
| 153     | 172     | 312   | 312    | 1124   | 488     | 404     |
| 148     | 337.5   | 356   | 294    | 1042   | 848     | 391.5   |
| 198     | 442     | 279   | 210    | 489    | 547     | 698     |
| 418     | 235     | 154   | 108    | 93     | 666     | 566.5   |
| 23637.5 | 2206    | 1225  | 8272   | 743    | 18566.5 | 1392    |
| 181.5   | 109     | 101   | 90     | 82     | 426.5   | 256     |
| 104     | 154     | 247   | 812    | 227.5  | 2075.5  | 242.5   |
| 112     | 1323    | 315.5 | 257.5  | 212    | 517     | 304     |
| 102     | 346     | 677.5 | 1034   | 450.5  | 280.5   | 284     |
| 41      | 55      | 70    | 450    | 42     | 122     | 85.5    |
| 131     | 133     | 154   | 2200   | 799    | 697     | 242     |
| 429     | 156     | 898   | 289.5  | 256.5  | 937.5   | 599     |
| 127     | 604     | 377.5 | 221    | 337    | 595     | 388     |
| 97.5    | 104     | 105.5 | 756    | 87     | 10626.5 | 215     |
| 526     | 643.5   | 466   | 714    | 3315.5 | 3285    | 1215    |
| 167     | 904.5   | 673   | 277.5  | 220.5  | 3303    | 424.5   |
| 1277    | 320     | 90    | 6708   | 81     | 452     | 3371.5  |
| 528     | 1758    | 1974  | 3188   | 2983   | 893     | 30219   |
| 840     | 331.5   | 170   | 203    | 753.5  | 654     | 570     |
| 117     | 759.5   | 1234  | 1077   | 550.5  | 363.5   | 1044    |
| 635     | 376.5   | 173   | 1657   | 206.5  | 612.5   | 1347    |
| 190.5   | 283     | 475   | 431    | 622    | 760     | 540     |
| 913     | 1354    | 1516  | 952    | 955    | 21575   | 1247    |
| 89      | 180     | 178   | 448.5  | 244    | 260     | 15065   |
| 167.5   | 12954.5 | 687.5 | 309    | 228    | 318     | 2909    |
| 1110    | 301     | 225   | 359    | 391.5  | 692     | 349     |



|       |        |        |        |        |        |        |
|-------|--------|--------|--------|--------|--------|--------|
| 163.5 | 108.5  | 177.5  | 67.5   | 453.5  | 968.5  | 315    |
| 214   | 291    | 367    | 1118   | 1653   | 2968   | 673    |
| 341   | 156    | 176.5  | 6765   | 155    | 1041   | 775    |
| 336   | 1935   | 1094.5 | 788.5  | 1195   | 2210   | 1316   |
| 1168  | 305    | 300    | 467    | 838    | 762    | 2351   |
| 172   | 589.5  | 624    | 1366   | 467    | 4178   | 3965   |
| 10    | 9      | 13     | 6      | 16     | 8      | 17     |
| 119   | 289    | 228    | 3945   | 300.5  | 1555.5 | 698    |
| 7305  | 2967   | 1678   | 2452   | 480    | 1188   | 755    |
| 61.5  | 152    | 96     | 133    | 6581   | 983    | 189.5  |
| 161   | 96     | 343    | 848.5  | 155    | 380    | 209    |
| 783.5 | 98     | 148    | 767.5  | 4377   | 394    | 636    |
| 143   | 20999  | 322.5  | 1745   | 235    | 760.5  | 427    |
| 112   | 132    | 116    | 110    | 94     | 4069.5 | 250.5  |
| 64    | 49     | 65     | 267    | 118    | 4018   | 166    |
| 154.5 | 3031   | 295.5  | 733.5  | 290.5  | 1279   | 719.5  |
| 644   | 147    | 156.5  | 83     | 654.5  | 676    | 200.5  |
| 95    | 597.5  | 466.5  | 4063   | 648.5  | 1891.5 | 584    |
| 173   | 243    | 324    | 360.5  | 7839   | 385.5  | 430    |
| 167   | 665.5  | 572    | 1447   | 370    | 455.5  | 626    |
| 246   | 344    | 278    | 4145   | 2134   | 517    | 376    |
| 1044  | 476    | 412    | 3173   | 620    | 1093.5 | 596    |
| 133   | 196    | 253    | 907    | 574    | 998    | 874.5  |
| 857   | 1089   | 794.5  | 874    | 1319   | 3551   | 1733.5 |
| 121   | 1066.5 | 502.5  | 1525   | 1589.5 | 553    | 978    |
| 269   | 332.5  | 440    | 1366   | 1258   | 354    | 43311  |
| 270   | 1355.5 | 791    | 421    | 227.5  | 2776   | 441    |
| 309   | 192    | 198    | 526    | 311    | 7444.5 | 4086.5 |
| 108   | 202    | 137    | 1408   | 101    | 2369.5 | 200.5  |
| 142   | 251    | 236.5  | 508    | 1165   | 620    | 338    |
| 118.5 | 292    | 186.5  | 7461   | 150.5  | 1236   | 316.5  |
| 536.5 | 215    | 102    | 582    | 532    | 1029.5 | 231    |
| 230   | 647    | 183    | 191    | 2313.5 | 748    | 472    |
| 661   | 939.5  | 155    | 660    | 1240.5 | 1259   | 378    |
| 100.5 | 222    | 376    | 1508.5 | 353    | 246    | 299    |
| 179   | 130    | 160.5  | 574    | 85.5   | 870    | 377    |
| 555   | 4802   | 762    | 512    | 568    | 956    | 14486  |
| 122   | 302    | 267    | 676    | 205.5  | 19800  | 357    |
| 67    | 34     | 35     | 68     | 82.5   | 1741   | 546    |
| 79    | 217    | 323    | 768    | 434    | 31048  | 236    |
| 157   | 9221   | 217    | 1033   | 503    | 3650   | 1184   |
| 98.5  | 616.5  | 313    | 157    | 302    | 2922   | 1418   |
| 255   | 492.5  | 2163   | 13481  | 326    | 1687   | 798    |
| 2742  | 329    | 346    | 785    | 3803.5 | 2481.5 | 664.5  |
| 57    | 103.5  | 136.75 | 71     | 130    | 307    | 358.25 |

| 53_Rv0798c_ | 54_Rv0801_A | 55_Rv0934_A | 56_Rv0944_A | 57_Rv0984_A | 58_Rv1030_A | 59_Rv1175c_ |
|-------------|-------------|-------------|-------------|-------------|-------------|-------------|
| 2188        | 2435        | 4661        | 1721        | 887         | 764.5       | 4600        |
| 511         | 414         | 1715.5      | 3389.5      | 2641        | 343         | 2091.5      |
| 809         | 703.5       | 986         | 1775        | 1782        | 1044        | 3922        |
| 424         | 420         | 279         | 934         | 484         | 266         | 1655        |
| 530         | 621         | 880         | 921         | 1447        | 344         | 1223.5      |
| 1289.5      | 837.5       | 489         | 2270        | 1466        | 3770        | 10029       |
| 1605        | 10974       | 572         | 8649        | 2443        | 1129.5      | 3845        |
| 509.5       | 401         | 1409.5      | 973.5       | 4615        | 882         | 2043        |
| 1697        | 1038.5      | 535         | 6953        | 1915        | 669         | 3197        |
| 1241        | 2365        | 904.5       | 3095.5      | 1523        | 2037        | 6247        |
| 2376.5      | 635.5       | 30680       | 1638        | 1422.5      | 2248        | 4776        |
| 553         | 489.5       | 215         | 1343        | 480.5       | 983         | 2101        |
| 501.5       | 1454        | 234         | 3501        | 693         | 690.5       | 6269        |
| 1367        | 615         | 41075       | 1565        | 785         | 955.5       | 2051        |
| 758         | 674         | 482         | 1214.5      | 799         | 1456.5      | 3773.5      |
| 563.5       | 300         | 19534.5     | 1132        | 514         | 500.5       | 1241        |
| 451         | 218         | 103         | 605         | 220         | 168         | 896.5       |
| 352         | 484         | 134         | 1125        | 311         | 371         | 2100        |
| 1338        | 591         | 31659.5     | 1306        | 868         | 774.5       | 1985.5      |
| 748.5       | 702.5       | 8883        | 1422        | 594.5       | 1144        | 4066        |
| 1469        | 1491.5      | 187         | 37871       | 496         | 225         | 5840        |
| 1205.5      | 684.5       | 5390        | 2416.5      | 899         | 496         | 3212        |
| 466         | 645.5       | 16397       | 2096        | 959         | 517         | 1649        |
| 607         | 499         | 13770       | 3266        | 1078        | 1023.5      | 2446        |
| 2421        | 576.5       | 211         | 970         | 222.5       | 262         | 803         |
| 1456        | 1045        | 191         | 22589       | 418         | 198         | 1043.5      |
| 5437.5      | 1070        | 36891.5     | 9260.5      | 986         | 522         | 1834        |
| 947.5       | 971         | 290.5       | 3335        | 579         | 824         | 3404        |
| 770         | 697.5       | 18947       | 3833        | 1358        | 1339.5      | 3356        |
| 3932.5      | 2859        | 349         | 2361        | 769         | 502         | 2194        |
| 521         | 303         | 224.5       | 1113        | 328         | 289         | 1181        |
| 1325        | 290         | 128         | 894         | 305.5       | 184         | 717         |
| 479         | 556         | 319.5       | 10060       | 427         | 313         | 1597        |
| 319.5       | 211.5       | 84          | 386         | 146         | 143         | 702         |
| 456         | 239         | 116         | 721         | 241         | 331         | 1305        |
| 2222        | 398         | 126.5       | 2136        | 527         | 407         | 1369        |
| 2459        | 743         | 32051       | 2343.5      | 887         | 1023.5      | 3952        |
| 467         | 452         | 119         | 1054        | 377         | 172         | 753         |
| 365         | 156.5       | 48          | 291         | 112.5       | 77.5        | 277         |
| 329         | 205         | 207.5       | 1237        | 424         | 265         | 680         |
| 835.5       | 899.5       | 606         | 1399        | 1062        | 794         | 1885.5      |
| 501         | 450         | 22785       | 4633        | 603         | 1285        | 4488.5      |
| 280         | 263         | 106.5       | 625         | 275.5       | 116         | 610         |
| 1048        | 583         | 321         | 818         | 844         | 369         | 753         |
| 1492        | 1337.5      | 372         | 2362.5      | 1113.5      | 1055.5      | 4463.5      |
| 1878        | 914         | 4021        | 3469.5      | 2124        | 1120        | 4172.5      |
| 1747.5      | 929         | 865         | 3119        | 1332        | 1289.5      | 5880.5      |
| 448         | 332.5       | 130.5       | 673.5       | 233         | 243         | 1233        |
| 596         | 987         | 9748.5      | 2118.5      | 678.5       | 1313        | 21275       |

|        |        |         |        |        |        |        |
|--------|--------|---------|--------|--------|--------|--------|
| 252.5  | 241.5  | 233     | 723    | 418    | 156    | 699    |
| 854    | 428.5  | 3624    | 899.5  | 351    | 763    | 2391.5 |
| 1264   | 838    | 22566   | 1527   | 789.5  | 635    | 1368   |
| 2158   | 1140.5 | 768     | 3120.5 | 1375   | 1807   | 5870   |
| 485    | 458    | 523     | 967    | 975    | 2473.5 | 16928  |
| 374    | 436    | 1243.5  | 1665   | 446    | 465    | 1407   |
| 287    | 252    | 111.5   | 1601   | 360    | 390    | 1330   |
| 255    | 191    | 80      | 598    | 181.5  | 183    | 585    |
| 1506   | 267    | 234     | 947    | 296    | 386    | 816    |
| 202.5  | 194    | 93      | 768.5  | 171    | 103.5  | 418.5  |
| 1087.5 | 927    | 1822.5  | 1383   | 648.5  | 462.5  | 1860.5 |
| 438    | 248    | 100     | 902.5  | 267    | 240    | 1217.5 |
| 2037   | 540    | 12158   | 1923   | 1488.5 | 2669   | 5912   |
| 2744   | 602    | 24110   | 2417   | 2189   | 1258.5 | 3769   |
| 405    | 252    | 96      | 250    | 222    | 226.5  | 491    |
| 859    | 800.5  | 2922    | 35658  | 1360   | 358.5  | 1421   |
| 883    | 696    | 26899   | 3136.5 | 756    | 503    | 2375   |
| 1290   | 328    | 192     | 693.5  | 465    | 257    | 997    |
| 1214   | 19281  | 3221    | 1868   | 519    | 441    | 1981   |
| 690    | 592    | 14577.5 | 1163   | 1216.5 | 838    | 2432   |
| 1010   | 798    | 393     | 1714   | 741    | 356    | 2061   |
| 353    | 337.5  | 185     | 664    | 305.5  | 210.5  | 1666   |
| 3912   | 482    | 34160   | 1530   | 944    | 1793   | 1915.5 |
| 311    | 298    | 108     | 3070   | 295    | 169.5  | 758    |
| 5399.5 | 510    | 387     | 1806   | 1052   | 215    | 747    |
| 4979   | 427    | 517     | 1413.5 | 999    | 601    | 1824   |
| 556    | 425    | 175     | 1242   | 460.5  | 337    | 1018   |
| 206    | 159.5  | 196.5   | 562    | 416    | 289    | 456    |
| 3169.5 | 1833   | 28789   | 4342.5 | 1897   | 1258   | 4668   |
| 252.5  | 156    | 72      | 294    | 140    | 205    | 962    |
| 856.5  | 275    | 148     | 1035   | 419    | 365    | 758.5  |
| 484.5  | 678    | 1130    | 783    | 533    | 705    | 1638   |
| 312.5  | 273    | 1137    | 1235   | 322    | 257    | 702    |
| 208.5  | 2570   | 54      | 380    | 135    | 115    | 492.5  |
| 484    | 394    | 110.5   | 570    | 283    | 172    | 648    |
| 235    | 372    | 740     | 755    | 402    | 373    | 963    |
| 1177   | 363    | 250     | 724.5  | 508    | 462    | 4813   |
| 841    | 484    | 69      | 695    | 170    | 141    | 1223   |
| 1211.5 | 525    | 4749.5  | 1363   | 705    | 470    | 1646   |
| 984.5  | 625    | 192     | 1426   | 444    | 441    | 2538   |
| 1486   | 478    | 8428    | 30034  | 310.5  | 107    | 404.5  |
| 2433   | 2271   | 1478    | 12805  | 5424   | 2738.5 | 6445   |
| 5677   | 506    | 17089   | 1900   | 654    | 362    | 1429   |
| 2517.5 | 1145.5 | 1176    | 2043   | 2812   | 7748   | 21344  |
| 2167.5 | 420    | 15899   | 1050   | 454.5  | 280    | 869.5  |
| 554    | 447.5  | 34724.5 | 1181   | 828    | 689    | 4392   |
| 1292   | 2163   | 16365   | 3811.5 | 1616   | 2063.5 | 7582   |
| 4483   | 409.5  | 22600.5 | 1084   | 432    | 269.5  | 841    |
| 1973   | 1145.5 | 936     | 1580   | 1314   | 4499   | 8067   |
| 4896.5 | 492    | 246     | 1426.5 | 541    | 647    | 1753   |

|        |        |         |         |        |       |        |
|--------|--------|---------|---------|--------|-------|--------|
| 179.5  | 161    | 100.5   | 741.5   | 200    | 192   | 636    |
| 1528   | 836.5  | 366     | 2816.5  | 768.5  | 341.5 | 1963   |
| 1282   | 329    | 134     | 773     | 344    | 222.5 | 1060   |
| 1339   | 1198   | 8568.5  | 6132    | 4086   | 3556  | 10864  |
| 1295.5 | 508    | 291     | 1492    | 736    | 1207  | 4706   |
| 1346   | 850    | 441.5   | 4505    | 937    | 1099  | 5155   |
| 34     | 28     | 12.5    | 53      | 21     | 11    | 61     |
| 2395   | 397    | 1570    | 1115    | 578    | 544   | 1049   |
| 993    | 1126   | 21483   | 4876.5  | 1124   | 763   | 3742   |
| 301    | 216    | 105     | 528     | 209    | 175   | 654    |
| 274.5  | 243    | 148     | 821.5   | 331    | 134   | 404.5  |
| 1376   | 393.5  | 123     | 27476   | 294    | 165   | 824    |
| 1013   | 445    | 2382.5  | 2481    | 943.5  | 1362  | 5446   |
| 2329.5 | 4539   | 102     | 1530    | 307    | 230   | 939    |
| 112    | 196.5  | 45      | 421     | 109    | 138   | 1268   |
| 974    | 503    | 30506.5 | 1095    | 1026.5 | 559.5 | 1095   |
| 4347   | 335    | 7267    | 1058    | 265    | 203   | 807    |
| 1772   | 553    | 930     | 812     | 955    | 1885  | 2425   |
| 1521   | 632    | 204     | 1276    | 672.5  | 198   | 1445   |
| 1004   | 690    | 356.5   | 2342.5  | 1239.5 | 765   | 3514   |
| 1376.5 | 635    | 684.5   | 1145    | 522    | 1116  | 1972   |
| 1030.5 | 951.5  | 15407   | 1424    | 838    | 502   | 1475   |
| 967.5  | 443    | 4398.5  | 1380    | 459.5  | 420   | 1754   |
| 2755.5 | 1329   | 37687   | 11760.5 | 6039.5 | 1359  | 4140   |
| 4873.5 | 1164.5 | 47817.5 | 2651    | 1406.5 | 1554  | 4292   |
| 2812   | 590    | 1147.5  | 1467    | 1281   | 335   | 905    |
| 676.5  | 569    | 966.5   | 1856    | 913    | 444.5 | 1570   |
| 859    | 497    | 159     | 1154    | 410    | 656   | 1319.5 |
| 282    | 301    | 118     | 8689    | 273    | 294   | 745    |
| 490.5  | 418.5  | 200     | 919     | 467.5  | 414.5 | 1631   |
| 291    | 281    | 2931.5  | 1130    | 349    | 456   | 1326   |
| 218    | 267    | 105.5   | 359     | 143    | 220   | 946    |
| 1438   | 315    | 116     | 752     | 287    | 237   | 2739   |
| 3357   | 309.5  | 512     | 1178.5  | 573.5  | 278   | 1045   |
| 628    | 482    | 1208    | 918     | 910    | 2867  | 13030  |
| 679    | 222    | 96      | 560     | 257    | 380   | 1357   |
| 1881   | 1276.5 | 29527   | 6984.5  | 1265   | 735   | 2364   |
| 1478.5 | 1224   | 233     | 1420    | 592    | 505   | 2559.5 |
| 97     | 136    | 34      | 277     | 74     | 82.5  | 937.5  |
| 1261   | 1567   | 243     | 2087.5  | 844.5  | 2062  | 8687   |
| 703    | 323    | 1272    | 1074    | 2122   | 239.5 | 969    |
| 580    | 571    | 1807    | 1167    | 3810.5 | 322.5 | 1201   |
| 1639.5 | 771    | 982.5   | 2237    | 1451   | 676.5 | 3916   |
| 613    | 536    | 3704    | 1201    | 775    | 633   | 1498   |
| 255    | 221.5  | 114.5   | 572.5   | 269.5  | 164   | 846    |

| 60_Rv1196_A | 61_Rv1242_A | 62_Rv1242_A | 63_Rv1284_A | 64_Rv1411c_ | 65_Rv1566c_ | 66_Rv1629_A |
|-------------|-------------|-------------|-------------|-------------|-------------|-------------|
| 1922        | 1149        | 1159        | 1660        | 442         | 5673        | 628         |
| 266         | 287         | 352.5       | 2649        | 306         | 1013        | 328.5       |
| 557         | 610         | 691.5       | 2196        | 113         | 1758        | 1048        |
| 266         | 287         | 340         | 426         | 39          | 393         | 5225        |
| 348         | 323.5       | 603         | 615         | 302.5       | 630         | 574         |
| 775         | 872         | 1101        | 639         | 55          | 507         | 869         |
| 837.5       | 772         | 1270        | 1280        | 75          | 3096        | 780         |
| 308.5       | 288         | 438         | 799.5       | 36          | 213         | 1498.5      |
| 698.5       | 848         | 926.5       | 12527.5     | 1524        | 1495        | 962.5       |
| 913         | 882         | 1106.5      | 979         | 105.5       | 1797.5      | 1701.5      |
| 7856.5      | 898         | 1277        | 1874.5      | 61          | 10925       | 1023        |
| 507         | 630         | 742         | 23073       | 74          | 801         | 1042        |
| 647.5       | 544.5       | 509.5       | 681.5       | 40          | 422         | 752.5       |
| 818.5       | 811.5       | 990         | 1065.5      | 15002.5     | 907         | 373.5       |
| 1783        | 667         | 759         | 674         | 131         | 462         | 617         |
| 460         | 353         | 341         | 316.5       | 47.5        | 324         | 315.5       |
| 164         | 204         | 213.5       | 616         | 29          | 226         | 170.5       |
| 310.5       | 605         | 649         | 336         | 31          | 260.5       | 555         |
| 577         | 685         | 877         | 989         | 10980       | 905         | 376         |
| 677         | 766         | 854         | 16738.5     | 55          | 1019.5      | 572         |
| 211.5       | 280         | 338         | 411         | 34          | 364         | 2307        |
| 492         | 689         | 805         | 1389.5      | 51          | 8694        | 1267        |
| 387.5       | 316         | 505         | 5073.5      | 2296.5      | 379.5       | 399.5       |
| 18198       | 1243        | 1077.5      | 617         | 2822        | 507.5       | 297         |
| 416.5       | 346         | 506         | 1124        | 39          | 167         | 240         |
| 319.5       | 461         | 369         | 1093        | 221         | 204         | 171         |
| 447         | 529         | 622         | 679.5       | 503         | 288         | 350         |
| 611         | 607         | 658         | 442         | 69          | 426         | 866         |
| 15858.5     | 1050        | 1023        | 4216        | 370         | 824.5       | 8555        |
| 659.5       | 636         | 717         | 891         | 62          | 662         | 1149.5      |
| 230         | 324         | 375         | 825.5       | 44          | 268         | 210.5       |
| 221         | 257         | 321         | 276         | 33          | 279.5       | 269         |
| 225         | 308         | 434         | 554.5       | 90          | 362         | 237         |
| 207         | 199         | 241         | 335         | 40          | 193         | 242         |
| 264         | 259         | 275         | 2602.5      | 31          | 236         | 322         |
| 198.5       | 268         | 298         | 788.5       | 40.5        | 259.5       | 1967        |
| 839.5       | 907.5       | 930         | 5338        | 92          | 638.5       | 14725       |
| 211         | 298         | 406.5       | 458.5       | 54          | 432.5       | 253         |
| 98          | 106         | 124         | 196         | 43          | 146         | 119         |
| 360.5       | 203         | 248         | 423         | 574         | 894         | 137         |
| 21148.5     | 718         | 1169        | 4721        | 51          | 511         | 343.5       |
| 346         | 456         | 490         | 697         | 104         | 287         | 304         |
| 155         | 206         | 249         | 423         | 38          | 988         | 134         |
| 777         | 437         | 594         | 675         | 50          | 435         | 350         |
| 1690.5      | 806         | 935.5       | 1051        | 60          | 640         | 529         |
| 1159        | 1062        | 940.5       | 3000        | 4879        | 1312        | 1356        |
| 3639.5      | 1249.5      | 1391        | 1407.5      | 78          | 2377.5      | 2660        |
| 309         | 245.5       | 362         | 659         | 49          | 334         | 417         |
| 449         | 516.5       | 597         | 8820        | 56.5        | 255         | 394         |

|        |        |        |         |        |        |        |
|--------|--------|--------|---------|--------|--------|--------|
| 155    | 212    | 240.5  | 891     | 107    | 1996   | 210    |
| 282    | 350    | 355    | 7782    | 175    | 19869  | 196    |
| 468.5  | 640    | 643.5  | 4824    | 377    | 593    | 390.5  |
| 11648  | 2073   | 1956   | 6608.5  | 7465   | 2850.5 | 634    |
| 486    | 525    | 652    | 6601    | 46     | 591    | 1913   |
| 286.5  | 399.5  | 424    | 560     | 45     | 534    | 623    |
| 225.5  | 343    | 314    | 346     | 109.5  | 199    | 234    |
| 132    | 156    | 177    | 436.5   | 30     | 126    | 166.5  |
| 171    | 204    | 204.5  | 370     | 37     | 1772   | 143    |
| 192    | 158    | 182.5  | 349.5   | 29     | 149    | 182    |
| 769    | 606.5  | 638    | 588     | 64     | 630    | 481    |
| 361    | 210    | 233.5  | 401     | 35     | 1119   | 149    |
| 10912  | 1014.5 | 1185   | 765     | 40     | 438    | 391.5  |
| 6072   | 682.5  | 832    | 573     | 57     | 1049   | 617    |
| 105    | 181    | 268    | 251     | 25.5   | 156    | 160.5  |
| 244    | 439    | 455    | 385     | 39     | 273.5  | 319.5  |
| 554.5  | 616    | 757    | 1056    | 800.5  | 630.5  | 643    |
| 467.5  | 324    | 353    | 343     | 45     | 337    | 255    |
| 1567   | 449    | 484    | 772.5   | 52     | 296    | 305    |
| 685    | 893    | 1036   | 1725    | 32985  | 1213.5 | 375    |
| 879.5  | 593    | 710    | 2363    | 116    | 626    | 622    |
| 249    | 258.5  | 351.5  | 13984.5 | 62     | 443    | 254    |
| 433    | 556    | 560    | 335.5   | 45     | 299    | 491    |
| 369    | 192.5  | 263    | 1940    | 196    | 1706   | 159    |
| 262    | 340    | 441.5  | 742     | 49     | 768    | 240    |
| 10708  | 679    | 835    | 440     | 37     | 670    | 198.5  |
| 365    | 360    | 526.5  | 688     | 54     | 484    | 602.5  |
| 180    | 248.5  | 282    | 1006.5  | 4304   | 205.5  | 558    |
| 6929   | 1686   | 1741   | 2383    | 132    | 1748   | 935    |
| 183.5  | 148.5  | 300    | 552.5   | 67.5   | 231    | 338    |
| 208    | 235.5  | 274.5  | 740     | 48     | 205.5  | 199.5  |
| 486    | 719    | 787    | 1172.5  | 23995  | 929    | 275.5  |
| 229.5  | 271    | 351    | 327     | 48     | 216    | 226    |
| 150    | 111    | 119    | 207     | 25.5   | 67.5   | 119    |
| 320    | 220    | 255.5  | 336.5   | 54     | 417    | 256    |
| 204    | 198    | 259.5  | 818     | 825    | 279    | 1176.5 |
| 381.5  | 383.5  | 411.5  | 2425    | 661.5  | 798    | 300    |
| 221    | 201    | 213.5  | 573     | 76     | 391    | 166    |
| 331    | 314.5  | 394    | 1236.5  | 55     | 481    | 713    |
| 779    | 692    | 624    | 2156.5  | 171    | 671    | 344    |
| 90     | 122.5  | 140    | 602     | 28.5   | 2204   | 89     |
| 8793   | 2472.5 | 2605   | 4487.5  | 126.5  | 2646   | 4184   |
| 258.5  | 242.5  | 272.5  | 461     | 170    | 304    | 281.5  |
| 1718   | 2364.5 | 2905.5 | 878     | 41     | 1353.5 | 1260   |
| 306    | 339    | 1480   | 898     | 40     | 383    | 273    |
| 3411.5 | 651    | 635.5  | 475     | 40     | 376    | 306    |
| 1709   | 2010   | 1884   | 1831    | 103    | 2306.5 | 2628.5 |
| 299    | 865    | 896    | 339     | 37.5   | 184    | 222    |
| 554.5  | 900.5  | 981    | 717     | 2581.5 | 3192.5 | 335    |
| 425    | 515.5  | 521.5  | 713.5   | 9200   | 516    | 275    |

|        |        |        |        |       |        |        |
|--------|--------|--------|--------|-------|--------|--------|
| 133    | 163    | 226.5  | 335    | 139   | 294    | 203.5  |
| 316    | 495.5  | 646    | 1037   | 77    | 882    | 345    |
| 302    | 400    | 388    | 479    | 42    | 13111  | 239    |
| 1140   | 1144   | 1224   | 644    | 55    | 1384   | 4735.5 |
| 404    | 481    | 492.5  | 18671  | 54    | 390    | 905    |
| 663    | 778    | 939    | 1009   | 196.5 | 2860   | 530    |
| 20     | 22.5   | 22     | 49     | 16    | 15     | 14     |
| 365    | 389    | 425.5  | 494    | 544.5 | 546    | 337    |
| 1305   | 1362.5 | 1243   | 2776.5 | 109   | 1423   | 3733   |
| 170    | 192    | 242    | 350    | 232   | 465    | 221    |
| 138.5  | 152.5  | 189.5  | 1287   | 32    | 207.5  | 214    |
| 789    | 176    | 331.5  | 586    | 28    | 5642.5 | 128    |
| 363    | 440    | 478    | 503    | 1942  | 569    | 206    |
| 203    | 213.5  | 248    | 4158.5 | 651   | 167.5  | 193    |
| 150    | 127.5  | 138    | 3868   | 22    | 162.5  | 78     |
| 1870   | 540.5  | 663.5  | 851    | 110.5 | 973    | 281    |
| 277    | 218    | 274    | 10082  | 30    | 366.5  | 346.5  |
| 14485  | 1255   | 1286   | 2019.5 | 6872  | 1298.5 | 385.5  |
| 375    | 392.5  | 521.5  | 762    | 55    | 460    | 3531   |
| 1328   | 795    | 865    | 827.5  | 126   | 2540   | 2004   |
| 649    | 1229.5 | 965    | 2232   | 34690 | 1860.5 | 396.5  |
| 459.5  | 565    | 1085.5 | 908    | 5114  | 571.5  | 349    |
| 1086   | 440    | 489    | 973    | 4655  | 579    | 383    |
| 962    | 813    | 735    | 721    | 76    | 1685   | 333    |
| 1771   | 1324.5 | 1158   | 1576.5 | 221   | 656    | 1334   |
| 380    | 589    | 820    | 895    | 61    | 585.5  | 370    |
| 652    | 554    | 692.5  | 1223.5 | 69    | 1502   | 963    |
| 383    | 346    | 408    | 446.5  | 44    | 269    | 447.5  |
| 1559.5 | 276.5  | 320    | 593    | 50    | 182.5  | 397    |
| 1851   | 407    | 504.5  | 1164   | 64    | 310.5  | 455.5  |
| 3552   | 359.5  | 284    | 1358   | 42    | 226    | 548    |
| 131    | 151.5  | 207    | 636    | 70    | 639    | 152    |
| 341    | 276    | 286    | 303.5  | 65    | 340    | 215.5  |
| 610.5  | 427    | 520    | 602    | 62    | 1170   | 493    |
| 436    | 655.5  | 692    | 485.5  | 58    | 312    | 362    |
| 156    | 200    | 205    | 471    | 140   | 316    | 201.5  |
| 646.5  | 990    | 1082.5 | 1756   | 382   | 1027   | 517    |
| 2213   | 1303   | 1479   | 2191   | 51    | 376    | 574    |
| 76     | 67     | 81.5   | 234    | 22    | 61     | 98.5   |
| 663.5  | 835    | 805    | 1594   | 417   | 1746   | 307    |
| 194    | 163.5  | 193    | 447    | 56    | 621    | 197    |
| 397    | 457    | 580    | 636.5  | 46    | 304.5  | 1186   |
| 377.5  | 480    | 620    | 1176   | 61    | 819    | 409    |
| 3005.5 | 617.5  | 640.5  | 587    | 57    | 972    | 379    |
| 153    | 210    | 306.75 | 337    | 24.75 | 218.25 | 233    |

| 67_Rv1837c_ | 68_Rv1860_A | 69_Rv1886c_ | 70_Rv1926c_ | 71_Rv1980c_ | 72_Rv1984_A | 73_Rv1984c_ |
|-------------|-------------|-------------|-------------|-------------|-------------|-------------|
| 856         | 452         | 495.5       | 141         | 898         | 636         | 714         |
| 620         | 734         | 244         | 106.5       | 136         | 354         | 376         |
| 1148.5      | 755         | 543         | 254.5       | 5348.5      | 765.5       | 805.5       |
| 488         | 291.5       | 327         | 106         | 170         | 486         | 602         |
| 921.5       | 308         | 302         | 117         | 318         | 569         | 617.5       |
| 1076        | 3878        | 568         | 143         | 482         | 912         | 1058        |
| 1250.5      | 326         | 554         | 147         | 425         | 1573        | 1215        |
| 499         | 1364        | 302         | 280         | 112         | 450         | 1373        |
| 1397        | 3328        | 411.5       | 345         | 656         | 770.5       | 738.5       |
| 4068.5      | 1182        | 618.5       | 307         | 782         | 1109        | 1209.5      |
| 892         | 694         | 664         | 269         | 3755.5      | 877         | 5469.5      |
| 608         | 339         | 412         | 165         | 134         | 454.5       | 526         |
| 438         | 207         | 362.5       | 108         | 1355        | 445         | 485.5       |
| 550.5       | 335         | 1203        | 234         | 746         | 689         | 690         |
| 1223.5      | 15381.5     | 666.5       | 375         | 2198        | 618         | 812         |
| 1890        | 137         | 227.5       | 94          | 130         | 364.5       | 282.5       |
| 268         | 173         | 175.5       | 63          | 542         | 197         | 312         |
| 8303        | 459         | 931         | 161         | 2041        | 705         | 785.5       |
| 446         | 852         | 548         | 322         | 811         | 626         | 1280        |
| 9329        | 1351        | 919         | 1147        | 289         | 971         | 854         |
| 3075.5      | 794         | 466         | 241.5       | 1568        | 528         | 611         |
| 16795.5     | 6704        | 1679.5      | 3173.5      | 1199        | 1442        | 1457        |
| 418.5       | 28432.5     | 346         | 275         | 762         | 693         | 391         |
| 355         | 573         | 334         | 153         | 237         | 732         | 387         |
| 178         | 523         | 91          | 148.5       | 184         | 359.5       | 129         |
| 295         | 216         | 138         | 71          | 321         | 287         | 187         |
| 448         | 204         | 295         | 102         | 312         | 599         | 420         |
| 1037        | 7661        | 650.5       | 511         | 698         | 673         | 875         |
| 7093        | 25550.5     | 989         | 282         | 1393        | 972.5       | 945         |
| 1343.5      | 5228        | 1823.5      | 957         | 13929       | 1247.5      | 2858        |
| 271         | 155.5       | 208         | 93          | 1259        | 275         | 911.5       |
| 293         | 329.5       | 228         | 76          | 704         | 361         | 345         |
| 384.5       | 421.5       | 212         | 221.5       | 1118        | 438         | 475         |
| 227         | 165         | 192.5       | 62          | 143         | 292         | 323.5       |
| 279         | 127         | 247         | 210         | 256         | 319         | 316         |
| 249.5       | 189         | 208         | 117         | 500         | 290         | 270         |
| 739         | 757         | 1151        | 266         | 2017.5      | 988         | 1241        |
| 343         | 500         | 189.5       | 211         | 1145        | 485.5       | 308.5       |
| 126.5       | 89          | 65          | 118.5       | 108         | 134         | 94          |
| 218.5       | 179         | 124.5       | 827         | 399         | 199         | 194         |
| 494         | 324         | 352         | 176.5       | 324         | 484         | 372         |
| 376         | 350         | 374         | 205         | 2398        | 584.5       | 474         |
| 180.5       | 207         | 108         | 70          | 346         | 280         | 163         |
| 399         | 635         | 261         | 140         | 4006        | 590.5       | 418         |
| 569         | 368         | 448         | 141         | 209         | 714         | 474.5       |
| 19350.5     | 757         | 2593        | 377         | 2156        | 1361.5      | 1470.5      |
| 1080        | 2333        | 793.5       | 644         | 170.5       | 1087.5      | 1284        |
| 367.5       | 169         | 244         | 280         | 145         | 449         | 415.5       |
| 1157        | 216         | 330         | 258         | 1074        | 524         | 415         |



|        |         |        |        |        |        |        |
|--------|---------|--------|--------|--------|--------|--------|
| 265.5  | 407     | 287    | 156    | 5299   | 329    | 793    |
| 354    | 114     | 149    | 48     | 104    | 236    | 284.5  |
| 467.5  | 10551   | 335    | 141    | 211    | 569    | 505    |
| 1240   | 648     | 840    | 888    | 235    | 1272   | 844    |
| 1962   | 731.5   | 431    | 103    | 514.5  | 515    | 517.5  |
| 10494  | 9899    | 1051   | 479    | 407    | 896    | 642    |
| 348    | 98      | 130    | 138    | 141    | 373    | 213    |
| 285    | 98      | 102    | 61     | 289.5  | 226    | 241    |
| 188    | 291.5   | 118.5  | 812    | 159    | 214    | 204    |
| 256    | 194     | 153.5  | 90     | 1942   | 227    | 244    |
| 684    | 596     | 494    | 107    | 301    | 660.5  | 478    |
| 196    | 113.5   | 109    | 92     | 207.5  | 210    | 167.5  |
| 596    | 1058    | 408    | 109.5  | 590    | 582    | 1305.5 |
| 6752.5 | 1420    | 676.5  | 131    | 610    | 764    | 875.5  |
| 268    | 74      | 85     | 111    | 229.5  | 322    | 245    |
| 287    | 2044.5  | 187.5  | 132    | 647    | 344    | 259    |
| 846    | 249     | 413    | 226    | 238.5  | 659    | 403    |
| 330.5  | 282.5   | 233    | 130.5  | 849    | 390    | 503    |
| 430    | 258     | 333    | 452    | 823.5  | 445    | 457    |
| 457    | 6288.5  | 405    | 198    | 312    | 633    | 469    |
| 715    | 308     | 485    | 670    | 1720   | 675    | 505.5  |
| 418.5  | 1358    | 362.5  | 123    | 701.5  | 407    | 626.5  |
| 9269   | 3848    | 709    | 87     | 287    | 651    | 575    |
| 1603   | 96.5    | 182    | 87     | 201.5  | 366    | 479    |
| 261    | 238     | 182    | 118    | 1322.5 | 462.5  | 307.5  |
| 462    | 4422.5  | 705    | 149.5  | 1790.5 | 412    | 344.5  |
| 607    | 234     | 348    | 208.5  | 158    | 636.5  | 1661   |
| 168.5  | 226     | 159    | 171    | 1542   | 166.5  | 225    |
| 1127   | 546.5   | 1024.5 | 609    | 1104   | 1463   | 967    |
| 168    | 207     | 99     | 124    | 410    | 249    | 156    |
| 290    | 351     | 122    | 123    | 173    | 259    | 170.5  |
| 389    | 869     | 428.5  | 284    | 329.5  | 434.5  | 382    |
| 295.5  | 333     | 302.5  | 6292   | 323    | 506.5  | 413    |
| 152    | 138     | 150    | 34     | 3659.5 | 175.5  | 188    |
| 280    | 10852   | 194    | 130.5  | 274    | 279    | 291    |
| 363    | 311     | 149    | 92     | 167.5  | 210    | 291    |
| 317    | 2435    | 304.5  | 555    | 2226   | 425.5  | 300    |
| 189.5  | 217.5   | 159    | 6190   | 1048   | 207.5  | 572    |
| 392    | 351     | 228    | 995.5  | 514.5  | 392    | 329    |
| 641.5  | 371.5   | 392.5  | 509    | 244    | 672    | 396    |
| 141    | 203.5   | 106    | 53     | 3466   | 140.5  | 159.5  |
| 2239   | 10540.5 | 3998   | 1743.5 | 33307  | 3056   | 6366.5 |
| 238.5  | 385     | 199    | 86     | 162.5  | 271    | 247.5  |
| 1815.5 | 1278    | 954    | 347    | 102    | 2435   | 4430   |
| 270    | 205     | 187    | 165    | 240    | 3858.5 | 269    |
| 519    | 247     | 320.5  | 88.5   | 130    | 485    | 430.5  |
| 2908   | 4033    | 3876   | 1948   | 33745  | 2313   | 6823   |
| 288    | 157     | 209    | 84     | 280    | 329.5  | 311    |
| 475    | 518     | 321    | 150    | 733    | 540    | 377    |
| 301    | 279     | 298.5  | 426    | 417    | 432    | 455    |

|         |        |        |        |        |       |        |
|---------|--------|--------|--------|--------|-------|--------|
| 159     | 131    | 129.5  | 248.5  | 611.5  | 264   | 175    |
| 388     | 224    | 206    | 258    | 365.5  | 526   | 391.5  |
| 403     | 342    | 243    | 7725.5 | 1882   | 317   | 641    |
| 1452    | 6305.5 | 859    | 176    | 818    | 997   | 1186.5 |
| 447     | 389    | 292    | 132    | 2597   | 513   | 516.5  |
| 695     | 772    | 622    | 405.5  | 804    | 913   | 758    |
| 20      | 14     | 11     | 8      | 31     | 20    | 14     |
| 404.5   | 406    | 441    | 262    | 2252.5 | 413   | 571.5  |
| 13687.5 | 6750   | 6202   | 2029   | 36373  | 2674  | 6882   |
| 194.5   | 1139   | 138    | 72     | 190    | 249   | 294    |
| 158.5   | 183    | 107    | 76     | 108    | 218   | 180    |
| 347     | 108    | 112    | 127    | 348    | 248   | 591    |
| 326     | 1695.5 | 226    | 144    | 521    | 352   | 400    |
| 163     | 259    | 157    | 84     | 309    | 191   | 209    |
| 125     | 59     | 58     | 90     | 84     | 129   | 79     |
| 305.5   | 292    | 256    | 121    | 841    | 470.5 | 367    |
| 231.5   | 148    | 174    | 451    | 130    | 297   | 406.5  |
| 586     | 503    | 578    | 205.5  | 2014   | 469   | 594    |
| 393     | 223    | 204    | 213    | 146    | 475   | 259.5  |
| 8309.5  | 5104   | 3124   | 35635  | 4976.5 | 1419  | 4082   |
| 393     | 942.5  | 423    | 203.5  | 150    | 495.5 | 482.5  |
| 479     | 275    | 287    | 377    | 703    | 879.5 | 606    |
| 310.5   | 193    | 226    | 238.5  | 397    | 379   | 325    |
| 864     | 7166   | 560    | 905.5  | 307    | 789   | 672    |
| 19834.5 | 595    | 1695.5 | 325    | 939    | 1342  | 1340   |
| 433.5   | 289    | 279    | 128    | 366    | 775   | 312    |
| 659.5   | 2764   | 1631.5 | 735    | 31071  | 973   | 3146   |
| 790     | 2372   | 258    | 276    | 675    | 368.5 | 420    |
| 223     | 162    | 231.5  | 180    | 106.5  | 221.5 | 246    |
| 409     | 219.5  | 267.5  | 180    | 444.5  | 424.5 | 1717   |
| 7059.5  | 495    | 838.5  | 127    | 226    | 578   | 596.5  |
| 217.5   | 278.5  | 156    | 85.5   | 1798   | 161.5 | 288.5  |
| 258     | 427.5  | 149    | 206    | 235    | 334   | 344    |
| 234.5   | 492.5  | 259    | 143    | 2143   | 217.5 | 393    |
| 511     | 553.5  | 406    | 22866  | 173    | 717   | 629    |
| 236     | 390    | 270    | 6627   | 1534.5 | 232   | 429.5  |
| 981     | 345.5  | 573    | 370    | 394    | 887   | 671    |
| 1111.5  | 212    | 534    | 115.5  | 142    | 498   | 305    |
| 65      | 191    | 43     | 68     | 339    | 49    | 76     |
| 577     | 445    | 309    | 133    | 3714.5 | 328   | 452    |
| 211     | 936    | 211.5  | 289    | 2087   | 201   | 284.5  |
| 368     | 717    | 257    | 169    | 677    | 502   | 439    |
| 439     | 17218  | 303    | 4918   | 390    | 612.5 | 495    |
| 1544    | 292    | 310    | 766    | 476.5  | 576   | 380    |
| 248.25  | 70     | 130.5  | 37.5   | 130.5  | 195   | 308.5  |

| 74_Rv2031c_ | 75_Rv2094c_ | 76_Rv2151_A | 77_Rv2252 lo | 78_Rv2282c_ | 79_Rv2282_A | 80_Rv2544_A |
|-------------|-------------|-------------|--------------|-------------|-------------|-------------|
| 125         | 653         | 309.5       | 708          | 409.5       | 1790        | 509.5       |
| 30          | 179.5       | 225.5       | 385          | 189         | 625         | 2105        |
| 112         | 467         | 191         | 886.5        | 425         | 1813        | 1139.5      |
| 71          | 354         | 164         | 480          | 235.5       | 689         | 312.5       |
| 84          | 213         | 481         | 481.5        | 461.5       | 914         | 1386        |
| 300         | 12938       | 607.5       | 1574         | 897.5       | 2179.5      | 1003.5      |
| 800.5       | 971         | 239         | 1564         | 730         | 3925        | 666         |
| 121         | 974         | 162         | 441          | 265.5       | 976.5       | 1767.5      |
| 98.5        | 555.5       | 2460.5      | 1188         | 849         | 2413        | 614         |
| 106         | 1774.5      | 6005        | 2427         | 1396        | 1292.5      | 1096        |
| 96          | 1847.5      | 324.5       | 928          | 556         | 902.5       | 858         |
| 63          | 418         | 568         | 565          | 319         | 557         | 252.5       |
| 42          | 234         | 123         | 528          | 299         | 612         | 241         |
| 1165        | 290         | 306         | 782          | 525         | 818         | 292         |
| 2055        | 817.5       | 203.5       | 747          | 754         | 775         | 608         |
| 49          | 339         | 904         | 421          | 247         | 373         | 186.5       |
| 28          | 148.5       | 54          | 251          | 166         | 281         | 137         |
| 64          | 404.5       | 1010        | 498.5        | 336         | 666         | 221         |
| 117         | 498         | 207         | 662          | 423.5       | 817         | 310         |
| 154.5       | 2080        | 189         | 892          | 531         | 1301        | 364         |
| 42          | 375         | 125         | 462.5        | 330         | 730.5       | 182         |
| 2359.5      | 846         | 204         | 1012         | 781         | 1139        | 529.5       |
| 81          | 386         | 99          | 506.5        | 430         | 655         | 188         |
| 12982       | 329         | 112         | 839.5        | 1301        | 948         | 892         |
| 29          | 205         | 617         | 235          | 183         | 593.5       | 126         |
| 114         | 142         | 66          | 336          | 170.5       | 913.5       | 138         |
| 69          | 331         | 159.5       | 594.5        | 363         | 602         | 246.5       |
| 73          | 1160        | 155         | 690          | 376         | 857.5       | 483.5       |
| 89          | 651         | 173         | 1003         | 584.5       | 942         | 678         |
| 186         | 1126        | 293.5       | 1056         | 823         | 1565        | 437         |
| 41          | 209         | 73          | 390          | 210         | 547         | 151         |
| 56          | 354         | 88          | 405          | 183.5       | 398         | 156         |
| 40          | 434         | 86          | 613          | 300         | 555         | 195         |
| 153         | 243.5       | 58.5        | 310.5        | 178         | 325         | 121         |
| 44          | 246         | 88          | 271          | 287.5       | 472         | 159         |
| 34          | 868         | 271.5       | 387          | 258.5       | 339         | 168         |
| 34298       | 998         | 259         | 2037         | 3899        | 2486        | 1057        |
| 2294        | 172         | 173.5       | 695          | 585         | 413         | 194         |
| 22          | 80          | 34          | 171          | 78.5        | 186         | 56          |
| 1303        | 466         | 65          | 412.5        | 215         | 213.5       | 370         |
| 1066        | 374         | 105         | 588          | 486         | 676.5       | 893         |
| 83          | 1717        | 97          | 4743.5       | 329.5       | 582         | 252.5       |
| 40          | 137         | 85          | 319.5        | 161         | 271         | 104         |
| 58          | 239         | 105         | 532          | 354         | 479         | 387         |
| 150.5       | 243         | 141         | 690          | 436         | 686         | 327.5       |
| 974         | 1000        | 130.5       | 1245         | 716         | 1634.5      | 1169        |
| 159         | 1504        | 343.5       | 1426         | 1275        | 1905        | 1244        |
| 58          | 221         | 94          | 362          | 205         | 460         | 241         |
| 791.5       | 1600        | 100         | 522          | 447         | 473         | 459         |

|      |        |       |        |        |        |        |
|------|--------|-------|--------|--------|--------|--------|
| 79   | 139.5  | 81    | 315    | 179    | 364    | 250    |
| 24   | 733    | 54    | 354    | 161    | 320.5  | 207    |
| 1268 | 531    | 466   | 743    | 928    | 633    | 321    |
| 1084 | 496    | 560   | 1540.5 | 987.5  | 2848   | 775    |
| 60.5 | 341    | 81    | 658.5  | 364    | 611    | 597    |
| 4030 | 566    | 94    | 565    | 446    | 728    | 215.5  |
| 79   | 398    | 76    | 273.5  | 151    | 282.5  | 157    |
| 110  | 3228.5 | 66    | 285    | 162.5  | 244    | 110    |
| 88   | 334    | 63.5  | 251.5  | 147.5  | 219    | 176    |
| 164  | 197    | 85    | 295.5  | 137.5  | 207    | 130    |
| 421  | 398.5  | 655   | 1141   | 596    | 605    | 353    |
| 50   | 472.5  | 108   | 364    | 230.5  | 1071   | 148    |
| 44.5 | 1137   | 187   | 775.5  | 480    | 766.5  | 1095   |
| 285  | 2071   | 149.5 | 715    | 441    | 695    | 1343   |
| 66   | 311    | 61    | 451    | 180    | 163.5  | 108.5  |
| 53   | 644    | 214   | 350.5  | 280    | 325    | 192    |
| 91   | 344    | 264.5 | 977.5  | 486    | 804    | 306    |
| 35   | 168    | 84    | 717.5  | 314.5  | 354.5  | 235    |
| 44   | 446    | 95    | 546.5  | 310.5  | 707    | 269    |
| 91   | 255    | 151.5 | 589    | 380    | 765    | 649    |
| 151  | 383    | 307   | 729    | 440    | 842    | 484    |
| 37   | 181    | 238.5 | 445    | 251    | 496    | 221    |
| 36   | 507.5  | 127   | 616    | 327.5  | 650    | 509    |
| 27   | 203    | 78    | 367    | 150    | 307    | 98     |
| 89   | 172.5  | 234   | 453.5  | 272    | 523    | 658    |
| 69   | 299.5  | 344   | 408    | 294    | 607    | 710.5  |
| 1745 | 237    | 113   | 521    | 398    | 566    | 248    |
| 174  | 292    | 909   | 256    | 275    | 325    | 96     |
| 236  | 661    | 577   | 1852   | 958    | 2038   | 837    |
| 44   | 414    | 50    | 212    | 109    | 306    | 83     |
| 41.5 | 268    | 86    | 283    | 147    | 292    | 184    |
| 3569 | 268    | 880   | 523.5  | 610    | 697    | 191    |
| 43.5 | 174    | 263   | 314    | 213    | 406    | 207    |
| 32   | 127    | 34    | 200    | 101    | 217.5  | 69     |
| 39   | 184.5  | 103   | 323    | 163    | 293    | 131.5  |
| 515  | 310    | 206.5 | 302    | 152    | 322    | 276    |
| 69   | 500.5  | 856   | 439    | 397    | 565    | 240    |
| 66   | 126    | 69    | 274.5  | 135    | 334    | 89     |
| 761  | 389    | 113   | 483    | 288    | 436    | 347    |
| 76   | 288    | 201   | 1109   | 520.5  | 1156   | 271    |
| 32   | 142    | 57    | 189.5  | 98.5   | 249.5  | 110    |
| 364  | 778    | 911   | 2172   | 1946.5 | 3868   | 1178.5 |
| 45   | 401    | 79.5  | 381    | 194.5  | 458    | 181    |
| 42   | 9585   | 150   | 3105.5 | 1762   | 2510   | 2235.5 |
| 71   | 385    | 106   | 433    | 254.5  | 1295   | 176    |
| 44   | 351.5  | 149.5 | 544    | 335    | 525.5  | 341    |
| 892  | 1033.5 | 572   | 1976   | 1673.5 | 3143.5 | 873    |
| 2226 | 360    | 235   | 441    | 441    | 450.5  | 208    |
| 72   | 754    | 124   | 730    | 447    | 812.5  | 857.5  |
| 8747 | 367    | 280   | 604    | 865    | 697.5  | 343    |

|         |        |       |        |        |        |        |
|---------|--------|-------|--------|--------|--------|--------|
| 120     | 285    | 321.5 | 219    | 168    | 262    | 116    |
| 97      | 426.5  | 240   | 685    | 418    | 764    | 288    |
| 34      | 139.5  | 163   | 353    | 226    | 432    | 132    |
| 80      | 3351   | 156   | 1227   | 761    | 1262   | 1064   |
| 187.5   | 1884   | 123   | 650.5  | 305.5  | 729    | 415    |
| 86.5    | 705.5  | 333   | 898.5  | 600    | 1024.5 | 459    |
| 7       | 19     | 11    | 33     | 19     | 30     | 10     |
| 4943.5  | 246.5  | 127   | 509    | 454    | 613    | 320    |
| 535     | 1269.5 | 589   | 1911   | 1566.5 | 3058   | 866    |
| 30      | 178.5  | 64    | 341    | 206    | 227.5  | 145    |
| 33      | 151    | 117   | 318.5  | 145.5  | 235    | 155    |
| 38      | 131    | 107   | 209    | 135    | 305    | 117    |
| 224     | 699    | 126   | 531    | 259    | 634    | 342    |
| 4302    | 289    | 90.5  | 374    | 468    | 360    | 190    |
| 13      | 44     | 29    | 118    | 64     | 117.5  | 45     |
| 173     | 376    | 239   | 471    | 307    | 535    | 428    |
| 62      | 238    | 76    | 367    | 199    | 363    | 129.5  |
| 6003.5  | 363    | 128   | 637    | 1027   | 911.5  | 762.5  |
| 74      | 185    | 451   | 744    | 360    | 688    | 236    |
| 7479    | 556    | 243   | 1273   | 2000.5 | 1855   | 695.5  |
| 3463.5  | 207.5  | 135   | 548.5  | 532    | 722    | 238    |
| 200     | 348    | 246   | 837    | 424    | 1590   | 326.5  |
| 72      | 386    | 225   | 949    | 239    | 464.5  | 250    |
| 1522.5  | 471    | 151   | 1393   | 729    | 985    | 342    |
| 130.5   | 1260   | 450   | 1168.5 | 915.5  | 1464.5 | 581.5  |
| 50      | 245.5  | 144.5 | 656    | 423    | 574    | 377    |
| 199     | 346.5  | 810   | 833    | 759.5  | 1259   | 373    |
| 82      | 185    | 3990  | 396    | 471    | 505    | 212.5  |
| 18279   | 334    | 124   | 665.5  | 1767   | 1718.5 | 370    |
| 70      | 241.5  | 3127  | 502.5  | 485.5  | 599    | 300    |
| 5665    | 725    | 62    | 486.5  | 495    | 511    | 268    |
| 90      | 1181   | 61.5  | 184    | 143.5  | 237    | 105.5  |
| 38      | 462    | 103   | 407    | 198    | 277.5  | 156    |
| 29584.5 | 350    | 120   | 779    | 2818   | 1031   | 740.5  |
| 62.5    | 844    | 102   | 929    | 427    | 669    | 572    |
| 230.5   | 752    | 103   | 261    | 175    | 306    | 152    |
| 180     | 590    | 432   | 1222   | 750    | 1653.5 | 514    |
| 62      | 215    | 300   | 668    | 325    | 1566.5 | 300    |
| 30      | 86     | 36    | 77     | 44     | 80     | 41     |
| 35.5    | 568.5  | 58    | 502    | 247    | 1130   | 524    |
| 51      | 207.5  | 80    | 318    | 164    | 325.5  | 1342   |
| 53.5    | 392    | 269.5 | 565    | 284.5  | 578    | 1871   |
| 66      | 1533   | 919   | 775.5  | 477    | 728.5  | 715    |
| 73      | 1114   | 133   | 663    | 349    | 507    | 339    |
| 40.5    | 286.25 | 36.25 | 295.5  | 143    | 337.75 | 175.75 |

| 81_Rv2618_A | 82_Rv2870_A | 83_Rv2870_A | 84_Rv2873_A | 85_Rv2875_A | 86_Rv2927_A | 87_Rv2984_A |
|-------------|-------------|-------------|-------------|-------------|-------------|-------------|
| 98          | 771         | 862         | 141         | 426.5       | 3297        | 828         |
| 71          | 441.5       | 2695        | 93          | 243         | 5083.5      | 577         |
| 155         | 799.5       | 1599        | 260         | 622         | 3754.5      | 1134.5      |
| 1221        | 493         | 497         | 115         | 195.5       | 1670.5      | 728         |
| 291         | 771         | 1307        | 168         | 543         | 2986        | 818.5       |
| 858         | 1010        | 941         | 348         | 2635.5      | 4583        | 1095        |
| 1386        | 1740        | 983         | 313         | 496         | 4340        | 2471        |
| 99          | 536         | 3889        | 100         | 807.5       | 3161        | 821         |
| 369         | 921         | 1347        | 412         | 784         | 8602.5      | 1268        |
| 310.5       | 1233        | 1764.5      | 548         | 1201        | 8868.5      | 1323        |
| 300         | 890         | 1097        | 140         | 604         | 4396        | 1032.5      |
| 84          | 543.5       | 494         | 1234        | 520         | 2549.5      | 834.5       |
| 74          | 459         | 467.5       | 141         | 174         | 2988        | 557         |
| 93          | 963         | 476         | 234         | 431         | 1978        | 982         |
| 141         | 559         | 593         | 640         | 1403        | 2615        | 728         |
| 82          | 467.5       | 293.5       | 470         | 353         | 826         | 512.5       |
| 50          | 432         | 310         | 17040.5     | 17495       | 930.5       | 296.5       |
| 229         | 413         | 334         | 80          | 220         | 1490        | 617         |
| 529         | 898.5       | 655         | 257         | 363         | 1715        | 978         |
| 112         | 924         | 713         | 171         | 823         | 2637.5      | 1290.5      |
| 76          | 307         | 258         | 108         | 268.5       | 1667.5      | 438         |
| 109         | 1186        | 796         | 13140       | 591         | 2886        | 1403        |
| 184.5       | 652         | 346.5       | 99          | 242         | 1367        | 1237        |
| 82          | 829         | 805         | 241         | 321         | 1271.5      | 1386        |
| 88          | 303         | 149         | 79.5        | 122         | 687         | 298         |
| 67          | 257.5       | 227         | 106         | 131         | 1461.5      | 490.5       |
| 86          | 784.5       | 507         | 262         | 358         | 2069.5      | 785         |
| 135         | 761         | 557.5       | 2377        | 578         | 3300        | 891         |
| 178         | 920         | 893.5       | 248         | 418         | 4048        | 909         |
| 261         | 864         | 679         | 366         | 451.5       | 5442        | 1335.5      |
| 190         | 346         | 305         | 451         | 256         | 2253.5      | 558         |
| 148         | 366         | 220         | 98          | 175         | 803         | 1092        |
| 76          | 543.5       | 394         | 858         | 5638        | 1967.5      | 663         |
| 109         | 288         | 175.5       | 200         | 534         | 820         | 396         |
| 72          | 352         | 220         | 65          | 268         | 1434.5      | 456         |
| 147         | 277         | 235.5       | 750         | 294         | 1609        | 366.5       |
| 113         | 1144        | 888.5       | 599         | 1668        | 3083.5      | 1525        |
| 61          | 382         | 255         | 92          | 141         | 1551        | 516         |
| 38          | 144         | 87          | 69          | 46.5        | 537         | 205         |
| 59          | 222.5       | 363.5       | 1059.5      | 219         | 654         | 233.5       |
| 107         | 792         | 1086        | 34345       | 23050       | 6004        | 706         |
| 77          | 694         | 390         | 117         | 6100        | 1978.5      | 845         |
| 83          | 381         | 196         | 126         | 132         | 1015        | 374.5       |
| 106         | 547         | 664         | 4566        | 189         | 1819        | 763.5       |
| 119         | 698         | 619         | 225         | 278         | 2831        | 929.5       |
| 142.5       | 1005        | 1795        | 4516        | 588         | 3505.5      | 1152        |
| 1948.5      | 1611        | 1598.5      | 31763       | 19639       | 4683.5      | 2258        |
| 77.5        | 508.5       | 284         | 93          | 256         | 1159        | 633         |
| 81          | 595         | 450         | 427         | 359.5       | 3445        | 619         |

|       |        |        |        |         |        |        |
|-------|--------|--------|--------|---------|--------|--------|
| 130   | 334    | 335    | 107    | 117     | 1722   | 497    |
| 42    | 255.5  | 292    | 55     | 744     | 770    | 333.5  |
| 463   | 815    | 601    | 9771.5 | 5647.5  | 4917   | 820    |
| 297.5 | 1456.5 | 1201.5 | 524    | 8595    | 7145   | 2895.5 |
| 511.5 | 530    | 694    | 114    | 1163    | 2319   | 666    |
| 128.5 | 435    | 339    | 3478   | 280.5   | 2138   | 551    |
| 78    | 385    | 202    | 790    | 183     | 5423   | 549    |
| 79    | 241    | 176    | 1894   | 122     | 2297   | 354.5  |
| 634   | 256    | 294    | 1328   | 201     | 1888.5 | 257    |
| 54    | 280    | 177    | 74     | 112.5   | 3900   | 279.5  |
| 157   | 692    | 652    | 336    | 314.5   | 5153   | 772    |
| 100   | 353    | 584    | 256    | 233     | 1663   | 325    |
| 144   | 777    | 934    | 178.5  | 7173    | 4058   | 792    |
| 266   | 782.5  | 1727   | 219.5  | 578     | 1709   | 1136   |
| 66    | 283.5  | 204    | 73     | 177     | 558    | 549    |
| 84.5  | 404    | 207    | 80     | 229     | 1740   | 521    |
| 338.5 | 831    | 583    | 364    | 577     | 3031   | 1232.5 |
| 61    | 449.5  | 525    | 2353   | 25516   | 990    | 577    |
| 237   | 575    | 471    | 9249   | 6186    | 4669   | 889    |
| 162   | 782    | 1120.5 | 174    | 1294    | 3025.5 | 1033   |
| 287.5 | 677    | 679    | 271.5  | 329     | 4079   | 970    |
| 573.5 | 348.5  | 311    | 2662   | 1554    | 1738   | 477    |
| 70    | 599    | 564    | 135    | 6000    | 1770   | 558    |
| 56    | 355    | 166    | 259.5  | 281     | 1301   | 455    |
| 229   | 407    | 987.5  | 183.5  | 8836    | 1969.5 | 592.5  |
| 59    | 449.5  | 551.5  | 243    | 254     | 1115.5 | 485    |
| 96    | 653    | 451.5  | 8434.5 | 599     | 1742.5 | 853    |
| 134   | 200    | 154    | 750.5  | 1250.5  | 1738   | 433    |
| 615.5 | 1893   | 1341   | 11572  | 3773    | 8194   | 2440   |
| 47    | 325    | 113    | 576    | 174.5   | 939    | 282    |
| 211   | 254.5  | 214    | 80     | 175.5   | 2377   | 342    |
| 73    | 474    | 370.5  | 192    | 1417    | 1702.5 | 721    |
| 111   | 525    | 267    | 198    | 201     | 2876   | 755    |
| 25    | 164    | 85     | 33     | 81      | 1268   | 183    |
| 164   | 306    | 268.5  | 582    | 177     | 3575   | 398    |
| 2029  | 284.5  | 378    | 307    | 191     | 1211.5 | 367    |
| 212   | 433    | 361    | 189    | 208     | 1253   | 714    |
| 59    | 183.5  | 148    | 154    | 258     | 1045.5 | 217    |
| 571   | 385    | 432    | 2299   | 4814.5  | 2113   | 482.5  |
| 117   | 790    | 472    | 173    | 660     | 6522.5 | 1428   |
| 46    | 143    | 193    | 2216   | 128     | 681.5  | 160    |
| 391   | 2661.5 | 1661.5 | 4992   | 4288    | 10404  | 3733.5 |
| 251   | 365    | 260    | 159    | 434     | 1274   | 413    |
| 1151  | 3120   | 2621.5 | 451    | 14944.5 | 5548   | 2675   |
| 92    | 3636   | 325.5  | 443    | 958     | 1693   | 7360   |
| 81.5  | 749    | 534.5  | 209    | 268     | 1839   | 741    |
| 570.5 | 1648   | 1183.5 | 629    | 1444    | 13771  | 2800   |
| 66    | 402.5  | 245    | 200    | 167     | 894.5  | 483    |
| 107   | 701    | 1012   | 165    | 1788    | 3121   | 984.5  |
| 83    | 818    | 546    | 43219  | 12024   | 1640.5 | 716.5  |

|        |        |        |        |         |        |        |
|--------|--------|--------|--------|---------|--------|--------|
| 50.5   | 374    | 321.5  | 461    | 542     | 5590   | 491    |
| 105    | 556.5  | 473    | 311    | 301     | 3645   | 735    |
| 123    | 318    | 319    | 123    | 152.5   | 4148   | 440.5  |
| 129    | 1006   | 949    | 217    | 5957    | 3062   | 1233   |
| 88     | 527    | 548.5  | 86     | 646     | 2612.5 | 601    |
| 287    | 972    | 706    | 1946   | 1997.5  | 3332   | 1324.5 |
| 10     | 26     | 16.5   | 9      | 9       | 54     | 33     |
| 75     | 825.5  | 610    | 41260  | 17391.5 | 2972   | 769    |
| 427    | 1702   | 1069   | 376    | 20030   | 11179  | 2494   |
| 169    | 507    | 310    | 28340  | 477     | 6073   | 320    |
| 79     | 224    | 221    | 53     | 294     | 1044   | 268    |
| 54     | 502.5  | 830    | 42.5   | 101     | 1841.5 | 317    |
| 307    | 455    | 413.5  | 224    | 1493    | 3068   | 539    |
| 51     | 224    | 183    | 3565.5 | 224.5   | 3766   | 274    |
| 23     | 131.5  | 79     | 371    | 88      | 1150.5 | 146    |
| 779    | 586    | 631    | 524    | 210     | 3079   | 631    |
| 69.5   | 324.5  | 200    | 107    | 343     | 1218   | 440    |
| 90     | 493    | 662    | 797    | 438     | 1721   | 664    |
| 119    | 507    | 492    | 1125.5 | 312     | 3077   | 722    |
| 144    | 1030   | 864    | 2502.5 | 667     | 6631   | 1440   |
| 113    | 452    | 368    | 643    | 1931    | 2791   | 570    |
| 149    | 1080   | 556.5  | 1627   | 980.5   | 2990   | 1114   |
| 86     | 466    | 368    | 1161   | 7727    | 1819.5 | 510    |
| 125    | 1049   | 603    | 342    | 279     | 1748   | 1184   |
| 149    | 2179.5 | 1011   | 31440  | 15072   | 6380   | 1294   |
| 169    | 654.5  | 911.5  | 493    | 521     | 2774   | 1075   |
| 261    | 770.5  | 827    | 19823  | 7001    | 25632  | 1099.5 |
| 908    | 411    | 310    | 243.5  | 230     | 2741   | 503    |
| 42     | 248    | 249    | 145    | 265     | 924.5  | 390.5  |
| 194.5  | 514    | 407    | 455    | 390     | 3375.5 | 760.5  |
| 59     | 325    | 303    | 158    | 237     | 1008   | 328.5  |
| 344    | 162.5  | 172    | 56     | 153     | 2577.5 | 233    |
| 191    | 423    | 688    | 142    | 165.5   | 2100.5 | 547    |
| 78     | 395    | 563    | 16738  | 1025    | 1198   | 557    |
| 86.5   | 505.5  | 563    | 1370   | 3419    | 2433.5 | 682.5  |
| 74     | 202.5  | 202    | 61     | 759     | 2067   | 288    |
| 168    | 1583   | 1079.5 | 43288  | 30103   | 4624.5 | 1566.5 |
| 106.5  | 464    | 466    | 691    | 201     | 1938.5 | 545    |
| 71     | 58     | 48     | 28     | 846     | 249    | 76     |
| 65     | 305    | 461    | 653    | 1532    | 1951   | 385    |
| 263    | 209    | 1887   | 80     | 138.5   | 2169   | 245    |
| 138    | 486.5  | 3377.5 | 114    | 197     | 1650   | 584    |
| 1413.5 | 562    | 1033.5 | 3287   | 2146    | 6444   | 858    |
| 143    | 511    | 488.5  | 232.5  | 355     | 4755   | 673    |
| 40.25  | 280.5  | 214.5  | 42     | 165     | 787    | 353.75 |



| 88_Rv2984_A | 89_Rv3050_A | 90_Rv3243_A | 91_Rv3243_A | 92_Rv3248_A | 93_Rv3319_A | 94_Rv3319_A |
|-------------|-------------|-------------|-------------|-------------|-------------|-------------|
| 279.5       | 1113        | 1447        | 657.5       | 6476        | 3731        | 314         |
| 220         | 620         | 770         | 371         | 1463        | 589.5       | 178.5       |
| 382         | 3070        | 1529.5      | 825.5       | 3397        | 988.5       | 510         |
| 250         | 802         | 975         | 512.5       | 1153        | 429         | 201.5       |
| 339         | 1308        | 918         | 642         | 930.5       | 581         | 234         |
| 442.5       | 1015.5      | 1483        | 901.5       | 1583        | 979.5       | 461         |
| 410.5       | 1446        | 3144        | 1667        | 2763        | 1374.5      | 758.5       |
| 530         | 523         | 884         | 426         | 2807        | 441         | 207.5       |
| 885         | 1415        | 2159        | 930         | 6583.5      | 2624        | 807         |
| 721.5       | 1115        | 2097        | 1156        | 1647        | 1231.5      | 1017        |
| 375.5       | 833         | 1536        | 868         | 2238        | 859         | 617         |
| 663         | 1202        | 897         | 677         | 5282        | 717         | 2905        |
| 173         | 663         | 1277        | 491         | 1119.5      | 670         | 294         |
| 462         | 1353        | 1054        | 869         | 1363.5      | 910         | 772         |
| 333         | 869.5       | 872         | 596.5       | 943         | 767         | 439         |
| 188         | 514.5       | 494         | 353         | 870         | 471         | 1076        |
| 277         | 443.5       | 364         | 238         | 524.5       | 307         | 230         |
| 2246        | 622         | 759         | 432         | 7884        | 515         | 9851        |
| 492         | 1775        | 1025        | 799         | 1399        | 834         | 504.5       |
| 706         | 2997        | 1671.5      | 957         | 2200        | 1196.5      | 866         |
| 211         | 967.5       | 623         | 367         | 584         | 375         | 255         |
| 428         | 1285        | 1626        | 987         | 1750.5      | 988.5       | 554         |
| 238         | 717         | 1267.5      | 715         | 9249        | 578         | 321.5       |
| 335         | 766         | 1464        | 875         | 975         | 624         | 341         |
| 114         | 261.5       | 569         | 292         | 453         | 391.5       | 174         |
| 123         | 349         | 641         | 256         | 1284.5      | 1524        | 140         |
| 311.5       | 858         | 866         | 644         | 1161        | 645         | 343         |
| 355         | 764.5       | 1312.5      | 670         | 4139        | 687         | 475         |
| 434         | 1035        | 1272        | 803         | 1427        | 955         | 603.5       |
| 565         | 2138        | 1258        | 822         | 1629        | 911         | 446.5       |
| 235         | 1775.5      | 711         | 474         | 1134.5      | 571         | 216         |
| 1483        | 398         | 565.5       | 372         | 2256        | 422         | 210         |
| 238         | 938         | 753.5       | 426         | 890         | 567         | 210.5       |
| 200         | 494         | 547         | 284         | 636         | 329.5       | 202         |
| 153.5       | 371         | 505         | 329         | 775.5       | 336         | 175         |
| 133         | 585.5       | 521         | 295         | 1528        | 439         | 156.5       |
| 1033.5      | 3081        | 1676.5      | 1205        | 2551.5      | 1274        | 979.5       |
| 157         | 633         | 711.5       | 375         | 624.5       | 547         | 153         |
| 63          | 180         | 301         | 140.5       | 313.5       | 227         | 84          |
| 96          | 409         | 327         | 197         | 451.5       | 367         | 183.5       |
| 486         | 1108.5      | 933.5       | 578         | 1460        | 700         | 393         |
| 246         | 1463.5      | 787         | 637         | 681         | 542.5       | 247         |
| 116.5       | 490         | 429         | 250         | 1624        | 455         | 136.5       |
| 216.5       | 729         | 875         | 568         | 4259        | 678.5       | 345         |
| 300         | 1369        | 1322.5      | 701.5       | 1110        | 871         | 319.5       |
| 2075        | 1380.5      | 1982.5      | 967         | 4860        | 1854        | 917         |
| 1370.5      | 6016        | 2557        | 1514        | 3733        | 2487        | 1612.5      |
| 238         | 392.5       | 786         | 483         | 1131        | 419         | 269         |
| 248         | 643         | 782         | 448         | 830         | 568         | 302         |

|        |        |        |        |         |       |        |
|--------|--------|--------|--------|---------|-------|--------|
| 171    | 546.5  | 621    | 273    | 557.5   | 320.5 | 120    |
| 132    | 364    | 494    | 257    | 532.5   | 350.5 | 135.5  |
| 368    | 1179   | 1077   | 600    | 1349.5  | 934   | 321    |
| 1603   | 8391   | 2764   | 1621.5 | 4370    | 1968  | 1249.5 |
| 270    | 699    | 979    | 565    | 966     | 619   | 292    |
| 231    | 741.5  | 665    | 408    | 908     | 573   | 337.5  |
| 174    | 414    | 640.5  | 437    | 1983    | 383   | 184.5  |
| 133    | 302    | 377    | 191.5  | 524     | 292.5 | 94     |
| 103.5  | 253    | 371.5  | 197    | 1448    | 348   | 119    |
| 162    | 312    | 461    | 218.5  | 433.5   | 281   | 222.5  |
| 301.5  | 811.5  | 1352.5 | 656    | 4741    | 784   | 776    |
| 131    | 354    | 374    | 203    | 494     | 392   | 124    |
| 336.5  | 892    | 1055.5 | 706    | 1285    | 982   | 541    |
| 622    | 617    | 1193   | 659    | 20975.5 | 824   | 553    |
| 1465.5 | 234    | 413    | 251    | 314.5   | 315   | 60.5   |
| 294.5  | 380    | 652    | 342    | 594     | 368   | 266.5  |
| 526.5  | 2861.5 | 1322   | 921    | 1978    | 1099  | 396    |
| 389    | 526    | 578    | 344.5  | 1519    | 457   | 329    |
| 459.5  | 1230   | 979    | 620    | 4273.5  | 832   | 403    |
| 401    | 1815.5 | 1034   | 798.5  | 1455    | 830   | 324    |
| 327    | 1197   | 1367.5 | 680    | 1651    | 1142  | 366    |
| 140    | 531    | 660    | 382    | 613     | 410   | 146.5  |
| 289    | 516    | 842.5  | 538.5  | 4451    | 598   | 440    |
| 109    | 410    | 478    | 315    | 1323.5  | 298.5 | 144    |
| 213    | 586    | 750    | 399    | 776     | 615   | 186.5  |
| 201    | 422    | 698    | 424.5  | 693     | 557.5 | 280.5  |
| 266    | 951    | 1156   | 657    | 1072    | 635   | 264    |
| 323    | 967    | 341    | 161    | 398     | 228   | 115.5  |
| 1153   | 4326.5 | 2939   | 1864   | 6013    | 2647  | 1088.5 |
| 85.5   | 431    | 310    | 268    | 287     | 281.5 | 110    |
| 151.5  | 434    | 416    | 238    | 483     | 349   | 149    |
| 444.5  | 1315   | 723    | 538    | 1315    | 619   | 323    |
| 210    | 1759   | 857    | 489.5  | 557     | 438   | 272.5  |
| 56     | 198    | 375    | 156    | 284     | 176.5 | 66     |
| 146    | 443.5  | 600    | 256.5  | 473     | 355   | 123    |
| 140    | 324    | 635.5  | 243    | 2002.5  | 380   | 132.5  |
| 1295   | 679    | 697    | 457    | 590     | 497.5 | 458    |
| 138    | 300    | 392    | 158    | 466     | 411   | 91     |
| 197    | 642.5  | 678.5  | 376    | 1068    | 674   | 283    |
| 647.5  | 3853.5 | 2001   | 897    | 2189.5  | 1083  | 501    |
| 61     | 211    | 209    | 119    | 272     | 158   | 67.5   |
| 1684.5 | 5509   | 3820   | 2614   | 3254    | 2392  | 1591   |
| 187.5  | 691    | 561    | 288    | 676     | 386   | 214    |
| 1185   | 2102   | 2726   | 2695   | 2844    | 2344  | 1410   |
| 305.5  | 1966   | 7256   | 3943   | 666.5   | 995.5 | 199.5  |
| 339.5  | 669    | 947    | 633    | 870     | 567.5 | 559    |
| 1550   | 5265.5 | 2837   | 1807   | 3467    | 2061  | 1084.5 |
| 224    | 2086.5 | 592    | 360    | 644     | 413   | 274    |
| 535.5  | 1836   | 1302   | 756    | 1773    | 829   | 397    |
| 480    | 673    | 743    | 527    | 4705    | 519   | 534    |

|       |        |        |       |         |        |        |
|-------|--------|--------|-------|---------|--------|--------|
| 326   | 403    | 391    | 260   | 361     | 281    | 202    |
| 237.5 | 1773   | 1117.5 | 498   | 1154    | 722.5  | 181    |
| 173   | 658    | 568    | 281   | 545.5   | 345    | 149.5  |
| 805   | 1596   | 1560   | 1067  | 1347.5  | 1218   | 752    |
| 177   | 699.5  | 1025   | 500   | 849     | 573    | 245    |
| 613.5 | 2557   | 1538   | 1158  | 3350    | 965.5  | 674    |
| 11    | 33     | 49     | 23    | 72      | 49     | 13     |
| 673   | 673    | 692    | 429   | 997.5   | 579    | 360.5  |
| 1260  | 4656   | 2246   | 1534  | 2617    | 1821   | 915    |
| 246   | 6279.5 | 355    | 237   | 480     | 363    | 184.5  |
| 109   | 399    | 350    | 215.5 | 418     | 360.5  | 204    |
| 94.5  | 432    | 301    | 283.5 | 376     | 330    | 110    |
| 213.5 | 603.5  | 723.5  | 387   | 751     | 523    | 329    |
| 161.5 | 443    | 366    | 214   | 7162    | 353    | 217    |
| 43    | 126    | 243    | 98    | 178     | 123    | 44     |
| 240   | 1113.5 | 760    | 477   | 732     | 518.5  | 185.5  |
| 171   | 403.5  | 547    | 291   | 3487    | 341    | 160    |
| 361.5 | 692    | 699    | 554   | 3346    | 690    | 396    |
| 277   | 1570   | 861    | 531   | 1157    | 756    | 288    |
| 719   | 1774.5 | 1434   | 1065  | 1801    | 1023   | 635.5  |
| 240   | 763.5  | 713    | 525   | 2852    | 682    | 206    |
| 272   | 1944   | 1207   | 981   | 5756    | 1070   | 221.5  |
| 190.5 | 548    | 682    | 418   | 1339.5  | 992    | 468.5  |
| 750   | 2351   | 1553   | 817   | 1147    | 1156   | 777.5  |
| 1011  | 1248   | 1627   | 1204  | 12702.5 | 1351   | 1020   |
| 280   | 1561.5 | 1131   | 724.5 | 1114    | 743    | 212    |
| 597.5 | 2756   | 1211.5 | 705.5 | 1465    | 897    | 910    |
| 233   | 481    | 589    | 366   | 4239.5  | 444    | 255    |
| 199   | 404.5  | 370    | 256   | 511     | 326    | 215    |
| 564.5 | 522    | 726    | 417   | 1505.5  | 494.5  | 186    |
| 185.5 | 464    | 491    | 301   | 554     | 365.5  | 272    |
| 75    | 270.5  | 323.5  | 162   | 8334    | 254.5  | 131    |
| 144   | 545.5  | 632    | 311.5 | 828     | 357    | 161    |
| 412   | 767    | 363    | 278   | 603     | 347    | 229    |
| 216.5 | 782    | 1030.5 | 521   | 912.5   | 552    | 230    |
| 125   | 435    | 366.5  | 208.5 | 673     | 359    | 195.5  |
| 1157  | 2493   | 1816   | 1041  | 2982    | 1964   | 1193.5 |
| 188   | 690.5  | 2153   | 566.5 | 3143    | 1669   | 443    |
| 32    | 93.5   | 121    | 60.5  | 193     | 104    | 50.5   |
| 122   | 510    | 927    | 341   | 1610    | 2555   | 196    |
| 186   | 298    | 409    | 180.5 | 502.5   | 288    | 146.5  |
| 167.5 | 757    | 862    | 496.5 | 721     | 658    | 187.5  |
| 377   | 1331   | 1109   | 616   | 2372.5  | 904    | 303.5  |
| 900.5 | 1259   | 1013.5 | 503.5 | 1169    | 648    | 315    |
| 113   | 322.5  | 514.75 | 257   | 521.75  | 275.75 | 133    |

| 95_Rv3326_A | 96_Rv3326_A | 97_Rv3362_A | 98_Rv3362c_ | 99_Rv3376_A | 100_Rv3376_ | 150_Rv3495c_ |
|-------------|-------------|-------------|-------------|-------------|-------------|--------------|
| 1776        | 1960        | 640         | 1212.5      | 628         | 702.5       | 579          |
| 593         | 513         | 378.5       | 817         | 275         | 378         | 1044         |
| 1123        | 1067        | 682         | 1300        | 563         | 661         | 3522         |
| 682         | 779.5       | 399.5       | 717         | 303         | 451         | 221          |
| 1020        | 627         | 598         | 957         | 306         | 678.5       | 216          |
| 1240        | 1200        | 913         | 1975        | 879         | 842         | 3436         |
| 1934        | 2016        | 1855        | 10552       | 1048        | 1647.5      | 1077         |
| 601         | 594         | 436         | 1739.5      | 329         | 426         | 1154         |
| 2035        | 1530.5      | 857         | 1305        | 817         | 923.5       | 750          |
| 1610        | 1435        | 1058        | 9582        | 1090.5      | 1016        | 1489.5       |
| 1281        | 1267        | 832.5       | 1038.5      | 693         | 808         | 550          |
| 1209        | 1151        | 580         | 698.5       | 601         | 666         | 1025.5       |
| 11098       | 1345        | 430         | 742         | 12166       | 2128        | 248          |
| 1623.5      | 1143        | 928.5       | 949.5       | 773         | 1120.5      | 1164         |
| 945         | 845         | 576         | 806.5       | 523         | 583         | 1217         |
| 538         | 508         | 407         | 900.5       | 278         | 389         | 307          |
| 422         | 442         | 197         | 742         | 180.5       | 214         | 136          |
| 965         | 1165.5      | 447.5       | 924         | 348         | 411.5       | 199          |
| 1436        | 1008        | 758.5       | 1053        | 792         | 1028        | 1141         |
| 2484.5      | 2338        | 1208        | 1533        | 736         | 1023        | 511          |
| 612.5       | 687         | 386         | 1674.5      | 271         | 352         | 191          |
| 1582.5      | 1302.5      | 899         | 1676        | 599         | 1113        | 502.5        |
| 1355        | 1023        | 605.5       | 1311.5      | 330         | 657         | 208          |
| 913.5       | 593         | 661         | 491         | 409         | 765         | 322.5        |
| 347         | 241         | 588         | 556         | 432         | 363         | 298          |
| 473         | 410         | 300         | 494.5       | 267         | 312         | 152          |
| 1035        | 830         | 619         | 687         | 601.5       | 737         | 649          |
| 1110        | 1023        | 644         | 1906        | 585         | 703         | 397.5        |
| 1387        | 1488        | 762         | 1319.5      | 667         | 835         | 443.5        |
| 1741.5      | 1434        | 1044        | 3501        | 790.5       | 879         | 412.5        |
| 1072        | 880.5       | 476         | 793         | 644         | 656         | 1397         |
| 456         | 448         | 331         | 1076        | 330         | 343.5       | 136          |
| 763         | 711         | 447         | 6878.5      | 301         | 548         | 223          |
| 408         | 350         | 283.5       | 392         | 266.5       | 287         | 172.5        |
| 469         | 397         | 354.5       | 808         | 705.5       | 386.5       | 209.5        |
| 650         | 627         | 289         | 924         | 225.5       | 311         | 150.5        |
| 2373.5      | 2212        | 1279.5      | 2255        | 1137        | 1230.5      | 1960         |
| 630         | 762         | 411         | 383.5       | 260         | 384.5       | 198          |
| 240         | 255         | 128         | 618         | 104         | 148         | 64           |
| 291         | 303.5       | 176         | 262         | 186         | 188.5       | 164          |
| 884         | 800.5       | 550.5       | 1082        | 434.5       | 593         | 290          |
| 795         | 539         | 522         | 602.5       | 409.5       | 589.5       | 536          |
| 420         | 325         | 370.5       | 298         | 180         | 390         | 208          |
| 810.5       | 659.5       | 555         | 781         | 459         | 677.5       | 431.5        |
| 1236        | 997         | 707         | 908         | 743         | 735         | 349          |
| 2291        | 1931        | 922         | 1426        | 697         | 864.5       | 489          |
| 3812        | 3793        | 1735        | 2397        | 1317        | 1489        | 914          |
| 529         | 609         | 398         | 2899        | 474         | 470         | 165          |
| 657.5       | 623         | 469         | 742.5       | 324.5       | 477         | 253.5        |

|        |        |        |        |        |        |        |
|--------|--------|--------|--------|--------|--------|--------|
| 480    | 376    | 319    | 908.5  | 197    | 284.5  | 118    |
| 487    | 374    | 249.5  | 1042   | 260    | 332    | 555.5  |
| 906.5  | 782    | 590    | 762    | 455    | 597.5  | 339.5  |
| 5069   | 4317   | 2404.5 | 2015   | 1754   | 1773   | 1801.5 |
| 983    | 715.5  | 509.5  | 1129   | 563.5  | 657    | 940    |
| 802    | 858    | 446    | 552    | 304    | 427.5  | 218    |
| 514    | 405    | 328    | 322    | 397    | 387    | 245    |
| 306.5  | 270    | 232    | 255.5  | 145    | 250    | 99     |
| 331    | 269.5  | 206    | 619.5  | 173    | 219.5  | 135    |
| 287    | 263    | 206    | 280    | 169    | 225    | 97     |
| 1002   | 799    | 789    | 791    | 561    | 673.5  | 345.5  |
| 419    | 325    | 246    | 273    | 251    | 270.5  | 183    |
| 1143   | 961    | 569.5  | 1030.5 | 693    | 788    | 1433   |
| 1326   | 1153   | 668    | 1055.5 | 462    | 581    | 551    |
| 240    | 222    | 280.5  | 349    | 176.5  | 280    | 133.5  |
| 402    | 352.5  | 294    | 709    | 212    | 349.5  | 261.5  |
| 1941   | 1547.5 | 965    | 1195   | 1271   | 1145   | 2092   |
| 712    | 538    | 368    | 746.5  | 278.5  | 366    | 273    |
| 1206   | 1157   | 598    | 1642.5 | 687.5  | 777    | 1085   |
| 1311.5 | 1232.5 | 793    | 955    | 857    | 1036   | 1518   |
| 1181   | 971    | 751    | 954    | 615    | 794    | 428    |
| 606    | 585    | 351    | 967    | 254    | 436    | 147.5  |
| 960    | 905    | 547    | 653    | 382    | 482    | 239    |
| 766    | 402    | 275.5  | 1250   | 215    | 309    | 136    |
| 562    | 523.5  | 470    | 412    | 343    | 438    | 176    |
| 552    | 621.5  | 541    | 590.5  | 463    | 455    | 340    |
| 797    | 652    | 600.5  | 737    | 533    | 690.5  | 336    |
| 264    | 271.5  | 173    | 271    | 150    | 168    | 155    |
| 3796   | 3014   | 2104   | 2000   | 1682   | 2082   | 2125   |
| 580.5  | 204    | 293    | 299.5  | 103    | 321    | 154    |
| 400.5  | 324    | 266    | 274    | 197.5  | 270.5  | 146    |
| 1213   | 976.5  | 568    | 617    | 773    | 1003.5 | 1220   |
| 507    | 421    | 433    | 517    | 286.5  | 488    | 157    |
| 213    | 202.5  | 186    | 918    | 103    | 153    | 91     |
| 394.5  | 334    | 311    | 408.5  | 212    | 302.5  | 155    |
| 414.5  | 408    | 200    | 4410   | 158    | 217    | 126    |
| 713.5  | 612    | 399    | 380    | 273.5  | 453    | 193    |
| 372    | 317.5  | 172.5  | 584    | 166    | 178    | 88     |
| 644    | 643.5  | 380    | 412    | 277    | 373    | 214    |
| 2392.5 | 2097   | 1216   | 1187   | 1171.5 | 1180   | 2117   |
| 218.5  | 224    | 124    | 175    | 92.5   | 123    | 71     |
| 4145   | 4213   | 3082   | 2017   | 2362.5 | 2666   | 1099   |
| 582    | 594    | 294    | 495    | 254    | 362    | 710.5  |
| 3162   | 2489.5 | 2202.5 | 4211.5 | 2612   | 2571.5 | 11284  |
| 2970.5 | 550    | 2565   | 488    | 805    | 3399   | 237    |
| 913    | 698    | 563    | 6123   | 483.5  | 618    | 248.5  |
| 3610   | 3818   | 2148.5 | 1478   | 1848   | 1763   | 840.5  |
| 556    | 506    | 314    | 499.5  | 283    | 364.5  | 160.5  |
| 1496.5 | 1543   | 765    | 1473   | 979    | 959    | 2307   |
| 826    | 866    | 438.5  | 969    | 575    | 479    | 236    |

|        |        |        |        |       |        |        |
|--------|--------|--------|--------|-------|--------|--------|
| 383    | 315    | 242.5  | 222.5  | 148   | 262    | 480.5  |
| 1031   | 1080   | 571    | 815.5  | 393.5 | 498    | 253    |
| 426    | 410    | 352    | 356.5  | 254   | 306    | 120    |
| 2000   | 2272   | 1155   | 2162   | 824   | 1142   | 3709   |
| 782    | 812    | 616    | 6827   | 348   | 537.5  | 426    |
| 2317   | 1888.5 | 1099   | 1657   | 1470  | 1585   | 3617   |
| 40     | 39     | 23.5   | 26     | 15    | 27     | 16     |
| 805.5  | 700.5  | 415    | 1277.5 | 383   | 430    | 230    |
| 3411   | 2617.5 | 1956   | 1512   | 1675  | 1591   | 592    |
| 356    | 373    | 217    | 475    | 193   | 235    | 145    |
| 329    | 304.5  | 242.5  | 242    | 158   | 241    | 104    |
| 561    | 227    | 290.5  | 236    | 109   | 368    | 80     |
| 892.5  | 676    | 413.5  | 4554   | 266   | 460    | 674.5  |
| 443    | 493    | 218.5  | 342    | 126   | 204    | 163    |
| 150    | 178    | 111    | 104    | 295.5 | 139    | 87     |
| 671    | 541.5  | 541    | 620.5  | 385   | 482.5  | 201    |
| 502    | 514    | 282    | 505    | 257.5 | 304    | 118    |
| 905    | 1020   | 524    | 800    | 453   | 473.5  | 349    |
| 1117   | 984    | 575    | 534    | 460   | 563    | 451    |
| 1757   | 1564   | 1023   | 1058   | 869   | 956    | 393    |
| 1238.5 | 1274   | 478    | 608    | 382   | 433    | 241    |
| 2381   | 1379   | 965.5  | 1058.5 | 400   | 1245   | 277    |
| 662    | 594.5  | 422.5  | 837    | 359   | 387.5  | 193    |
| 2209.5 | 2782   | 1109.5 | 646    | 482   | 841    | 387    |
| 2247   | 2287   | 1346   | 2048.5 | 848.5 | 1166   | 621    |
| 1121   | 588.5  | 747    | 648    | 625.5 | 753    | 284.5  |
| 1571   | 1496   | 781    | 1384.5 | 621   | 685    | 416    |
| 516    | 586    | 339    | 617    | 340.5 | 421    | 177    |
| 357    | 361.5  | 213    | 433    | 204   | 268    | 212    |
| 690.5  | 491    | 445    | 3060   | 340   | 410.5  | 242    |
| 592    | 701    | 272.5  | 598    | 199   | 325    | 189.5  |
| 277    | 319    | 228.5  | 666    | 128.5 | 175    | 154    |
| 397    | 408.5  | 362    | 2002   | 253   | 391    | 174    |
| 452.5  | 467    | 264.5  | 394    | 224   | 267    | 176.5  |
| 705    | 688    | 467    | 1380   | 506   | 604    | 1581.5 |
| 326.5  | 344.5  | 228.5  | 281.5  | 265   | 226    | 181.5  |
| 2283   | 2034.5 | 1248.5 | 3339.5 | 807.5 | 1004   | 582.5  |
| 1031   | 1605   | 560    | 646    | 836   | 531    | 249    |
| 111    | 117.5  | 62.5   | 97.5   | 46    | 61.5   | 46     |
| 859    | 1024.5 | 290.5  | 775    | 344.5 | 339.5  | 465    |
| 702.5  | 520.5  | 205.5  | 1733.5 | 326   | 224    | 156    |
| 778    | 581    | 559    | 1035   | 384   | 590    | 225    |
| 1067   | 855    | 602    | 897    | 643   | 586.5  | 486    |
| 845    | 688    | 555    | 693    | 384.5 | 557    | 299    |
| 392.25 | 447.5  | 287.5  | 343    | 202   | 290.75 | 159    |

| 151_Rv3616_ | 152_Rv3628_ | 153_Rv3762c | 154_Rv3763_ | 155_Rv3763_ | 156_Rv3775_ | 157_Rv3804c |
|-------------|-------------|-------------|-------------|-------------|-------------|-------------|
| 127         | 754         | 1700.5      | 1422        | 675.5       | 1569.5      | 20699       |
| 84          | 411         | 620         | 366         | 205         | 657         | 1078        |
| 252         | 501         | 1161        | 552         | 381         | 780.5       | 659.5       |
| 591.5       | 1241        | 699         | 403         | 359         | 520         | 243         |
| 111         | 1160        | 530         | 645.5       | 258         | 905         | 328         |
| 112         | 2885        | 1337        | 782.5       | 441         | 1178        | 380         |
| 177         | 621.5       | 1611        | 898.5       | 743.5       | 1210.5      | 464.5       |
| 84          | 432         | 747         | 270         | 203         | 671         | 1728.5      |
| 1519        | 13963       | 2697.5      | 941         | 702         | 2340.5      | 548.5       |
| 592         | 752         | 2209.5      | 820         | 708         | 1288        | 933         |
| 703.5       | 891         | 2083        | 597.5       | 459         | 820         | 1653        |
| 21321       | 3340.5      | 1073        | 612         | 426         | 904         | 9169        |
| 112         | 343         | 1049        | 375         | 324         | 717.5       | 163         |
| 20906       | 3448        | 2198        | 863         | 721         | 1537        | 5072.5      |
| 88          | 605         | 1826        | 1143.5      | 798         | 830.5       | 13215       |
| 113         | 230.5       | 437.5       | 287         | 216         | 6139        | 366         |
| 84          | 184         | 314         | 203.5       | 143         | 460.5       | 639         |
| 53          | 328.5       | 508         | 297         | 288.5       | 563         | 30126       |
| 17737       | 3707        | 1102        | 729         | 544         | 1061        | 16410.5     |
| 134.5       | 9372        | 1490        | 818         | 2022        | 2254        | 31717       |
| 48          | 4808        | 594         | 464         | 406         | 422         | 7926        |
| 105         | 2843        | 2425        | 756.5       | 638         | 3843        | 21506       |
| 120         | 6868        | 669.5       | 344.5       | 433         | 555.5       | 7716        |
| 75          | 765         | 622         | 350         | 440         | 757         | 21102.5     |
| 55          | 321         | 531.5       | 235.5       | 155         | 354         | 127.5       |
| 244         | 1408        | 758         | 465         | 627.5       | 1080        | 186         |
| 9652        | 2198        | 947         | 502         | 532.5       | 858         | 357         |
| 435.5       | 8016        | 932         | 502.5       | 502.5       | 1048        | 31394       |
| 268         | 1221.5      | 1384.5      | 537         | 694.5       | 1125        | 28478.5     |
| 84          | 497         | 1175        | 809         | 1001        | 913         | 14846.5     |
| 33008       | 5264        | 627         | 457.5       | 354         | 797         | 460         |
| 70          | 1719        | 501         | 233         | 368         | 337         | 422         |
| 79          | 299         | 954         | 357         | 269.5       | 564.5       | 156.5       |
| 80          | 173         | 564         | 225.5       | 382.5       | 602         | 5385        |
| 68          | 219         | 6226        | 299.5       | 298         | 322         | 108         |
| 67          | 1015        | 683         | 244.5       | 236         | 387         | 29135       |
| 41744       | 6029        | 1592        | 1332.5      | 1554        | 2428        | 7574        |
| 102         | 2667        | 2643        | 397.5       | 287         | 1348.5      | 125         |
| 64.5        | 136         | 464         | 132         | 172         | 198         | 50          |
| 49          | 190         | 526         | 190         | 169         | 277         | 2967        |
| 286.5       | 962         | 680.5       | 506.5       | 631         | 702.5       | 535         |
| 70          | 2500.5      | 3666        | 334         | 310         | 561         | 337.5       |
| 81          | 500         | 572.5       | 250         | 333         | 456         | 83          |
| 2950        | 918.5       | 988         | 474         | 269         | 581         | 1039        |
| 220         | 742.5       | 1101        | 525         | 397.5       | 930.5       | 424         |
| 495         | 997.5       | 2651.5      | 709         | 1005        | 1940        | 12549       |
| 240.5       | 1762        | 2000        | 972.5       | 3074        | 3025        | 2958.5      |
| 70          | 245         | 495.5       | 286         | 192         | 649         | 106.5       |
| 103         | 1264        | 659         | 443.5       | 349         | 532         | 7659        |

|         |         |        |        |        |        |         |
|---------|---------|--------|--------|--------|--------|---------|
| 93      | 229     | 762    | 340.5  | 298    | 379    | 229     |
| 3189    | 639     | 437.5  | 254.5  | 341    | 367    | 4828    |
| 409     | 8299    | 1147.5 | 532    | 897    | 1300   | 3434    |
| 23096   | 5139    | 2327   | 1576   | 5521.5 | 5240.5 | 4920    |
| 7480    | 2082    | 3982   | 517    | 581.5  | 743    | 34713   |
| 73      | 571     | 718    | 1504   | 1126.5 | 677    | 20917.5 |
| 438     | 265.5   | 1112   | 236.5  | 304.5  | 376    | 169     |
| 63.5    | 784     | 390    | 162.5  | 169    | 438    | 308.5   |
| 62      | 262     | 411    | 196    | 186    | 283    | 145.5   |
| 61      | 135.5   | 416.5  | 182.5  | 657    | 206    | 73      |
| 112     | 494.5   | 1142   | 628    | 1742   | 868    | 33618.5 |
| 59.5    | 385     | 765.5  | 247    | 185    | 363    | 454.5   |
| 82      | 620     | 4311.5 | 1294   | 730    | 795.5  | 26070   |
| 284     | 592     | 1256   | 482    | 743    | 946    | 37214.5 |
| 40      | 1456.5  | 1020   | 259    | 127    | 447.5  | 91      |
| 70      | 340     | 525.5  | 364    | 387    | 328.5  | 4536    |
| 48520   | 8205    | 1448.5 | 831    | 1204   | 1370   | 666     |
| 90      | 680     | 758.5  | 397.5  | 430    | 472    | 211     |
| 18348   | 3535    | 1484   | 603    | 474.5  | 816    | 459.5   |
| 33330   | 5495    | 1283   | 753    | 603.5  | 1011   | 27914   |
| 850     | 4731    | 1479.5 | 1288   | 861    | 1493   | 11797   |
| 96      | 267.5   | 765    | 350    | 435    | 641    | 242     |
| 108     | 1129    | 733    | 362    | 353.5  | 770.5  | 12309   |
| 224.5   | 250     | 530    | 198    | 179    | 398    | 82      |
| 104.5   | 234     | 767    | 366.5  | 387    | 996.5  | 338     |
| 58      | 426     | 1811   | 343.5  | 317.5  | 576    | 19339   |
| 2906    | 889     | 798.5  | 3135   | 2409   | 616    | 6557    |
| 76      | 130     | 281    | 164    | 300    | 238    | 394     |
| 37272   | 6961.5  | 3274.5 | 1785   | 2766   | 3905.5 | 33077   |
| 71      | 306     | 363    | 447.5  | 451    | 435    | 67      |
| 60      | 242     | 427    | 209.5  | 195    | 350    | 1869    |
| 24536.5 | 7208    | 839    | 552    | 739    | 1050   | 43127   |
| 146     | 5401    | 523    | 347    | 382    | 440.5  | 17610   |
| 41.5    | 73      | 296    | 170    | 720    | 202    | 118     |
| 103     | 245     | 483.5  | 656    | 878    | 703    | 157.5   |
| 63.5    | 189     | 514.5  | 245    | 213    | 327    | 168.5   |
| 81      | 531     | 638    | 425    | 256.5  | 535    | 314     |
| 67      | 1184    | 406.5  | 835.5  | 815    | 396    | 2379    |
| 96      | 1124    | 742.5  | 360.5  | 300.5  | 627    | 4497.5  |
| 50318   | 8119    | 1494.5 | 993    | 3937.5 | 2299.5 | 23419   |
| 44      | 3218    | 627.5  | 135    | 106    | 174    | 110     |
| 6256    | 18820.5 | 2305   | 1795   | 1803   | 2145   | 39784   |
| 74      | 701.5   | 463    | 247    | 217    | 369    | 198     |
| 158     | 1364.5  | 1446   | 1670   | 820    | 2017   | 590     |
| 75      | 790     | 594    | 528    | 299    | 576.5  | 769.5   |
| 123     | 654     | 941    | 411    | 616    | 759    | 10390.5 |
| 925     | 1356    | 2445.5 | 1231.5 | 2567   | 2688   | 36027   |
| 72      | 7942.5  | 602    | 289    | 430.5  | 582    | 2822.5  |
| 28559   | 5403    | 1101   | 648    | 478    | 924    | 22382   |
| 81      | 455     | 567    | 343    | 335    | 555    | 2528.5  |



|       |         |        |        |        |        |        |
|-------|---------|--------|--------|--------|--------|--------|
| 75    | 192.5   | 378    | 217    | 177    | 271    | 103    |
| 154   | 590     | 1158   | 440    | 726    | 1118   | 230    |
| 116   | 267     | 484    | 250    | 609    | 496    | 25977  |
| 126   | 8774    | 1083.5 | 835    | 605    | 1177   | 26392  |
| 565.5 | 522     | 829    | 386.5  | 692    | 654    | 287    |
| 46768 | 7942    | 4967   | 6508   | 4849   | 2165   | 31071  |
| 20    | 21      | 63.5   | 33     | 31     | 51     | 12     |
| 145   | 4045    | 665.5  | 370.5  | 514.5  | 731    | 6261.5 |
| 312   | 1057    | 2062   | 966    | 1506   | 3165   | 13228  |
| 61    | 10782   | 545    | 431    | 281    | 286.5  | 1141   |
| 70    | 746     | 408    | 207    | 187    | 290    | 92     |
| 81.5  | 352.5   | 299    | 377    | 184    | 683    | 104    |
| 85    | 1186    | 579    | 379    | 340    | 534    | 12508  |
| 644   | 582     | 420    | 240    | 152.5  | 387    | 92     |
| 58    | 83      | 159    | 100    | 218    | 126    | 39     |
| 102.5 | 652     | 593    | 317    | 345    | 680    | 1021.5 |
| 55    | 287     | 408    | 220    | 280    | 323    | 98     |
| 99    | 428     | 722    | 405    | 640    | 1268.5 | 5859   |
| 7426  | 1408    | 1130   | 531    | 835.5  | 1197   | 571.5  |
| 98    | 1946.5  | 1177   | 661.5  | 635    | 1003   | 2379   |
| 102.5 | 420     | 904    | 370    | 499    | 639    | 4048   |
| 428   | 4293.5  | 1138   | 1101.5 | 765.5  | 1842   | 1023   |
| 84    | 340.5   | 558    | 309.5  | 393    | 512    | 8252.5 |
| 188   | 12539   | 1073   | 837    | 1826.5 | 1180   | 26116  |
| 171.5 | 11093.5 | 1546   | 909    | 1220.5 | 2228   | 27522  |
| 125   | 969     | 1048.5 | 545    | 587    | 877.5  | 454.5  |
| 2285  | 3205.5  | 1296.5 | 538    | 743    | 985.5  | 2411   |
| 90.5  | 3239.5  | 516    | 268    | 312.5  | 479    | 36281  |
| 919   | 844     | 945    | 238    | 234    | 409.5  | 19270  |
| 95    | 422     | 664    | 335    | 318.5  | 555    | 189    |
| 64    | 862     | 488    | 243    | 329    | 427    | 12599  |
| 90    | 184     | 597    | 137    | 151    | 481    | 71     |
| 73    | 246     | 503.5  | 294    | 682.5  | 341.5  | 281.5  |
| 81    | 3001    | 620    | 767    | 599    | 401.5  | 14323  |
| 71    | 472     | 1422.5 | 661    | 375    | 523    | 223    |
| 93    | 201     | 446.5  | 179.5  | 213    | 305    | 91     |
| 219   | 891.5   | 2339   | 898.5  | 1671   | 2968.5 | 2635   |
| 153.5 | 283     | 4861   | 517    | 325    | 1337   | 1817   |
| 31    | 376     | 290    | 68     | 76     | 124    | 35     |
| 97.5  | 380     | 606    | 647.5  | 327.5  | 1134   | 136.5  |
| 75    | 445     | 377.5  | 194.5  | 275.5  | 333.5  | 1408   |
| 224.5 | 285     | 2358.5 | 532    | 500.5  | 714.5  | 1590   |
| 166   | 842.5   | 1402.5 | 509    | 745    | 1024   | 498.5  |
| 206   | 744     | 1052   | 443    | 1139   | 649    | 513    |
| 85.25 | 280     | 350    | 239    | 133    | 280    | 81.5   |

158\_Rv3864\_159\_Rv3874\_160\_Rv3878\_161\_Rv3881c\_ADI 1

|       |         |         |         |
|-------|---------|---------|---------|
| 112   | 187     | 126     | 722     |
| 79    | 83      | 2367    | 175     |
| 151   | 347     | 3032.5  | 962.5   |
| 94    | 418.5   | 1976.5  | 1874    |
| 105   | 154     | 1553    | 114     |
| 170   | 190     | 338     | 1217    |
| 202   | 3268    | 3632    | 527     |
| 89    | 139     | 345     | 420     |
| 653   | 612     | 100     | 2942    |
| 262   | 333     | 8419    | 1072    |
| 2004  | 15944   | 635.5   | 274     |
| 148   | 2169    | 66      | 28847.5 |
| 71.5  | 125     | 29      | 165     |
| 205   | 31175.5 | 111     | 41893.5 |
| 97    | 250     | 76      | 352     |
| 205   | 347     | 56      | 9715    |
| 58    | 118     | 37      | 4578.5  |
| 98    | 432     | 29      | 16435.5 |
| 177.5 | 1245    | 76      | 12727   |
| 1492  | 2897    | 2062    | 18705.5 |
| 52.5  | 131     | 66      | 6664.5  |
| 153   | 320     | 98.5    | 8024    |
| 180   | 140     | 81      | 816     |
| 172   | 304     | 6344    | 3891    |
| 80    | 234     | 417     | 400.5   |
| 262.5 | 828.5   | 35116.5 | 142     |
| 157   | 20169   | 99      | 27418   |
| 262   | 13686   | 485     | 34898   |
| 224   | 522.5   | 93      | 23649   |
| 147   | 632     | 57      | 13136   |
| 96    | 484     | 32.5    | 10908   |
| 54    | 69      | 40      | 967     |
| 97    | 348.5   | 461     | 87      |
| 67    | 54386.5 | 737     | 300     |
| 59    | 103     | 23      | 84      |
| 53    | 226     | 117     | 48.5    |
| 315   | 52738   | 366     | 1325.5  |
| 201   | 137     | 31.5    | 345     |
| 128   | 114     | 12      | 116     |
| 50    | 288.5   | 192     | 51      |
| 140.5 | 647.5   | 54      | 173     |
| 107   | 4522.5  | 438     | 14397   |
| 110   | 271     | 137     | 125     |
| 220.5 | 215.5   | 44      | 1406.5  |
| 925   | 266     | 4611    | 126     |
| 196   | 32477.5 | 99      | 28098   |
| 1752  | 6744.5  | 198     | 17036   |
| 94    | 504.5   | 29      | 153     |
| 99    | 192     | 30      | 8126    |

|        |       |       |         |
|--------|-------|-------|---------|
| 72     | 1427  | 148   | 2083    |
| 53     | 126   | 35    | 127     |
| 661    | 394   | 135   | 22036   |
| 3950   | 7806  | 625   | 41006   |
| 124    | 422   | 44    | 13728   |
| 95     | 217   | 34    | 337.5   |
| 218    | 161   | 29    | 14008   |
| 55     | 114   | 45    | 369     |
| 74.5   | 254   | 144   | 2628    |
| 56.5   | 55    | 128   | 212     |
| 222    | 637   | 138.5 | 16971   |
| 67     | 3576  | 29    | 241     |
| 154    | 377   | 367   | 18233   |
| 224    | 431   | 358   | 24802   |
| 70     | 57    | 28    | 45.5    |
| 70     | 142   | 31    | 109     |
| 178    | 8340  | 99    | 27591   |
| 120    | 183.5 | 41    | 253     |
| 211    | 455   | 869   | 29919   |
| 152    | 1485  | 67    | 146     |
| 1598.5 | 12237 | 7712  | 576     |
| 88     | 37871 | 94    | 288.5   |
| 274    | 597   | 53    | 28352   |
| 199.5  | 81    | 46    | 70.5    |
| 95     | 108   | 47.5  | 99      |
| 97     | 3365  | 40    | 12706.5 |
| 145    | 393   | 20515 | 1041    |
| 83     | 63    | 2717  | 41      |
| 838    | 2233  | 319   | 48647.5 |
| 49     | 54    | 293   | 82      |
| 67     | 72    | 31    | 441.5   |
| 127    | 2714  | 65    | 131     |
| 200    | 183   | 36    | 17864   |
| 29     | 38    | 12    | 33      |
| 90.5   | 107   | 38    | 2916.5  |
| 62     | 94    | 54    | 446     |
| 123    | 257   | 76    | 363     |
| 38     | 88.5  | 16    | 120     |
| 130    | 145   | 62    | 143.5   |
| 618    | 41444 | 2620  | 4775.5  |
| 35     | 62    | 17    | 44      |
| 329    | 3645  | 166   | 294     |
| 87     | 266   | 35    | 779     |
| 220    | 611   | 599   | 73      |
| 121    | 172   | 51.5  | 14819   |
| 163    | 365.5 | 55    | 33918.5 |
| 689    | 2123  | 231   | 37087   |
| 110.5  | 659.5 | 42    | 27775   |
| 122    | 437.5 | 103   | 1233    |
| 98     | 269   | 40    | 69.5    |

|        |         |       |         |
|--------|---------|-------|---------|
| 69     | 112     | 25    | 85      |
| 116    | 246     | 35    | 351     |
| 82     | 491     | 31    | 83      |
| 177.5  | 336     | 81    | 161     |
| 1098.5 | 1900.5  | 63    | 383.5   |
| 230    | 51297.5 | 109   | 410     |
| 10     | 13      | 7     | 12      |
| 152    | 477.5   | 76    | 25424   |
| 452    | 6124    | 900   | 12594.5 |
| 72     | 113.5   | 29    | 45      |
| 60     | 79      | 3249  | 88      |
| 51     | 58      | 203   | 113     |
| 71.5   | 1170    | 142   | 15604   |
| 40     | 70.5    | 18    | 64      |
| 34     | 32      | 14    | 62.5    |
| 142    | 975.5   | 348   | 666     |
| 59.5   | 62      | 20.5  | 93      |
| 166    | 47114   | 96    | 7364.5  |
| 5721   | 662.5   | 42    | 1333.5  |
| 133    | 410.5   | 89    | 7686    |
| 363    | 1264    | 43    | 84      |
| 1147   | 313     | 193.5 | 1749    |
| 128    | 585     | 712   | 4442    |
| 179    | 584     | 836   | 24687   |
| 312    | 48612   | 302   | 11393   |
| 268    | 431     | 158   | 118     |
| 100.5  | 15230   | 1139  | 228     |
| 78     | 1715    | 122   | 316     |
| 81     | 817.5   | 41    | 90      |
| 131    | 148     | 568   | 3737    |
| 75     | 132.5   | 37    | 182     |
| 95     | 4521    | 47    | 165     |
| 81     | 95      | 56    | 634     |
| 131    | 181     | 174.5 | 173     |
| 94.5   | 128     | 114   | 60.5    |
| 93     | 107     | 18    | 121     |
| 750    | 4297    | 361   | 7988.5  |
| 371    | 142     | 33    | 86      |
| 16     | 37      | 18    | 25      |
| 176    | 689     | 25    | 57      |
| 78     | 85      | 36    | 48      |
| 83     | 114     | 39    | 233     |
| 350    | 204     | 55    | 143.5   |
| 141    | 461.5   | 53    | 216     |
| 83.75  | 58      | 10.75 | 81      |

Supplement C) Optimization Results

Pool 1 parts (97.18%) 1:200.0 dilution

| parts        | factor | sample | 42_Rv0212_ADI 2 ls | 43_Rv0212_A | 44_Rv0272c_1 |
|--------------|--------|--------|--------------------|-------------|--------------|
| 1            | 1      | 1      | 265                | 1885.5      | 2891 1307    |
| weighted sum |        |        |                    | 1885.5      | 2891 1307    |
| threshold    |        |        | mean neg           | 255.5       | 350 112.75   |

Pool 2 parts (98.59%) 1:400.0 dilution

| parts        | factor | sample | 42_Rv0212_ADI 2 ls | 43_Rv0212_A | 44_Rv0272c_1    |
|--------------|--------|--------|--------------------|-------------|-----------------|
| 1            | 0.5    | 100480 |                    | 1049        | 1354.5 733.5    |
| 1            | 0.5    | 252    |                    | 2383.5      | 3728 1565       |
| weighted sum |        |        |                    | 1716.25     | 2541.25 1149.25 |
| threshold    |        |        | mean neg           | 255.5       | 350 112.75      |

Pool 3 parts (100%) 1:600.0 dilution

| parts        | factor | sample | 42_Rv0212_ADI 2 ls | 43_Rv0212_A | 44_Rv0272c_1   |
|--------------|--------|--------|--------------------|-------------|----------------|
| 1            | 0.33   | 129    |                    | 2348.5      | 4146.5 1545    |
| 1            | 0.33   | 258    |                    | 2448        | 3275 2085      |
| 1            | 0.33   | 265    |                    | 1885.5      | 2891 1307      |
| weighted sum |        |        |                    | 2227.33     | 3437.5 1645.67 |
| threshold    |        |        | mean neg           | 255.5       | 350 112.75     |
|              |        |        |                    | 1           | 1 1            |

Pool 4 parts (100%) 1:800.0 dilution

| parts        | factor | sample | 42_Rv0212_ADI 2 ls | 43_Rv0212_A | 44_Rv0272c_1    |
|--------------|--------|--------|--------------------|-------------|-----------------|
| 0            | 0.25   | 29     |                    | 601.5       | 941 375         |
| 1            | 0.25   | 128    |                    | 760         | 1451.5 456      |
| 2            | 0.25   | 252    |                    | 2383.5      | 3728 1565       |
| 1            | 0.25   | 258    |                    | 2448        | 3275 2085       |
| weighted sum |        |        |                    | 1993.75     | 3045.63 1417.75 |
| threshold    |        |        | mean neg           | 255.5       | 350 112.75      |

Pool 5 parts (100%) 1:1000.0 dilution

| parts        | factor | sample | 42_Rv0212_ADI 2 ls | 43_Rv0212_A | 44_Rv0272c_1 |
|--------------|--------|--------|--------------------|-------------|--------------|
| 3            | 0.2    | 252    |                    | 2383.5      | 3728 1565    |
| 1            | 0.2    | 258    |                    | 2448        | 3275 2085    |
| 1            | 0.2    | 265    |                    | 1885.5      | 2891 1307    |
| weighted sum |        |        |                    | 2296.8      | 3470 1617.4  |
| threshold    |        |        | mean neg           | 255.5       | 350 112.75   |

Pool 6 parts (100%) 1:1200.0 dilution

| parts        | factor | sample | 42_Rv0212_ADI 2 ls | 43_Rv0212_A | 44_Rv0272c_1    |
|--------------|--------|--------|--------------------|-------------|-----------------|
| 3            | 0.17   | 20     |                    | 793.5       | 1100 558.5      |
| 1            | 0.17   | 129    |                    | 2348.5      | 4146.5 1545     |
| 1            | 0.17   | 205    |                    | 2207        | 3716 1271       |
| 1            | 0.17   | 258    |                    | 2448        | 3275 2085       |
| weighted sum |        |        |                    | 1564        | 2406.25 1096.08 |
| threshold    |        |        | mean neg           | 255.5       | 350 112.75      |

Pool 7 parts (100%) 1:1400.0 dilution

| parts                                 | factor | sample | 42_Rv0212_ADI 2 ls | 43_Rv0212_A | 44_Rv0272c_ |         |
|---------------------------------------|--------|--------|--------------------|-------------|-------------|---------|
| 3                                     | 0.14   | 100455 |                    | 947         | 1368.5      | 625     |
| 3                                     | 0.14   | 129    |                    | 2348.5      | 4146.5      | 1545    |
| 1                                     | 0.14   | 265    |                    | 1885.5      | 2891        | 1307    |
| weighted sum                          |        |        |                    | 1681.71     | 2776.57     | 1116.71 |
| threshold                             |        |        | mean neg           | 255.5       | 350         | 112.75  |
| Pool 8 parts (100%) 1:1600.0 dilution |        |        |                    |             |             |         |

| parts                                 | factor | sample | 42_Rv0212_ADI 2 ls | 43_Rv0212_A | 44_Rv0272c_ |        |
|---------------------------------------|--------|--------|--------------------|-------------|-------------|--------|
| 5                                     | 0.12   | 113    |                    | 2064        | 3058.5      | 926    |
| 1                                     | 0.12   | 129    |                    | 2348.5      | 4146.5      | 1545   |
| 1                                     | 0.12   | 265    |                    | 1885.5      | 2891        | 1307   |
| 1                                     | 0.12   | 268    |                    | 367         | 825         | 228.5  |
| weighted sum                          |        |        |                    | 1865.12     | 2894.38     | 963.81 |
| threshold                             |        |        | mean neg           | 255.5       | 350         | 112.75 |
| Pool 9 parts (100%) 1:1800.0 dilution |        |        |                    |             |             |        |

| parts                                  | factor | sample | 42_Rv0212_ADI 2 ls | 43_Rv0212_A | 44_Rv0272c_ |         |
|----------------------------------------|--------|--------|--------------------|-------------|-------------|---------|
| 5                                      | 0.11   | 252    |                    | 2383.5      | 3728        | 1565    |
| 1                                      | 0.11   | 265    |                    | 1885.5      | 2891        | 1307    |
| 3                                      | 0.11   | 284    |                    | 541         | 613         | 243     |
| weighted sum                           |        |        |                    | 1714        | 2596.67     | 1095.67 |
| threshold                              |        |        | mean neg           | 255.5       | 350         | 112.75  |
| Pool 10 parts (100%) 1:2000.0 dilution |        |        |                    |             |             |         |

| parts        | factor | sample | 42_Rv0212_ADI 2 ls | 43_Rv0212_A | 44_Rv0272c_ |         |
|--------------|--------|--------|--------------------|-------------|-------------|---------|
| 3            | 0.1    | 100364 |                    | 3899.5      | 4902.5      | 2559.5  |
| 1            | 0.1    | 129    |                    | 2348.5      | 4146.5      | 1545    |
| 1            | 0.1    | 205    |                    | 2207        | 3716        | 1271    |
| 5            | 0.1    | 258    |                    | 2448        | 3275        | 2085    |
| weighted sum |        |        |                    | 2849.4      | 3894.5      | 2091.95 |
| threshold    |        |        | mean neg           | 255.5       | 350         | 112.75  |
|              |        |        |                    | 1           | 1           | 1       |

|             |             |             |             |             |             |             |
|-------------|-------------|-------------|-------------|-------------|-------------|-------------|
| 45_Rv0272_A | 46_Rv0302_A | 47_Rv0379_A | 48_Rv0394_A | 49_Rv0440_A | 50_Rv0456c_ | 51_Rv0583c_ |
| 1532        | 913         | 1354        | 1516        | 952         | 955         | 21575       |
| 1532        | 913         | 1354        | 1516        | 952         | 955         | 21575       |
| 231.75      | 57          | 103.5       | 136.75      | 71          | 130         | 307         |

|             |             |             |             |             |             |             |
|-------------|-------------|-------------|-------------|-------------|-------------|-------------|
| 45_Rv0272_A | 46_Rv0302_A | 47_Rv0379_A | 48_Rv0394_A | 49_Rv0440_A | 50_Rv0456c_ | 51_Rv0583c_ |
| 2157        | 296         | 594         | 990.5       | 1928        | 1425        | 3431        |
| 2569        | 528         | 1758        | 1974        | 3188        | 2983        | 893         |
| 2363        | 412         | 1176        | 1482.25     | 2558        | 2204        | 2162        |
| 231.75      | 57          | 103.5       | 136.75      | 71          | 130         | 307         |

|             |             |             |             |             |             |             |
|-------------|-------------|-------------|-------------|-------------|-------------|-------------|
| 45_Rv0272_A | 46_Rv0302_A | 47_Rv0379_A | 48_Rv0394_A | 49_Rv0440_A | 50_Rv0456c_ | 51_Rv0583c_ |
| 2863        | 280         | 1431        | 1816        | 761         | 844         | 962         |
| 12283       | 117         | 759.5       | 1234        | 1077        | 550.5       | 363.5       |
| 1532        | 913         | 1354        | 1516        | 952         | 955         | 21575       |
| 5559.33     | 436.67      | 1181.5      | 1522        | 930         | 783.17      | 7633.5      |
| 231.75      | 57          | 103.5       | 136.75      | 71          | 130         | 307         |
| 1           | 1           | 1           | 1           | 1           | 1           | 1           |

|             |             |             |             |             |             |             |
|-------------|-------------|-------------|-------------|-------------|-------------|-------------|
| 45_Rv0272_A | 46_Rv0302_A | 47_Rv0379_A | 48_Rv0394_A | 49_Rv0440_A | 50_Rv0456c_ | 51_Rv0583c_ |
| 1202        | 192         | 364         | 287         | 1382        | 518.5       | 9534.5      |
| 644         | 412         | 330.5       | 298         | 265         | 581.5       | 3015.5      |
| 2569        | 528         | 1758        | 1974        | 3188        | 2983        | 893         |
| 12283       | 117         | 759.5       | 1234        | 1077        | 550.5       | 363.5       |
| 4516.25     | 396.25      | 1151.5      | 1370        | 1929.5      | 1774.5      | 1291.25     |
| 231.75      | 57          | 103.5       | 136.75      | 71          | 130         | 307         |

|             |             |             |             |             |             |             |
|-------------|-------------|-------------|-------------|-------------|-------------|-------------|
| 45_Rv0272_A | 46_Rv0302_A | 47_Rv0379_A | 48_Rv0394_A | 49_Rv0440_A | 50_Rv0456c_ | 51_Rv0583c_ |
| 2569        | 528         | 1758        | 1974        | 3188        | 2983        | 893         |
| 12283       | 117         | 759.5       | 1234        | 1077        | 550.5       | 363.5       |
| 1532        | 913         | 1354        | 1516        | 952         | 955         | 21575       |
| 4304.4      | 522.8       | 1477.5      | 1734.4      | 2318.6      | 2090.9      | 4923.5      |
| 231.75      | 57          | 103.5       | 136.75      | 71          | 130         | 307         |

|             |             |             |             |             |             |             |
|-------------|-------------|-------------|-------------|-------------|-------------|-------------|
| 45_Rv0272_A | 46_Rv0302_A | 47_Rv0379_A | 48_Rv0394_A | 49_Rv0440_A | 50_Rv0456c_ | 51_Rv0583c_ |
| 671.5       | 121         | 549         | 361         | 764         | 897         | 2032        |
| 2863        | 280         | 1431        | 1816        | 761         | 844         | 962         |
| 1772.5      | 23637.5     | 2206        | 1225        | 8272        | 743         | 18566.5     |
| 12283       | 117         | 759.5       | 1234        | 1077        | 550.5       | 363.5       |
| 3155.5      | 4066.25     | 1007.25     | 893         | 2067        | 804.75      | 4331.33     |
| 231.75      | 57          | 103.5       | 136.75      | 71          | 130         | 307         |

|             |             |             |             |             |             |             |
|-------------|-------------|-------------|-------------|-------------|-------------|-------------|
| 45_Rv0272_A | 46_Rv0302_A | 47_Rv0379_A | 48_Rv0394_A | 49_Rv0440_A | 50_Rv0456c_ | 51_Rv0583c_ |
| 4547        | 209.5       | 388         | 607         | 9622        | 4469        | 3068        |
| 2863        | 280         | 1431        | 1816        | 761         | 844         | 962         |
| 1532        | 913         | 1354        | 1516        | 952         | 955         | 21575       |
| 3394.57     | 340.21      | 973         | 1255        | 4585.86     | 2413.43     | 4809.29     |
| 231.75      | 57          | 103.5       | 136.75      | 71          | 130         | 307         |

|             |             |             |             |             |             |             |
|-------------|-------------|-------------|-------------|-------------|-------------|-------------|
| 45_Rv0272_A | 46_Rv0302_A | 47_Rv0379_A | 48_Rv0394_A | 49_Rv0440_A | 50_Rv0456c_ | 51_Rv0583c_ |
| 1197        | 230         | 742.5       | 1917        | 526.5       | 1054        | 1045        |
| 2863        | 280         | 1431        | 1816        | 761         | 844         | 962         |
| 1532        | 913         | 1354        | 1516        | 952         | 955         | 21575       |
| 341.5       | 89          | 180         | 178         | 448.5       | 244         | 260         |
| 1340.19     | 304         | 834.69      | 1636.88     | 599.25      | 914.12      | 3502.75     |
| 231.75      | 57          | 103.5       | 136.75      | 71          | 130         | 307         |

|             |             |             |             |             |             |             |
|-------------|-------------|-------------|-------------|-------------|-------------|-------------|
| 45_Rv0272_A | 46_Rv0302_A | 47_Rv0379_A | 48_Rv0394_A | 49_Rv0440_A | 50_Rv0456c_ | 51_Rv0583c_ |
| 2569        | 528         | 1758        | 1974        | 3188        | 2983        | 893         |
| 1532        | 913         | 1354        | 1516        | 952         | 955         | 21575       |
| 502         | 1168        | 305         | 300         | 467         | 838         | 762         |
| 1764.78     | 784.11      | 1228.78     | 1365.11     | 2032.56     | 2042.67     | 3147.33     |
| 231.75      | 57          | 103.5       | 136.75      | 71          | 130         | 307         |

|             |             |             |             |             |             |             |
|-------------|-------------|-------------|-------------|-------------|-------------|-------------|
| 45_Rv0272_A | 46_Rv0302_A | 47_Rv0379_A | 48_Rv0394_A | 49_Rv0440_A | 50_Rv0456c_ | 51_Rv0583c_ |
| 33077       | 534         | 1754        | 593         | 445         | 3350        | 2685        |
| 2863        | 280         | 1431        | 1816        | 761         | 844         | 962         |
| 1772.5      | 23637.5     | 2206        | 1225        | 8272        | 743         | 18566.5     |
| 12283       | 117         | 759.5       | 1234        | 1077        | 550.5       | 363.5       |
| 16528.15    | 2610.45     | 1269.65     | 1099        | 1575.3      | 1438.95     | 2940.1      |
| 231.75      | 57          | 103.5       | 136.75      | 71          | 130         | 307         |
| 1           | 1           | 1           | 1           | 1           | 1           | 1           |



|             |             |             |             |             |             |             |
|-------------|-------------|-------------|-------------|-------------|-------------|-------------|
| 52_Rv0632c_ | 53_Rv0798c_ | 54_Rv0801_A | 55_Rv0934_A | 56_Rv0944_A | 57_Rv0984_A | 58_Rv1030_A |
| 1247        | 1292        | 2163        | 16365       | 3811.5      | 1616        | 2063.5      |
| 1247        | 1292        | 2163        | 16365       | 3811.5      | 1616        | 2063.5      |
| 358.25      | 255         | 221.5       | 114.5       | 572.5       | 269.5       | 164         |

|             |             |             |             |             |             |             |
|-------------|-------------|-------------|-------------|-------------|-------------|-------------|
| 52_Rv0632c_ | 53_Rv0798c_ | 54_Rv0801_A | 55_Rv0934_A | 56_Rv0944_A | 57_Rv0984_A | 58_Rv1030_A |
| 792.5       | 1241        | 2365        | 904.5       | 3095.5      | 1523        | 2037        |
| 30219       | 2433        | 2271        | 1478        | 12805       | 5424        | 2738.5      |
| 15505.75    | 1837        | 2318        | 1191.25     | 7950.25     | 3473.5      | 2387.75     |
| 358.25      | 255         | 221.5       | 114.5       | 572.5       | 269.5       | 164         |

|             |             |             |             |             |             |             |
|-------------|-------------|-------------|-------------|-------------|-------------|-------------|
| 52_Rv0632c_ | 53_Rv0798c_ | 54_Rv0801_A | 55_Rv0934_A | 56_Rv0944_A | 57_Rv0984_A | 58_Rv1030_A |
| 23926       | 2158        | 1140.5      | 768         | 3120.5      | 1375        | 1807        |
| 1044        | 2517.5      | 1145.5      | 1176        | 2043        | 2812        | 7748        |
| 1247        | 1292        | 2163        | 16365       | 3811.5      | 1616        | 2063.5      |
| 8739        | 1989.17     | 1483        | 6103        | 2991.67     | 1934.33     | 3872.83     |
| 358.25      | 255         | 221.5       | 114.5       | 572.5       | 269.5       | 164         |
| 1           | 1           | 1           | 1           | 1           | 1           | 1           |

|             |             |             |             |             |             |             |
|-------------|-------------|-------------|-------------|-------------|-------------|-------------|
| 52_Rv0632c_ | 53_Rv0798c_ | 54_Rv0801_A | 55_Rv0934_A | 56_Rv0944_A | 57_Rv0984_A | 58_Rv1030_A |
| 929         | 947.5       | 971         | 290.5       | 3335        | 579         | 824         |
| 517         | 1264        | 838         | 22566       | 1527        | 789.5       | 635         |
| 30219       | 2433        | 2271        | 1478        | 12805       | 5424        | 2738.5      |
| 1044        | 2517.5      | 1145.5      | 1176        | 2043        | 2812        | 7748        |
| 15499.75    | 2161.88     | 1631.38     | 6674.5      | 7295        | 3612.38     | 3465        |
| 358.25      | 255         | 221.5       | 114.5       | 572.5       | 269.5       | 164         |

|             |             |             |             |             |             |             |
|-------------|-------------|-------------|-------------|-------------|-------------|-------------|
| 52_Rv0632c_ | 53_Rv0798c_ | 54_Rv0801_A | 55_Rv0934_A | 56_Rv0944_A | 57_Rv0984_A | 58_Rv1030_A |
| 30219       | 2433        | 2271        | 1478        | 12805       | 5424        | 2738.5      |
| 1044        | 2517.5      | 1145.5      | 1176        | 2043        | 2812        | 7748        |
| 1247        | 1292        | 2163        | 16365       | 3811.5      | 1616        | 2063.5      |
| 18589.6     | 2221.7      | 2024.3      | 4395        | 8853.9      | 4140        | 3605.4      |
| 358.25      | 255         | 221.5       | 114.5       | 572.5       | 269.5       | 164         |

|             |             |             |             |             |             |             |
|-------------|-------------|-------------|-------------|-------------|-------------|-------------|
| 52_Rv0632c_ | 53_Rv0798c_ | 54_Rv0801_A | 55_Rv0934_A | 56_Rv0944_A | 57_Rv0984_A | 58_Rv1030_A |
| 544.5       | 1205.5      | 684.5       | 5390        | 2416.5      | 899         | 496         |
| 23926       | 2158        | 1140.5      | 768         | 3120.5      | 1375        | 1807        |
| 1392        | 3169.5      | 1833        | 28789       | 4342.5      | 1897        | 1258        |
| 1044        | 2517.5      | 1145.5      | 1176        | 2043        | 2812        | 7748        |
| 4665.92     | 1910.25     | 1028.75     | 7817.17     | 2792.58     | 1463.5      | 2050.17     |
| 358.25      | 255         | 221.5       | 114.5       | 572.5       | 269.5       | 164         |

|             |             |             |             |             |             |             |
|-------------|-------------|-------------|-------------|-------------|-------------|-------------|
| 52_Rv0632c_ | 53_Rv0798c_ | 54_Rv0801_A | 55_Rv0934_A | 56_Rv0944_A | 57_Rv0984_A | 58_Rv1030_A |
| 511         | 1289.5      | 837.5       | 489         | 2270        | 1466        | 3770        |
| 23926       | 2158        | 1140.5      | 768         | 3120.5      | 1375        | 1807        |
| 1247        | 1292        | 2163        | 16365       | 3811.5      | 1616        | 2063.5      |
| 10651.14    | 1662.07     | 1156.71     | 2876.57     | 2854.71     | 1448.43     | 2684.93     |
| 358.25      | 255         | 221.5       | 114.5       | 572.5       | 269.5       | 164         |

|             |             |             |             |             |             |             |
|-------------|-------------|-------------|-------------|-------------|-------------|-------------|
| 52_Rv0632c_ | 53_Rv0798c_ | 54_Rv0801_A | 55_Rv0934_A | 56_Rv0944_A | 57_Rv0984_A | 58_Rv1030_A |
| 2536        | 1747.5      | 929         | 865         | 3119        | 1332        | 1289.5      |
| 23926       | 2158        | 1140.5      | 768         | 3120.5      | 1375        | 1807        |
| 1247        | 1292        | 2163        | 16365       | 3811.5      | 1616        | 2063.5      |
| 15065       | 4483        | 409.5       | 22600.5     | 1084        | 432         | 269.5       |
| 6614.75     | 2083.81     | 1044.75     | 5507.31     | 2951.38     | 1260.38     | 1323.44     |
| 358.25      | 255         | 221.5       | 114.5       | 572.5       | 269.5       | 164         |

|             |             |             |             |             |             |             |
|-------------|-------------|-------------|-------------|-------------|-------------|-------------|
| 52_Rv0632c_ | 53_Rv0798c_ | 54_Rv0801_A | 55_Rv0934_A | 56_Rv0944_A | 57_Rv0984_A | 58_Rv1030_A |
| 30219       | 2433        | 2271        | 1478        | 12805       | 5424        | 2738.5      |
| 1247        | 1292        | 2163        | 16365       | 3811.5      | 1616        | 2063.5      |
| 2351        | 1295.5      | 508         | 291         | 1492        | 736         | 1207        |
| 17710.56    | 1927.06     | 1671.33     | 2736.44     | 8034.72     | 3438.22     | 2153        |
| 358.25      | 255         | 221.5       | 114.5       | 572.5       | 269.5       | 164         |

|             |             |             |             |             |             |             |
|-------------|-------------|-------------|-------------|-------------|-------------|-------------|
| 52_Rv0632c_ | 53_Rv0798c_ | 54_Rv0801_A | 55_Rv0934_A | 56_Rv0944_A | 57_Rv0984_A | 58_Rv1030_A |
| 1008        | 809         | 703.5       | 986         | 1775        | 1782        | 1044        |
| 23926       | 2158        | 1140.5      | 768         | 3120.5      | 1375        | 1807        |
| 1392        | 3169.5      | 1833        | 28789       | 4342.5      | 1897        | 1258        |
| 1044        | 2517.5      | 1145.5      | 1176        | 2043        | 2812        | 7748        |
| 3356.2      | 2034.2      | 1081.15     | 3839.5      | 2300.3      | 2267.8      | 4493.7      |
| 358.25      | 255         | 221.5       | 114.5       | 572.5       | 269.5       | 164         |
| 1           | 1           | 1           | 1           | 1           | 1           | 1           |

|             |             |             |             |             |             |             |
|-------------|-------------|-------------|-------------|-------------|-------------|-------------|
| 59_Rv1175c_ | 60_Rv1196_A | 61_Rv1242_A | 62_Rv1242_A | 63_Rv1284_A | 64_Rv1411c_ | 65_Rv1566c_ |
| 7582        | 1709        | 2010        | 1884        | 1831        | 103         | 2306.5      |
| 7582        | 1709        | 2010        | 1884        | 1831        | 103         | 2306.5      |
| 846         | 153         | 210         | 306.75      | 337         | 24.75       | 218.25      |

|             |             |             |             |             |             |             |
|-------------|-------------|-------------|-------------|-------------|-------------|-------------|
| 59_Rv1175c_ | 60_Rv1196_A | 61_Rv1242_A | 62_Rv1242_A | 63_Rv1284_A | 64_Rv1411c_ | 65_Rv1566c_ |
| 6247        | 913         | 882         | 1106.5      | 979         | 105.5       | 1797.5      |
| 6445        | 8793        | 2472.5      | 2605        | 4487.5      | 126.5       | 2646        |
| 6346        | 4853        | 1677.25     | 1855.75     | 2733.25     | 116         | 2221.75     |
| 846         | 153         | 210         | 306.75      | 337         | 24.75       | 218.25      |

|             |             |             |             |             |             |             |
|-------------|-------------|-------------|-------------|-------------|-------------|-------------|
| 59_Rv1175c_ | 60_Rv1196_A | 61_Rv1242_A | 62_Rv1242_A | 63_Rv1284_A | 64_Rv1411c_ | 65_Rv1566c_ |
| 5870        | 11648       | 2073        | 1956        | 6608.5      | 7465        | 2850.5      |
| 21344       | 1718        | 2364.5      | 2905.5      | 878         | 41          | 1353.5      |
| 7582        | 1709        | 2010        | 1884        | 1831        | 103         | 2306.5      |
| 11598.67    | 5025        | 2149.17     | 2248.5      | 3105.83     | 2536.33     | 2170.17     |
| 846         | 153         | 210         | 306.75      | 337         | 24.75       | 218.25      |
| 1           | 1           | 1           | 1           | 1           | 1           | 1           |

|             |             |             |             |             |             |             |
|-------------|-------------|-------------|-------------|-------------|-------------|-------------|
| 59_Rv1175c_ | 60_Rv1196_A | 61_Rv1242_A | 62_Rv1242_A | 63_Rv1284_A | 64_Rv1411c_ | 65_Rv1566c_ |
| 3404        | 611         | 607         | 658         | 442         | 69          | 426         |
| 1368        | 468.5       | 640         | 643.5       | 4824        | 377         | 593         |
| 6445        | 8793        | 2472.5      | 2605        | 4487.5      | 126.5       | 2646        |
| 21344       | 1718        | 2364.5      | 2905.5      | 878         | 41          | 1353.5      |
| 8900.5      | 4943.13     | 1987.38     | 2189.75     | 3669.25     | 167.75      | 1809.63     |
| 846         | 153         | 210         | 306.75      | 337         | 24.75       | 218.25      |

|             |             |             |             |             |             |             |
|-------------|-------------|-------------|-------------|-------------|-------------|-------------|
| 59_Rv1175c_ | 60_Rv1196_A | 61_Rv1242_A | 62_Rv1242_A | 63_Rv1284_A | 64_Rv1411c_ | 65_Rv1566c_ |
| 6445        | 8793        | 2472.5      | 2605        | 4487.5      | 126.5       | 2646        |
| 21344       | 1718        | 2364.5      | 2905.5      | 878         | 41          | 1353.5      |
| 7582        | 1709        | 2010        | 1884        | 1831        | 103         | 2306.5      |
| 9652.2      | 5961.2      | 2358.4      | 2520.9      | 3234.3      | 104.7       | 2319.6      |
| 846         | 153         | 210         | 306.75      | 337         | 24.75       | 218.25      |

|             |             |             |             |             |             |             |
|-------------|-------------|-------------|-------------|-------------|-------------|-------------|
| 59_Rv1175c_ | 60_Rv1196_A | 61_Rv1242_A | 62_Rv1242_A | 63_Rv1284_A | 64_Rv1411c_ | 65_Rv1566c_ |
| 3212        | 492         | 689         | 805         | 1389.5      | 51          | 8694        |
| 5870        | 11648       | 2073        | 1956        | 6608.5      | 7465        | 2850.5      |
| 4668        | 6929        | 1686        | 1741        | 2383        | 132         | 1748        |
| 21344       | 1718        | 2364.5      | 2905.5      | 878         | 41          | 1353.5      |
| 6919.67     | 3628.5      | 1365.08     | 1502.92     | 2339.67     | 1298.5      | 5339        |
| 846         | 153         | 210         | 306.75      | 337         | 24.75       | 218.25      |

|             |             |             |             |             |             |             |
|-------------|-------------|-------------|-------------|-------------|-------------|-------------|
| 59_Rv1175c_ | 60_Rv1196_A | 61_Rv1242_A | 62_Rv1242_A | 63_Rv1284_A | 64_Rv1411c_ | 65_Rv1566c_ |
| 10029       | 775         | 872         | 1101        | 639         | 55          | 507         |
| 5870        | 11648       | 2073        | 1956        | 6608.5      | 7465        | 2850.5      |
| 7582        | 1709        | 2010        | 1884        | 1831        | 103         | 2306.5      |
| 7897        | 5568.29     | 1549.29     | 1579.29     | 3367.64     | 3237.57     | 1768.43     |
| 846         | 153         | 210         | 306.75      | 337         | 24.75       | 218.25      |

|             |             |             |             |             |             |             |
|-------------|-------------|-------------|-------------|-------------|-------------|-------------|
| 59_Rv1175c_ | 60_Rv1196_A | 61_Rv1242_A | 62_Rv1242_A | 63_Rv1284_A | 64_Rv1411c_ | 65_Rv1566c_ |
| 5880.5      | 3639.5      | 1249.5      | 1391        | 1407.5      | 78          | 2377.5      |
| 5870        | 11648       | 2073        | 1956        | 6608.5      | 7465        | 2850.5      |
| 7582        | 1709        | 2010        | 1884        | 1831        | 103         | 2306.5      |
| 841         | 299         | 865         | 896         | 339         | 37.5        | 184         |
| 5461.94     | 3981.69     | 1399.44     | 1461.38     | 1977        | 999.44      | 2153.56     |
| 846         | 153         | 210         | 306.75      | 337         | 24.75       | 218.25      |

|             |             |             |             |             |             |             |
|-------------|-------------|-------------|-------------|-------------|-------------|-------------|
| 59_Rv1175c_ | 60_Rv1196_A | 61_Rv1242_A | 62_Rv1242_A | 63_Rv1284_A | 64_Rv1411c_ | 65_Rv1566c_ |
| 6445        | 8793        | 2472.5      | 2605        | 4487.5      | 126.5       | 2646        |
| 7582        | 1709        | 2010        | 1884        | 1831        | 103         | 2306.5      |
| 4706        | 404         | 481         | 492.5       | 18671       | 54          | 390         |
| 5991.67     | 5209.56     | 1757.28     | 1820.72     | 8920.17     | 99.72       | 1856.28     |
| 846         | 153         | 210         | 306.75      | 337         | 24.75       | 218.25      |

|             |             |             |             |             |             |             |
|-------------|-------------|-------------|-------------|-------------|-------------|-------------|
| 59_Rv1175c_ | 60_Rv1196_A | 61_Rv1242_A | 62_Rv1242_A | 63_Rv1284_A | 64_Rv1411c_ | 65_Rv1566c_ |
| 3922        | 557         | 610         | 691.5       | 2196        | 113         | 1758        |
| 5870        | 11648       | 2073        | 1956        | 6608.5      | 7465        | 2850.5      |
| 4668        | 6929        | 1686        | 1741        | 2383        | 132         | 1748        |
| 21344       | 1718        | 2364.5      | 2905.5      | 878         | 41          | 1353.5      |
| 12902.4     | 2883.8      | 1741.15     | 2029.9      | 1996.95     | 814.1       | 1664        |
| 846         | 153         | 210         | 306.75      | 337         | 24.75       | 218.25      |
| 1           | 1           | 1           | 1           | 1           | 1           | 1           |

|             |             |             |             |             |             |             |
|-------------|-------------|-------------|-------------|-------------|-------------|-------------|
| 66_Rv1629_A | 67_Rv1837c_ | 68_Rv1860_A | 69_Rv1886c_ | 70_Rv1926c_ | 71_Rv1980c_ | 72_Rv1984_A |
| 2628.5      | 2908        | 4033        | 3876        | 1948        | 33745       | 2313        |
| 2628.5      | 2908        | 4033        | 3876        | 1948        | 33745       | 2313        |
| 233         | 248.25      | 70          | 130.5       | 37.5        | 130.5       | 195         |

|             |             |             |             |             |             |             |
|-------------|-------------|-------------|-------------|-------------|-------------|-------------|
| 66_Rv1629_A | 67_Rv1837c_ | 68_Rv1860_A | 69_Rv1886c_ | 70_Rv1926c_ | 71_Rv1980c_ | 72_Rv1984_A |
| 1701.5      | 4068.5      | 1182        | 618.5       | 307         | 782         | 1109        |
| 4184        | 2239        | 10540.5     | 3998        | 1743.5      | 33307       | 3056        |
| 2942.75     | 3153.75     | 5861.25     | 2308.25     | 1025.25     | 17044.5     | 2082.5      |
| 233         | 248.25      | 70          | 130.5       | 37.5        | 130.5       | 195         |

|             |             |             |             |             |             |             |
|-------------|-------------|-------------|-------------|-------------|-------------|-------------|
| 66_Rv1629_A | 67_Rv1837c_ | 68_Rv1860_A | 69_Rv1886c_ | 70_Rv1926c_ | 71_Rv1980c_ | 72_Rv1984_A |
| 634         | 1240        | 648         | 840         | 888         | 235         | 1272        |
| 1260        | 1815.5      | 1278        | 954         | 347         | 102         | 2435        |
| 2628.5      | 2908        | 4033        | 3876        | 1948        | 33745       | 2313        |
| 1507.5      | 1987.83     | 1986.33     | 1890        | 1061        | 11360.67    | 2006.67     |
| 233         | 248.25      | 70          | 130.5       | 37.5        | 130.5       | 195         |
| 1           | 1           | 1           | 1           | 1           | 1           | 1           |

|             |             |             |             |             |             |             |
|-------------|-------------|-------------|-------------|-------------|-------------|-------------|
| 66_Rv1629_A | 67_Rv1837c_ | 68_Rv1860_A | 69_Rv1886c_ | 70_Rv1926c_ | 71_Rv1980c_ | 72_Rv1984_A |
| 866         | 1037        | 7661        | 650.5       | 511         | 698         | 673         |
| 390.5       | 467.5       | 10551       | 335         | 141         | 211         | 569         |
| 4184        | 2239        | 10540.5     | 3998        | 1743.5      | 33307       | 3056        |
| 1260        | 1815.5      | 1278        | 954         | 347         | 102         | 2435        |
| 2504.63     | 1690.25     | 8227.5      | 2321.25     | 993.75      | 16731.75    | 2279        |
| 233         | 248.25      | 70          | 130.5       | 37.5        | 130.5       | 195         |

|             |             |             |             |             |             |             |
|-------------|-------------|-------------|-------------|-------------|-------------|-------------|
| 66_Rv1629_A | 67_Rv1837c_ | 68_Rv1860_A | 69_Rv1886c_ | 70_Rv1926c_ | 71_Rv1980c_ | 72_Rv1984_A |
| 4184        | 2239        | 10540.5     | 3998        | 1743.5      | 33307       | 3056        |
| 1260        | 1815.5      | 1278        | 954         | 347         | 102         | 2435        |
| 2628.5      | 2908        | 4033        | 3876        | 1948        | 33745       | 2313        |
| 3288.1      | 2288.1      | 7386.5      | 3364.8      | 1505.1      | 26753.6     | 2783.2      |
| 233         | 248.25      | 70          | 130.5       | 37.5        | 130.5       | 195         |

|             |             |             |             |             |             |             |
|-------------|-------------|-------------|-------------|-------------|-------------|-------------|
| 66_Rv1629_A | 67_Rv1837c_ | 68_Rv1860_A | 69_Rv1886c_ | 70_Rv1926c_ | 71_Rv1980c_ | 72_Rv1984_A |
| 1267        | 16795.5     | 6704        | 1679.5      | 3173.5      | 1199        | 1442        |
| 634         | 1240        | 648         | 840         | 888         | 235         | 1272        |
| 935         | 1127        | 546.5       | 1024.5      | 609         | 1104        | 1463        |
| 1260        | 1815.5      | 1278        | 954         | 347         | 102         | 2435        |
| 1105        | 9094.83     | 3764.08     | 1309.5      | 1894.08     | 839.67      | 1582.67     |
| 233         | 248.25      | 70          | 130.5       | 37.5        | 130.5       | 195         |

|             |             |             |             |             |             |             |
|-------------|-------------|-------------|-------------|-------------|-------------|-------------|
| 66_Rv1629_A | 67_Rv1837c_ | 68_Rv1860_A | 69_Rv1886c_ | 70_Rv1926c_ | 71_Rv1980c_ | 72_Rv1984_A |
| 869         | 1076        | 3878        | 568         | 143         | 482         | 912         |
| 634         | 1240        | 648         | 840         | 888         | 235         | 1272        |
| 2628.5      | 2908        | 4033        | 3876        | 1948        | 33745       | 2313        |
| 1019.64     | 1408        | 2515.86     | 1157.14     | 720.14      | 5128        | 1266.43     |
| 233         | 248.25      | 70          | 130.5       | 37.5        | 130.5       | 195         |

|             |             |             |             |             |             |             |
|-------------|-------------|-------------|-------------|-------------|-------------|-------------|
| 66_Rv1629_A | 67_Rv1837c_ | 68_Rv1860_A | 69_Rv1886c_ | 70_Rv1926c_ | 71_Rv1980c_ | 72_Rv1984_A |
| 2660        | 1080        | 2333        | 793.5       | 644         | 170.5       | 1087.5      |
| 634         | 1240        | 648         | 840         | 888         | 235         | 1272        |
| 2628.5      | 2908        | 4033        | 3876        | 1948        | 33745       | 2313        |
| 222         | 288         | 157         | 209         | 84          | 280         | 329.5       |
| 2098.06     | 1229.5      | 2062.88     | 1111.56     | 767.5       | 4389.06     | 1169        |
| 233         | 248.25      | 70          | 130.5       | 37.5        | 130.5       | 195         |

|             |             |             |             |             |             |             |
|-------------|-------------|-------------|-------------|-------------|-------------|-------------|
| 66_Rv1629_A | 67_Rv1837c_ | 68_Rv1860_A | 69_Rv1886c_ | 70_Rv1926c_ | 71_Rv1980c_ | 72_Rv1984_A |
| 4184        | 2239        | 10540.5     | 3998        | 1743.5      | 33307       | 3056        |
| 2628.5      | 2908        | 4033        | 3876        | 1948        | 33745       | 2313        |
| 905         | 447         | 389         | 292         | 132         | 2597        | 513         |
| 2918.17     | 1716        | 6433.61     | 2749.11     | 1229.06     | 23119       | 2125.78     |
| 233         | 248.25      | 70          | 130.5       | 37.5        | 130.5       | 195         |

|             |             |             |             |             |             |             |
|-------------|-------------|-------------|-------------|-------------|-------------|-------------|
| 66_Rv1629_A | 67_Rv1837c_ | 68_Rv1860_A | 69_Rv1886c_ | 70_Rv1926c_ | 71_Rv1980c_ | 72_Rv1984_A |
| 1048        | 1148.5      | 755         | 543         | 254.5       | 5348.5      | 765.5       |
| 634         | 1240        | 648         | 840         | 888         | 235         | 1272        |
| 935         | 1127        | 546.5       | 1024.5      | 609         | 1104        | 1463        |
| 1260        | 1815.5      | 1278        | 954         | 347         | 102         | 2435        |
| 1101.3      | 1489        | 984.95      | 826.35      | 399.55      | 1789.45     | 1720.65     |
| 233         | 248.25      | 70          | 130.5       | 37.5        | 130.5       | 195         |
| 1           | 1           | 1           | 1           | 1           | 1           | 1           |

73\_Rv1984c\_ / 74\_Rv2031c\_ / 75\_Rv2094c\_ / 76\_Rv2151\_A 77\_Rv2252 lo 78\_Rv2282c\_ / 79\_Rv2282\_A  
6823 892 1033.5 572 1976 1673.5 3143.5  
6823 892 1033.5 572 1976 1673.5 3143.5  
308.5 40.5 286.25 36.25 295.5 143 337.75

73\_Rv1984c\_ / 74\_Rv2031c\_ / 75\_Rv2094c\_ / 76\_Rv2151\_A 77\_Rv2252 lo 78\_Rv2282c\_ / 79\_Rv2282\_A  
1209.5 106 1774.5 6005 2427 1396 1292.5  
6366.5 364 778 911 2172 1946.5 3868  
3788 235 1276.25 3458 2299.5 1671.25 2580.25  
308.5 40.5 286.25 36.25 295.5 143 337.75

73\_Rv1984c\_ / 74\_Rv2031c\_ / 75\_Rv2094c\_ / 76\_Rv2151\_A 77\_Rv2252 lo 78\_Rv2282c\_ / 79\_Rv2282\_A  
844 1084 496 560 1540.5 987.5 2848  
4430 42 9585 150 3105.5 1762 2510  
6823 892 1033.5 572 1976 1673.5 3143.5  
4032.33 672.67 3704.83 427.33 2207.33 1474.33 2833.83  
308.5 40.5 286.25 36.25 295.5 143 337.75  
1 1 1 1 1 1 1

73\_Rv1984c\_ / 74\_Rv2031c\_ / 75\_Rv2094c\_ / 76\_Rv2151\_A 77\_Rv2252 lo 78\_Rv2282c\_ / 79\_Rv2282\_A  
875 73 1160 155 690 376 857.5  
505 1268 531 466 743 928 633  
6366.5 364 778 911 2172 1946.5 3868  
4430 42 9585 150 3105.5 1762 2510  
4417 509.5 2918 609.5 2048.13 1645.75 2719.75  
308.5 40.5 286.25 36.25 295.5 143 337.75

73\_Rv1984c\_ / 74\_Rv2031c\_ / 75\_Rv2094c\_ / 76\_Rv2151\_A 77\_Rv2252 lo 78\_Rv2282c\_ / 79\_Rv2282\_A  
6366.5 364 778 911 2172 1946.5 3868  
4430 42 9585 150 3105.5 1762 2510  
6823 892 1033.5 572 1976 1673.5 3143.5  
6070.5 405.2 2590.5 691 2319.5 1855 3451.5  
308.5 40.5 286.25 36.25 295.5 143 337.75

73\_Rv1984c\_ / 74\_Rv2031c\_ / 75\_Rv2094c\_ / 76\_Rv2151\_A 77\_Rv2252 lo 78\_Rv2282c\_ / 79\_Rv2282\_A  
1457 2359.5 846 204 1012 781 1139  
844 1084 496 560 1540.5 987.5 2848  
967 236 661 577 1852 958 2038  
4430 42 9585 150 3105.5 1762 2510  
1768.67 1406.75 2213.33 316.5 1589 1008.42 1802.17  
308.5 40.5 286.25 36.25 295.5 143 337.75

73\_Rv1984c\_ /74\_Rv2031c\_ /75\_Rv2094c\_ /76\_Rv2151\_A 77\_Rv2252 lo 78\_Rv2282c\_ /79\_Rv2282\_A  
1058 300 12938 607.5 1574 897.5 2179.5  
844 1084 496 560 1540.5 987.5 2848  
6823 892 1033.5 572 1976 1673.5 3143.5  
1789.86 720.57 5905.07 582.07 1617.07 1046.93 2603.71  
308.5 40.5 286.25 36.25 295.5 143 337.75

73\_Rv1984c\_ /74\_Rv2031c\_ /75\_Rv2094c\_ /76\_Rv2151\_A 77\_Rv2252 lo 78\_Rv2282c\_ /79\_Rv2282\_A  
1284 159 1504 343.5 1426 1275 1905  
844 1084 496 560 1540.5 987.5 2848  
6823 892 1033.5 572 1976 1673.5 3143.5  
311 2226 360 235 441 441 450.5  
1799.75 624.62 1176.19 385.56 1385.94 1184.62 1995.88  
308.5 40.5 286.25 36.25 295.5 143 337.75

73\_Rv1984c\_ /74\_Rv2031c\_ /75\_Rv2094c\_ /76\_Rv2151\_A 77\_Rv2252 lo 78\_Rv2282c\_ /79\_Rv2282\_A  
6366.5 364 778 911 2172 1946.5 3868  
6823 892 1033.5 572 1976 1673.5 3143.5  
516.5 187.5 1884 123 650.5 305.5 729  
4467.22 363.83 1175.06 610.67 1643.06 1369.17 2741.17  
308.5 40.5 286.25 36.25 295.5 143 337.75

73\_Rv1984c\_ /74\_Rv2031c\_ /75\_Rv2094c\_ /76\_Rv2151\_A 77\_Rv2252 lo 78\_Rv2282c\_ /79\_Rv2282\_A  
805.5 112 467 191 886.5 425 1813  
844 1084 496 560 1540.5 987.5 2848  
967 236 661 577 1852 958 2038  
4430 42 9585 150 3105.5 1762 2510  
2637.75 186.6 5048.3 246 2157.95 1203.05 2287.5  
308.5 40.5 286.25 36.25 295.5 143 337.75  
1 1 1 1 1 1 1



|             |             |             |             |             |             |             |
|-------------|-------------|-------------|-------------|-------------|-------------|-------------|
| 80_Rv2544_A | 81_Rv2618_A | 82_Rv2870_A | 83_Rv2870_A | 84_Rv2873_A | 85_Rv2875_A | 86_Rv2927_A |
| 873         | 570.5       | 1648        | 1183.5      | 629         | 1444        | 13771       |
| 873         | 570.5       | 1648        | 1183.5      | 629         | 1444        | 13771       |
| 175.75      | 40.25       | 280.5       | 214.5       | 42          | 165         | 787         |

|             |             |             |             |             |             |             |
|-------------|-------------|-------------|-------------|-------------|-------------|-------------|
| 80_Rv2544_A | 81_Rv2618_A | 82_Rv2870_A | 83_Rv2870_A | 84_Rv2873_A | 85_Rv2875_A | 86_Rv2927_A |
| 1096        | 310.5       | 1233        | 1764.5      | 548         | 1201        | 8868.5      |
| 1178.5      | 391         | 2661.5      | 1661.5      | 4992        | 4288        | 10404       |
| 1137.25     | 350.75      | 1947.25     | 1713        | 2770        | 2744.5      | 9636.25     |
| 175.75      | 40.25       | 280.5       | 214.5       | 42          | 165         | 787         |

|             |             |             |             |             |             |             |
|-------------|-------------|-------------|-------------|-------------|-------------|-------------|
| 80_Rv2544_A | 81_Rv2618_A | 82_Rv2870_A | 83_Rv2870_A | 84_Rv2873_A | 85_Rv2875_A | 86_Rv2927_A |
| 775         | 297.5       | 1456.5      | 1201.5      | 524         | 8595        | 7145        |
| 2235.5      | 1151        | 3120        | 2621.5      | 451         | 14944.5     | 5548        |
| 873         | 570.5       | 1648        | 1183.5      | 629         | 1444        | 13771       |
| 1294.5      | 673         | 2074.83     | 1668.83     | 534.67      | 8327.83     | 8821.33     |
| 175.75      | 40.25       | 280.5       | 214.5       | 42          | 165         | 787         |
| 1           | 1           | 1           | 1           | 1           | 1           | 1           |

|             |             |             |             |             |             |             |
|-------------|-------------|-------------|-------------|-------------|-------------|-------------|
| 80_Rv2544_A | 81_Rv2618_A | 82_Rv2870_A | 83_Rv2870_A | 84_Rv2873_A | 85_Rv2875_A | 86_Rv2927_A |
| 483.5       | 135         | 761         | 557.5       | 2377        | 578         | 3300        |
| 321         | 463         | 815         | 601         | 9771.5      | 5647.5      | 4917        |
| 1178.5      | 391         | 2661.5      | 1661.5      | 4992        | 4288        | 10404       |
| 2235.5      | 1151        | 3120        | 2621.5      | 451         | 14944.5     | 5548        |
| 1228.38     | 599         | 2314.5      | 1636.38     | 5051.63     | 7292        | 7818.25     |
| 175.75      | 40.25       | 280.5       | 214.5       | 42          | 165         | 787         |

|             |             |             |             |             |             |             |
|-------------|-------------|-------------|-------------|-------------|-------------|-------------|
| 80_Rv2544_A | 81_Rv2618_A | 82_Rv2870_A | 83_Rv2870_A | 84_Rv2873_A | 85_Rv2875_A | 86_Rv2927_A |
| 1178.5      | 391         | 2661.5      | 1661.5      | 4992        | 4288        | 10404       |
| 2235.5      | 1151        | 3120        | 2621.5      | 451         | 14944.5     | 5548        |
| 873         | 570.5       | 1648        | 1183.5      | 629         | 1444        | 13771       |
| 1328.8      | 578.9       | 2550.5      | 1757.9      | 3211.2      | 5850.5      | 10106.2     |
| 175.75      | 40.25       | 280.5       | 214.5       | 42          | 165         | 787         |

|             |             |             |             |             |             |             |
|-------------|-------------|-------------|-------------|-------------|-------------|-------------|
| 80_Rv2544_A | 81_Rv2618_A | 82_Rv2870_A | 83_Rv2870_A | 84_Rv2873_A | 85_Rv2875_A | 86_Rv2927_A |
| 529.5       | 109         | 1186        | 796         | 13140       | 591         | 2886        |
| 775         | 297.5       | 1456.5      | 1201.5      | 524         | 8595        | 7145        |
| 837         | 615.5       | 1893        | 1341        | 11572       | 3773        | 8194        |
| 2235.5      | 1151        | 3120        | 2621.5      | 451         | 14944.5     | 5548        |
| 906         | 398.5       | 1671.25     | 1258.67     | 8661.17     | 4847.58     | 4924.17     |
| 175.75      | 40.25       | 280.5       | 214.5       | 42          | 165         | 787         |

| 80_Rv2544_A | 81_Rv2618_A | 82_Rv2870_A | 83_Rv2870_A | 84_Rv2873_A | 85_Rv2875_A | 86_Rv2927_A |
|-------------|-------------|-------------|-------------|-------------|-------------|-------------|
| 1003.5      | 858         | 1010        | 941         | 348         | 2635.5      | 4583        |
| 775         | 297.5       | 1456.5      | 1201.5      | 524         | 8595        | 7145        |
| 873         | 570.5       | 1648        | 1183.5      | 629         | 1444        | 13771       |
| 886.93      | 576.71      | 1292.5      | 1087.29     | 463.57      | 5019.36     | 6993.57     |
| 175.75      | 40.25       | 280.5       | 214.5       | 42          | 165         | 787         |

| 80_Rv2544_A | 81_Rv2618_A | 82_Rv2870_A | 83_Rv2870_A | 84_Rv2873_A | 85_Rv2875_A | 86_Rv2927_A |
|-------------|-------------|-------------|-------------|-------------|-------------|-------------|
| 1244        | 1948.5      | 1611        | 1598.5      | 31763       | 19639       | 4683.5      |
| 775         | 297.5       | 1456.5      | 1201.5      | 524         | 8595        | 7145        |
| 873         | 570.5       | 1648        | 1183.5      | 629         | 1444        | 13771       |
| 208         | 66          | 402.5       | 245         | 200         | 167         | 894.5       |
| 1009.5      | 1334.56     | 1445.25     | 1327.81     | 20021       | 13550.12    | 5653.5      |
| 175.75      | 40.25       | 280.5       | 214.5       | 42          | 165         | 787         |

| 80_Rv2544_A | 81_Rv2618_A | 82_Rv2870_A | 83_Rv2870_A | 84_Rv2873_A | 85_Rv2875_A | 86_Rv2927_A |
|-------------|-------------|-------------|-------------|-------------|-------------|-------------|
| 1178.5      | 391         | 2661.5      | 1661.5      | 4992        | 4288        | 10404       |
| 873         | 570.5       | 1648        | 1183.5      | 629         | 1444        | 13771       |
| 415         | 88          | 527         | 548.5       | 86          | 646         | 2612.5      |
| 890.06      | 309.94      | 1837.39     | 1237.39     | 2871.89     | 2758        | 8180.94     |
| 175.75      | 40.25       | 280.5       | 214.5       | 42          | 165         | 787         |

| 80_Rv2544_A | 81_Rv2618_A | 82_Rv2870_A | 83_Rv2870_A | 84_Rv2873_A | 85_Rv2875_A | 86_Rv2927_A |
|-------------|-------------|-------------|-------------|-------------|-------------|-------------|
| 1139.5      | 155         | 799.5       | 1599        | 260         | 622         | 3754.5      |
| 775         | 297.5       | 1456.5      | 1201.5      | 524         | 8595        | 7145        |
| 837         | 615.5       | 1893        | 1341        | 11572       | 3773        | 8194        |
| 2235.5      | 1151        | 3120        | 2621.5      | 451         | 14944.5     | 5548        |
| 1620.8      | 713.3       | 2134.8      | 2044.7      | 1513.1      | 8895.65     | 5434.25     |
| 175.75      | 40.25       | 280.5       | 214.5       | 42          | 165         | 787         |
| 1           | 1           | 1           | 1           | 1           | 1           | 1           |

|             |             |             |             |             |             |             |
|-------------|-------------|-------------|-------------|-------------|-------------|-------------|
| 87_Rv2984_A | 88_Rv2984_A | 89_Rv3050_A | 90_Rv3243_A | 91_Rv3243_A | 92_Rv3248_A | 93_Rv3319_A |
| 2800        | 1550        | 5265.5      | 2837        | 1807        | 3467        | 2061        |
| 2800        | 1550        | 5265.5      | 2837        | 1807        | 3467        | 2061        |
| 353.75      | 113         | 322.5       | 514.75      | 257         | 521.75      | 275.75      |

|             |             |             |             |             |             |             |
|-------------|-------------|-------------|-------------|-------------|-------------|-------------|
| 87_Rv2984_A | 88_Rv2984_A | 89_Rv3050_A | 90_Rv3243_A | 91_Rv3243_A | 92_Rv3248_A | 93_Rv3319_A |
| 1323        | 721.5       | 1115        | 2097        | 1156        | 1647        | 1231.5      |
| 3733.5      | 1684.5      | 5509        | 3820        | 2614        | 3254        | 2392        |
| 2528.25     | 1203        | 3312        | 2958.5      | 1885        | 2450.5      | 1811.75     |
| 353.75      | 113         | 322.5       | 514.75      | 257         | 521.75      | 275.75      |

|             |             |             |             |             |             |             |
|-------------|-------------|-------------|-------------|-------------|-------------|-------------|
| 87_Rv2984_A | 88_Rv2984_A | 89_Rv3050_A | 90_Rv3243_A | 91_Rv3243_A | 92_Rv3248_A | 93_Rv3319_A |
| 2895.5      | 1603        | 8391        | 2764        | 1621.5      | 4370        | 1968        |
| 2675        | 1185        | 2102        | 2726        | 2695        | 2844        | 2344        |
| 2800        | 1550        | 5265.5      | 2837        | 1807        | 3467        | 2061        |
| 2790.17     | 1446        | 5252.83     | 2775.67     | 2041.17     | 3560.33     | 2124.33     |
| 353.75      | 113         | 322.5       | 514.75      | 257         | 521.75      | 275.75      |
| 1           | 1           | 1           | 1           | 1           | 1           | 1           |

|             |             |             |             |             |             |             |
|-------------|-------------|-------------|-------------|-------------|-------------|-------------|
| 87_Rv2984_A | 88_Rv2984_A | 89_Rv3050_A | 90_Rv3243_A | 91_Rv3243_A | 92_Rv3248_A | 93_Rv3319_A |
| 891         | 355         | 764.5       | 1312.5      | 670         | 4139        | 687         |
| 820         | 368         | 1179        | 1077        | 600         | 1349.5      | 934         |
| 3733.5      | 1684.5      | 5509        | 3820        | 2614        | 3254        | 2392        |
| 2675        | 1185        | 2102        | 2726        | 2695        | 2844        | 2344        |
| 2740.5      | 1230.5      | 3574.75     | 2860.75     | 2130.75     | 2675.37     | 2015.5      |
| 353.75      | 113         | 322.5       | 514.75      | 257         | 521.75      | 275.75      |

|             |             |             |             |             |             |             |
|-------------|-------------|-------------|-------------|-------------|-------------|-------------|
| 87_Rv2984_A | 88_Rv2984_A | 89_Rv3050_A | 90_Rv3243_A | 91_Rv3243_A | 92_Rv3248_A | 93_Rv3319_A |
| 3733.5      | 1684.5      | 5509        | 3820        | 2614        | 3254        | 2392        |
| 2675        | 1185        | 2102        | 2726        | 2695        | 2844        | 2344        |
| 2800        | 1550        | 5265.5      | 2837        | 1807        | 3467        | 2061        |
| 3335.1      | 1557.7      | 4778.9      | 3404.6      | 2468.8      | 3214.6      | 2316.2      |
| 353.75      | 113         | 322.5       | 514.75      | 257         | 521.75      | 275.75      |

|             |             |             |             |             |             |             |
|-------------|-------------|-------------|-------------|-------------|-------------|-------------|
| 87_Rv2984_A | 88_Rv2984_A | 89_Rv3050_A | 90_Rv3243_A | 91_Rv3243_A | 92_Rv3248_A | 93_Rv3319_A |
| 1403        | 428         | 1285        | 1626        | 987         | 1750.5      | 988.5       |
| 2895.5      | 1603        | 8391        | 2764        | 1621.5      | 4370        | 1968        |
| 2440        | 1153        | 4326.5      | 2939        | 1864        | 6013        | 2647        |
| 2675        | 1185        | 2102        | 2726        | 2695        | 2844        | 2344        |
| 2036.58     | 870.83      | 3112.42     | 2217.83     | 1523.58     | 3079.75     | 1654.08     |
| 353.75      | 113         | 322.5       | 514.75      | 257         | 521.75      | 275.75      |

|             |             |             |             |             |             |             |
|-------------|-------------|-------------|-------------|-------------|-------------|-------------|
| 87_Rv2984_A | 88_Rv2984_A | 89_Rv3050_A | 90_Rv3243_A | 91_Rv3243_A | 92_Rv3248_A | 93_Rv3319_A |
| 1095        | 442.5       | 1015.5      | 1483        | 901.5       | 1583        | 979.5       |
| 2895.5      | 1603        | 8391        | 2764        | 1621.5      | 4370        | 1968        |
| 2800        | 1550        | 5265.5      | 2837        | 1807        | 3467        | 2061        |
| 2110.21     | 1098.07     | 4783.57     | 2225.43     | 1339.43     | 3046.57     | 1557.64     |
| 353.75      | 113         | 322.5       | 514.75      | 257         | 521.75      | 275.75      |

|             |             |             |             |             |             |             |
|-------------|-------------|-------------|-------------|-------------|-------------|-------------|
| 87_Rv2984_A | 88_Rv2984_A | 89_Rv3050_A | 90_Rv3243_A | 91_Rv3243_A | 92_Rv3248_A | 93_Rv3319_A |
| 2258        | 1370.5      | 6016        | 2557        | 1514        | 3733        | 2487        |
| 2895.5      | 1603        | 8391        | 2764        | 1621.5      | 4370        | 1968        |
| 2800        | 1550        | 5265.5      | 2837        | 1807        | 3467        | 2061        |
| 483         | 224         | 2086.5      | 592         | 360         | 644         | 413         |
| 2183.56     | 1278.69     | 5727.88     | 2372.25     | 1419.81     | 3393.25     | 2109.62     |
| 353.75      | 113         | 322.5       | 514.75      | 257         | 521.75      | 275.75      |

|             |             |             |             |             |             |             |
|-------------|-------------|-------------|-------------|-------------|-------------|-------------|
| 87_Rv2984_A | 88_Rv2984_A | 89_Rv3050_A | 90_Rv3243_A | 91_Rv3243_A | 92_Rv3248_A | 93_Rv3319_A |
| 3733.5      | 1684.5      | 5509        | 3820        | 2614        | 3254        | 2392        |
| 2800        | 1550        | 5265.5      | 2837        | 1807        | 3467        | 2061        |
| 601         | 177         | 699.5       | 1025        | 500         | 849         | 573         |
| 2585.61     | 1167.06     | 3878.78     | 2779.11     | 1819.67     | 2476        | 1748.89     |
| 353.75      | 113         | 322.5       | 514.75      | 257         | 521.75      | 275.75      |

|             |             |             |             |             |             |             |
|-------------|-------------|-------------|-------------|-------------|-------------|-------------|
| 87_Rv2984_A | 88_Rv2984_A | 89_Rv3050_A | 90_Rv3243_A | 91_Rv3243_A | 92_Rv3248_A | 93_Rv3319_A |
| 1134.5      | 382         | 3070        | 1529.5      | 825.5       | 3397        | 988.5       |
| 2895.5      | 1603        | 8391        | 2764        | 1621.5      | 4370        | 1968        |
| 2440        | 1153        | 4326.5      | 2939        | 1864        | 6013        | 2647        |
| 2675        | 1185        | 2102        | 2726        | 2695        | 2844        | 2344        |
| 2211.4      | 982.7       | 3243.75     | 2392.15     | 1943.7      | 3479.4      | 1930.05     |
| 353.75      | 113         | 322.5       | 514.75      | 257         | 521.75      | 275.75      |
| 1           | 1           | 1           | 1           | 1           | 1           | 1           |

|             |             |             |             |             |             |             |
|-------------|-------------|-------------|-------------|-------------|-------------|-------------|
| 94_Rv3319_A | 95_Rv3326_A | 96_Rv3326_A | 97_Rv3362_A | 98_Rv3362c_ | 99_Rv3376_A | 100_Rv3376_ |
| 1084.5      | 3610        | 3818        | 2148.5      | 1478        | 1848        | 1763        |
| 1084.5      | 3610        | 3818        | 2148.5      | 1478        | 1848        | 1763        |
| 133         | 392.25      | 447.5       | 287.5       | 343         | 202         | 290.75      |

|             |             |             |             |             |             |             |
|-------------|-------------|-------------|-------------|-------------|-------------|-------------|
| 94_Rv3319_A | 95_Rv3326_A | 96_Rv3326_A | 97_Rv3362_A | 98_Rv3362c_ | 99_Rv3376_A | 100_Rv3376_ |
| 1017        | 1610        | 1435        | 1058        | 9582        | 1090.5      | 1016        |
| 1591        | 4145        | 4213        | 3082        | 2017        | 2362.5      | 2666        |
| 1304        | 2877.5      | 2824        | 2070        | 5799.5      | 1726.5      | 1841        |
| 133         | 392.25      | 447.5       | 287.5       | 343         | 202         | 290.75      |

|             |             |             |             |             |             |             |
|-------------|-------------|-------------|-------------|-------------|-------------|-------------|
| 94_Rv3319_A | 95_Rv3326_A | 96_Rv3326_A | 97_Rv3362_A | 98_Rv3362c_ | 99_Rv3376_A | 100_Rv3376_ |
| 1249.5      | 5069        | 4317        | 2404.5      | 2015        | 1754        | 1773        |
| 1410        | 3162        | 2489.5      | 2202.5      | 4211.5      | 2612        | 2571.5      |
| 1084.5      | 3610        | 3818        | 2148.5      | 1478        | 1848        | 1763        |
| 1248        | 3947        | 3541.5      | 2251.83     | 2568.17     | 2071.33     | 2035.83     |
| 133         | 392.25      | 447.5       | 287.5       | 343         | 202         | 290.75      |
| 1           | 1           | 1           | 1           | 1           | 1           | 1           |

|             |             |             |             |             |             |             |
|-------------|-------------|-------------|-------------|-------------|-------------|-------------|
| 94_Rv3319_A | 95_Rv3326_A | 96_Rv3326_A | 97_Rv3362_A | 98_Rv3362c_ | 99_Rv3376_A | 100_Rv3376_ |
| 475         | 1110        | 1023        | 644         | 1906        | 585         | 703         |
| 321         | 906.5       | 782         | 590         | 762         | 455         | 597.5       |
| 1591        | 4145        | 4213        | 3082        | 2017        | 2362.5      | 2666        |
| 1410        | 3162        | 2489.5      | 2202.5      | 4211.5      | 2612        | 2571.5      |
| 1228.25     | 3089.63     | 2924.38     | 2239.13     | 2251.88     | 1948        | 2125.25     |
| 133         | 392.25      | 447.5       | 287.5       | 343         | 202         | 290.75      |

|             |             |             |             |             |             |             |
|-------------|-------------|-------------|-------------|-------------|-------------|-------------|
| 94_Rv3319_A | 95_Rv3326_A | 96_Rv3326_A | 97_Rv3362_A | 98_Rv3362c_ | 99_Rv3376_A | 100_Rv3376_ |
| 1591        | 4145        | 4213        | 3082        | 2017        | 2362.5      | 2666        |
| 1410        | 3162        | 2489.5      | 2202.5      | 4211.5      | 2612        | 2571.5      |
| 1084.5      | 3610        | 3818        | 2148.5      | 1478        | 1848        | 1763        |
| 1453.5      | 3841.4      | 3789.3      | 2719.4      | 2348.1      | 2309.5      | 2466.5      |
| 133         | 392.25      | 447.5       | 287.5       | 343         | 202         | 290.75      |

|             |             |             |             |             |             |             |
|-------------|-------------|-------------|-------------|-------------|-------------|-------------|
| 94_Rv3319_A | 95_Rv3326_A | 96_Rv3326_A | 97_Rv3362_A | 98_Rv3362c_ | 99_Rv3376_A | 100_Rv3376_ |
| 554         | 1582.5      | 1302.5      | 899         | 1676        | 599         | 1113        |
| 1249.5      | 5069        | 4317        | 2404.5      | 2015        | 1754        | 1773        |
| 1088.5      | 3796        | 3014        | 2104        | 2000        | 1682        | 2082        |
| 1410        | 3162        | 2489.5      | 2202.5      | 4211.5      | 2612        | 2571.5      |
| 901.67      | 2795.75     | 2288        | 1568        | 2209.08     | 1307.5      | 1627.58     |
| 133         | 392.25      | 447.5       | 287.5       | 343         | 202         | 290.75      |

|             |             |             |             |             |             |             |
|-------------|-------------|-------------|-------------|-------------|-------------|-------------|
| 94_Rv3319_A | 95_Rv3326_A | 96_Rv3326_A | 97_Rv3362_A | 98_Rv3362c_ | 99_Rv3376_A | 100_Rv3376_ |
| 461         | 1240        | 1200        | 913         | 1975        | 879         | 842         |
| 1249.5      | 5069        | 4317        | 2404.5      | 2015        | 1754        | 1773        |
| 1084.5      | 3610        | 3818        | 2148.5      | 1478        | 1848        | 1763        |
| 888         | 3219.57     | 2909.86     | 1728.71     | 1921.14     | 1392.43     | 1372.57     |
| 133         | 392.25      | 447.5       | 287.5       | 343         | 202         | 290.75      |

|             |             |             |             |             |             |             |
|-------------|-------------|-------------|-------------|-------------|-------------|-------------|
| 94_Rv3319_A | 95_Rv3326_A | 96_Rv3326_A | 97_Rv3362_A | 98_Rv3362c_ | 99_Rv3376_A | 100_Rv3376_ |
| 1612.5      | 3812        | 3793        | 1735        | 2397        | 1317        | 1489        |
| 1249.5      | 5069        | 4317        | 2404.5      | 2015        | 1754        | 1773        |
| 1084.5      | 3610        | 3818        | 2148.5      | 1478        | 1848        | 1763        |
| 274         | 556         | 506         | 314         | 499.5       | 283         | 364.5       |
| 1333.81     | 3536.88     | 3450.75     | 1692.75     | 1997.19     | 1308.75     | 1418.19     |
| 133         | 392.25      | 447.5       | 287.5       | 343         | 202         | 290.75      |

|             |             |             |             |             |             |             |
|-------------|-------------|-------------|-------------|-------------|-------------|-------------|
| 94_Rv3319_A | 95_Rv3326_A | 96_Rv3326_A | 97_Rv3362_A | 98_Rv3362c_ | 99_Rv3376_A | 100_Rv3376_ |
| 1591        | 4145        | 4213        | 3082        | 2017        | 2362.5      | 2666        |
| 1084.5      | 3610        | 3818        | 2148.5      | 1478        | 1848        | 1763        |
| 245         | 782         | 812         | 616         | 6827        | 348         | 537.5       |
| 1086.06     | 2964.56     | 3035.44     | 2156.28     | 3560.44     | 1633.83     | 1856.17     |
| 133         | 392.25      | 447.5       | 287.5       | 343         | 202         | 290.75      |

|             |             |             |             |             |             |             |
|-------------|-------------|-------------|-------------|-------------|-------------|-------------|
| 94_Rv3319_A | 95_Rv3326_A | 96_Rv3326_A | 97_Rv3362_A | 98_Rv3362c_ | 99_Rv3376_A | 100_Rv3376_ |
| 510         | 1123        | 1067        | 682         | 1300        | 563         | 661         |
| 1249.5      | 5069        | 4317        | 2404.5      | 2015        | 1754        | 1773        |
| 1088.5      | 3796        | 3014        | 2104        | 2000        | 1682        | 2082        |
| 1410        | 3162        | 2489.5      | 2202.5      | 4211.5      | 2612        | 2571.5      |
| 1091.8      | 2804.4      | 2297.95     | 1756.7      | 2897.25     | 1818.5      | 1869.55     |
| 133         | 392.25      | 447.5       | 287.5       | 343         | 202         | 290.75      |
| 1           | 1           | 1           | 1           | 1           | 1           | 1           |

|                                                                                 |       |      |        |        |      |      |
|---------------------------------------------------------------------------------|-------|------|--------|--------|------|------|
| 150_Rv3495c_151_Rv3616_152_Rv3628_153_Rv3762c_154_Rv3763_155_Rv3763_156_Rv3775_ |       |      |        |        |      |      |
| 840.5                                                                           | 925   | 1356 | 2445.5 | 1231.5 | 2567 | 2688 |
| 840.5                                                                           | 925   | 1356 | 2445.5 | 1231.5 | 2567 | 2688 |
| 159                                                                             | 85.25 | 280  | 350    | 239    | 133  | 280  |

|                                                                                 |       |         |         |        |        |        |
|---------------------------------------------------------------------------------|-------|---------|---------|--------|--------|--------|
| 150_Rv3495c_151_Rv3616_152_Rv3628_153_Rv3762c_154_Rv3763_155_Rv3763_156_Rv3775_ |       |         |         |        |        |        |
| 1489.5                                                                          | 592   | 752     | 2209.5  | 820    | 708    | 1288   |
| 1099                                                                            | 6256  | 18820.5 | 2305    | 1795   | 1803   | 2145   |
| 1294.25                                                                         | 3424  | 9786.25 | 2257.25 | 1307.5 | 1255.5 | 1716.5 |
| 159                                                                             | 85.25 | 280     | 350     | 239    | 133    | 280    |

|                                                                                 |         |         |         |        |        |         |
|---------------------------------------------------------------------------------|---------|---------|---------|--------|--------|---------|
| 150_Rv3495c_151_Rv3616_152_Rv3628_153_Rv3762c_154_Rv3763_155_Rv3763_156_Rv3775_ |         |         |         |        |        |         |
| 1801.5                                                                          | 23096   | 5139    | 2327    | 1576   | 5521.5 | 5240.5  |
| 11284                                                                           | 158     | 1364.5  | 1446    | 1670   | 820    | 2017    |
| 840.5                                                                           | 925     | 1356    | 2445.5  | 1231.5 | 2567   | 2688    |
| 4642                                                                            | 8059.67 | 2619.83 | 2072.83 | 1492.5 | 2969.5 | 3315.17 |
| 159                                                                             | 85.25   | 280     | 350     | 239    | 133    | 280     |
| 1                                                                               | 1       | 1       | 1       | 1      | 1      | 1       |

|                                                                                 |         |          |         |       |         |         |
|---------------------------------------------------------------------------------|---------|----------|---------|-------|---------|---------|
| 150_Rv3495c_151_Rv3616_152_Rv3628_153_Rv3762c_154_Rv3763_155_Rv3763_156_Rv3775_ |         |          |         |       |         |         |
| 397.5                                                                           | 435.5   | 8016     | 932     | 502.5 | 502.5   | 1048    |
| 339.5                                                                           | 409     | 8299     | 1147.5  | 532   | 897     | 1300    |
| 1099                                                                            | 6256    | 18820.5  | 2305    | 1795  | 1803    | 2145    |
| 11284                                                                           | 158     | 1364.5   | 1446    | 1670  | 820     | 2017    |
| 3455.38                                                                         | 3269.75 | 11826.13 | 1800.88 | 1448  | 1330.75 | 1901.75 |
| 159                                                                             | 85.25   | 280      | 350     | 239   | 133     | 280     |

|                                                                                 |        |         |        |        |        |      |
|---------------------------------------------------------------------------------|--------|---------|--------|--------|--------|------|
| 150_Rv3495c_151_Rv3616_152_Rv3628_153_Rv3762c_154_Rv3763_155_Rv3763_156_Rv3775_ |        |         |        |        |        |      |
| 1099                                                                            | 6256   | 18820.5 | 2305   | 1795   | 1803   | 2145 |
| 11284                                                                           | 158    | 1364.5  | 1446   | 1670   | 820    | 2017 |
| 840.5                                                                           | 925    | 1356    | 2445.5 | 1231.5 | 2567   | 2688 |
| 3084.3                                                                          | 3970.2 | 11836.4 | 2161.3 | 1657.3 | 1759.2 | 2228 |
| 159                                                                             | 85.25  | 280     | 350    | 239    | 133    | 280  |

|                                                                                 |          |         |         |         |         |        |
|---------------------------------------------------------------------------------|----------|---------|---------|---------|---------|--------|
| 150_Rv3495c_151_Rv3616_152_Rv3628_153_Rv3762c_154_Rv3763_155_Rv3763_156_Rv3775_ |          |         |         |         |         |        |
| 502.5                                                                           | 105      | 2843    | 2425    | 756.5   | 638     | 3843   |
| 1801.5                                                                          | 23096    | 5139    | 2327    | 1576    | 5521.5  | 5240.5 |
| 2125                                                                            | 37272    | 6961.5  | 3274.5  | 1785    | 2766    | 3905.5 |
| 11284                                                                           | 158      | 1364.5  | 1446    | 1670    | 820     | 2017   |
| 2786.33                                                                         | 10140.17 | 3665.67 | 2387.08 | 1216.75 | 1836.92 | 3782   |
| 159                                                                             | 85.25    | 280     | 350     | 239     | 133     | 280    |

|                                                                                 |          |         |         |         |         |         |
|---------------------------------------------------------------------------------|----------|---------|---------|---------|---------|---------|
| 150_Rv3495c_151_Rv3616_152_Rv3628_153_Rv3762c_154_Rv3763_155_Rv3763_156_Rv3775_ |          |         |         |         |         |         |
| 3436                                                                            | 112      | 2885    | 1337    | 782.5   | 441     | 1178    |
| 1801.5                                                                          | 23096    | 5139    | 2327    | 1576    | 5521.5  | 5240.5  |
| 840.5                                                                           | 925      | 1356    | 2445.5  | 1231.5  | 2567    | 2688    |
| 2364.71                                                                         | 10078.43 | 3632.57 | 1919.64 | 1186.71 | 2922.07 | 3134.79 |
| 159                                                                             | 85.25    | 280     | 350     | 239     | 133     | 280     |

|                                                                                 |         |         |         |        |         |         |
|---------------------------------------------------------------------------------|---------|---------|---------|--------|---------|---------|
| 150_Rv3495c_151_Rv3616_152_Rv3628_153_Rv3762c_154_Rv3763_155_Rv3763_156_Rv3775_ |         |         |         |        |         |         |
| 914                                                                             | 240.5   | 1762    | 2000    | 972.5  | 3074    | 3025    |
| 1801.5                                                                          | 23096   | 5139    | 2327    | 1576   | 5521.5  | 5240.5  |
| 840.5                                                                           | 925     | 1356    | 2445.5  | 1231.5 | 2567    | 2688    |
| 160.5                                                                           | 72      | 7942.5  | 602     | 289    | 430.5   | 582     |
| 921.56                                                                          | 3161.94 | 2905.94 | 1921.81 | 994.88 | 2986.12 | 2954.44 |
| 159                                                                             | 85.25   | 280     | 350     | 239    | 133     | 280     |

|                                                                                 |         |         |         |         |         |         |
|---------------------------------------------------------------------------------|---------|---------|---------|---------|---------|---------|
| 150_Rv3495c_151_Rv3616_152_Rv3628_153_Rv3762c_154_Rv3763_155_Rv3763_156_Rv3775_ |         |         |         |         |         |         |
| 1099                                                                            | 6256    | 18820.5 | 2305    | 1795    | 1803    | 2145    |
| 840.5                                                                           | 925     | 1356    | 2445.5  | 1231.5  | 2567    | 2688    |
| 426                                                                             | 565.5   | 522     | 829     | 386.5   | 692     | 654     |
| 845.94                                                                          | 3766.83 | 10780.5 | 1828.61 | 1262.89 | 1517.56 | 1708.33 |
| 159                                                                             | 85.25   | 280     | 350     | 239     | 133     | 280     |

|                                                                                 |        |        |         |        |         |         |
|---------------------------------------------------------------------------------|--------|--------|---------|--------|---------|---------|
| 150_Rv3495c_151_Rv3616_152_Rv3628_153_Rv3762c_154_Rv3763_155_Rv3763_156_Rv3775_ |        |        |         |        |         |         |
| 3522                                                                            | 252    | 501    | 1161    | 552    | 381     | 780.5   |
| 1801.5                                                                          | 23096  | 5139   | 2327    | 1576   | 5521.5  | 5240.5  |
| 2125                                                                            | 37272  | 6961.5 | 3274.5  | 1785   | 2766    | 3905.5  |
| 11284                                                                           | 158    | 1364.5 | 1446    | 1670   | 820     | 2017    |
| 7091.25                                                                         | 6191.4 | 2042.6 | 1631.45 | 1336.7 | 1353.05 | 2157.25 |
| 159                                                                             | 85.25  | 280    | 350     | 239    | 133     | 280     |
| 1                                                                               | 1      | 1      | 1       | 1      | 1       | 1       |



157\_Rv3804c\_158\_Rv3864\_159\_Rv3874\_160\_Rv3878\_161\_Rv3881c\_ADI 1  
36027 689 2123 231 37087  
36027 689 2123 231 37087  
81.5 83.75 58 10.75 81

157\_Rv3804c\_158\_Rv3864\_159\_Rv3874\_160\_Rv3878\_161\_Rv3881c\_ADI 1  
933 262 333 8419 1072  
39784 329 3645 166 294  
20358.5 295.5 1989 4292.5 683  
81.5 83.75 58 10.75 81

157\_Rv3804c\_158\_Rv3864\_159\_Rv3874\_160\_Rv3878\_161\_Rv3881c\_ADI 1  
4920 3950 7806 625 41006  
590 220 611 599 73  
36027 689 2123 231 37087  
13845.67 1619.67 3513.33 485 26055.33  
81.5 83.75 58 10.75 81  
1 1 1 1 1

157\_Rv3804c\_158\_Rv3864\_159\_Rv3874\_160\_Rv3878\_161\_Rv3881c\_ADI 1  
31394 262 13686 485 34898  
3434 661 394 135 22036  
39784 329 3645 166 294  
590 220 611 599 73  
20898 384.75 2073.75 266.5 5674.25  
81.5 83.75 58 10.75 81

157\_Rv3804c\_158\_Rv3864\_159\_Rv3874\_160\_Rv3878\_161\_Rv3881c\_ADI 1  
39784 329 3645 166 294  
590 220 611 599 73  
36027 689 2123 231 37087  
31193.8 379.2 2733.8 265.6 7608.4  
81.5 83.75 58 10.75 81

157\_Rv3804c\_158\_Rv3864\_159\_Rv3874\_160\_Rv3878\_161\_Rv3881c\_ADI 1  
21506 153 320 98.5 8024  
4920 3950 7806 625 41006  
33077 838 2233 319 48647.5  
590 220 611 599 73  
17184.17 911.17 1935 306.42 18966.42  
81.5 83.75 58 10.75 81

157\_Rv3804c\_158\_Rv3864\_159\_Rv3874\_160\_Rv3878\_161\_Rv3881c\_ADI 1  
380 170 190 338 1217  
4920 3950 7806 625 41006  
36027 689 2123 231 37087  
7418.14 1864.14 3730.14 445.71 23393.71  
81.5 83.75 58 10.75 81

157\_Rv3804c\_158\_Rv3864\_159\_Rv3874\_160\_Rv3878\_161\_Rv3881c\_ADI 1  
2958.5 1752 6744.5 198 17036  
4920 3950 7806 625 41006  
36027 689 2123 231 37087  
2822.5 110.5 659.5 42 27775  
7320.25 1688.69 5538.88 236 23881  
81.5 83.75 58 10.75 81

157\_Rv3804c\_158\_Rv3864\_159\_Rv3874\_160\_Rv3878\_161\_Rv3881c\_ADI 1  
39784 329 3645 166 294  
36027 689 2123 231 37087  
287 1098.5 1900.5 63 383.5  
26200.89 625.5 2894.39 138.89 4411.94  
81.5 83.75 58 10.75 81

157\_Rv3804c\_158\_Rv3864\_159\_Rv3874\_160\_Rv3878\_161\_Rv3881c\_ADI 1  
659.5 151 347 3032.5 962.5  
4920 3950 7806 625 41006  
33077 838 2233 319 48647.5  
590 220 611 599 73  
4292.55 634.1 1413.5 1303.65 9290.6  
81.5 83.75 58 10.75 81  
1 1 1 1 1
